# Supplementary material
Source: PubMed Central journal article supplement (PMC3551261)
Supplement: NIHMS428878-supplement-supplement_1.pdf [file NIHMS428878-supplement-supplement_1.pdf]

## e-Extra supplementary figures and tables

### Supplementary Figure 1: Experimental design for molecular and genetic analysis of the

**vegetable pathogen *P. capsici*.** (A) Two parental isolates of opposite mating types were crossed. Of 69 putative F<sub>1</sub> progeny, one was backcrossed (BC<sub>1</sub>) to parent LT263. A second backcross (BC<sub>2</sub>) yielded a moderately inbred isolate (LT1534) for genome sequencing. A hybrid Sanger/454 sequence assembly was performed and gene models were annotated both *ab initio* and using substantial EST and cDNA sequences generated for this project. The *P. capsici* genome and gene content was compared with other Phytophthora species. (B) LT1534, the parents, five other *P. capsici* isolates and a *P. tropicalis* isolate underwent reduced representation re-sequencing (RAD, Restriction site-Associated DNA sequencing) by SBS of 72nt tags flanking *SgrAI* sites. Single nucleotide variants (SNVs) were identified by alignment to the draft reference. SNV density and diversity were calculated. (C) *PstI* RAD was performed on 60 unique F<sub>1</sub> progeny from the original cross. 20,568 SNVs had simple Mendelian inheritance and were present in  $\geq 55$  of the progeny. The program JoinMap 4.1 was used to test the inheritance of markers from the largest ~100 scaffolds and to generate a genetic map. 18 linkage groups included 90% of the 19,805 predicted genes and covered 84% of the draft genome. Graphical genotypes revealed minimally spanning tracts of LOH in 23 progeny that ranged in length from 299bp to >1Mbp and spanned more than 30% of the genome. LOH was associated with a mating type switch in 4 isolates and with a change in pathogenicity in two isolates over the course of the study.

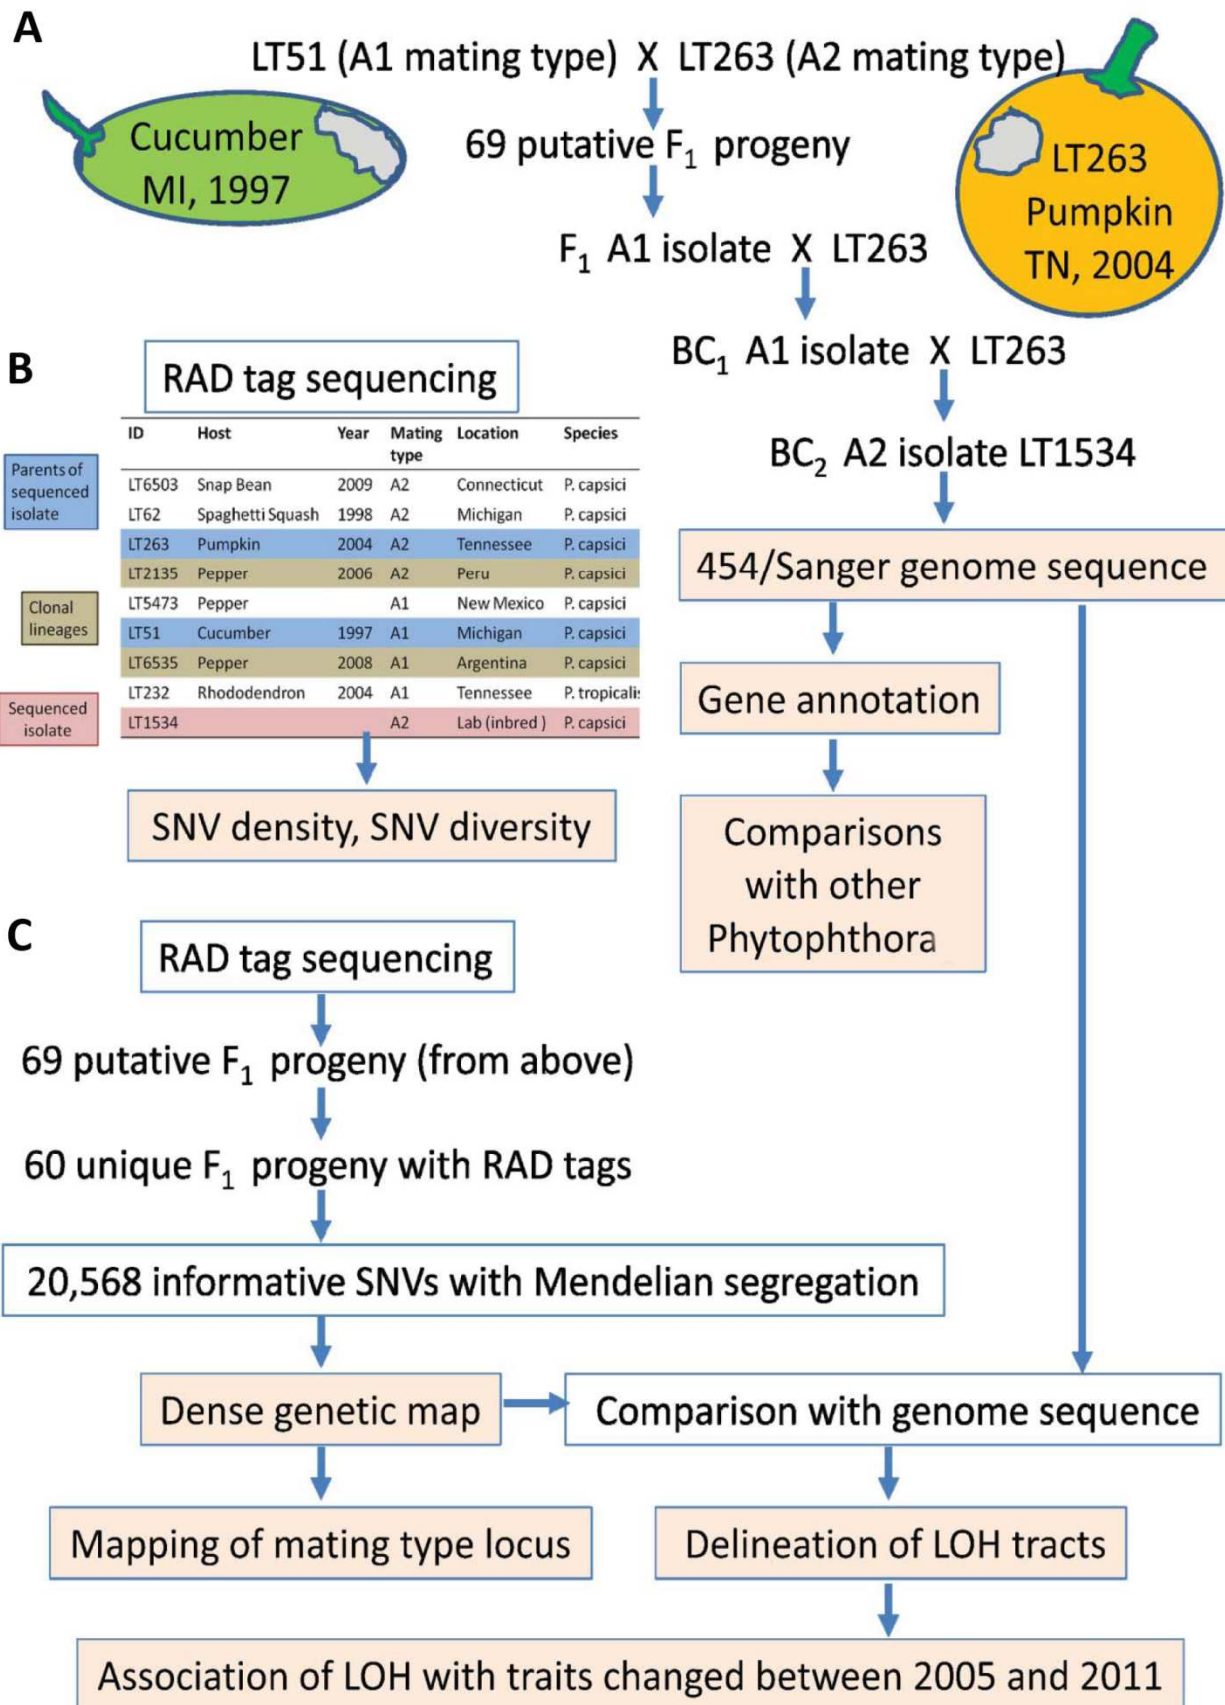

**Supplementary Figure 2. Graphical display of CEGMA analyses using standard parameters.** *P. capsici* has the highest number of identified core orthologous genes among all oomycete genomes of the *Peronosporaceae* and a comparable amount of fully covered genes. The increase in fully covered genes towards the most conserved ones is a result of the algorithm used for assessing gene completeness in the CEGMA analysis. The high percentage of fully covered genes for CEGMA groups 3 and 4 (most conserved), supports the high continuity of the assembly.

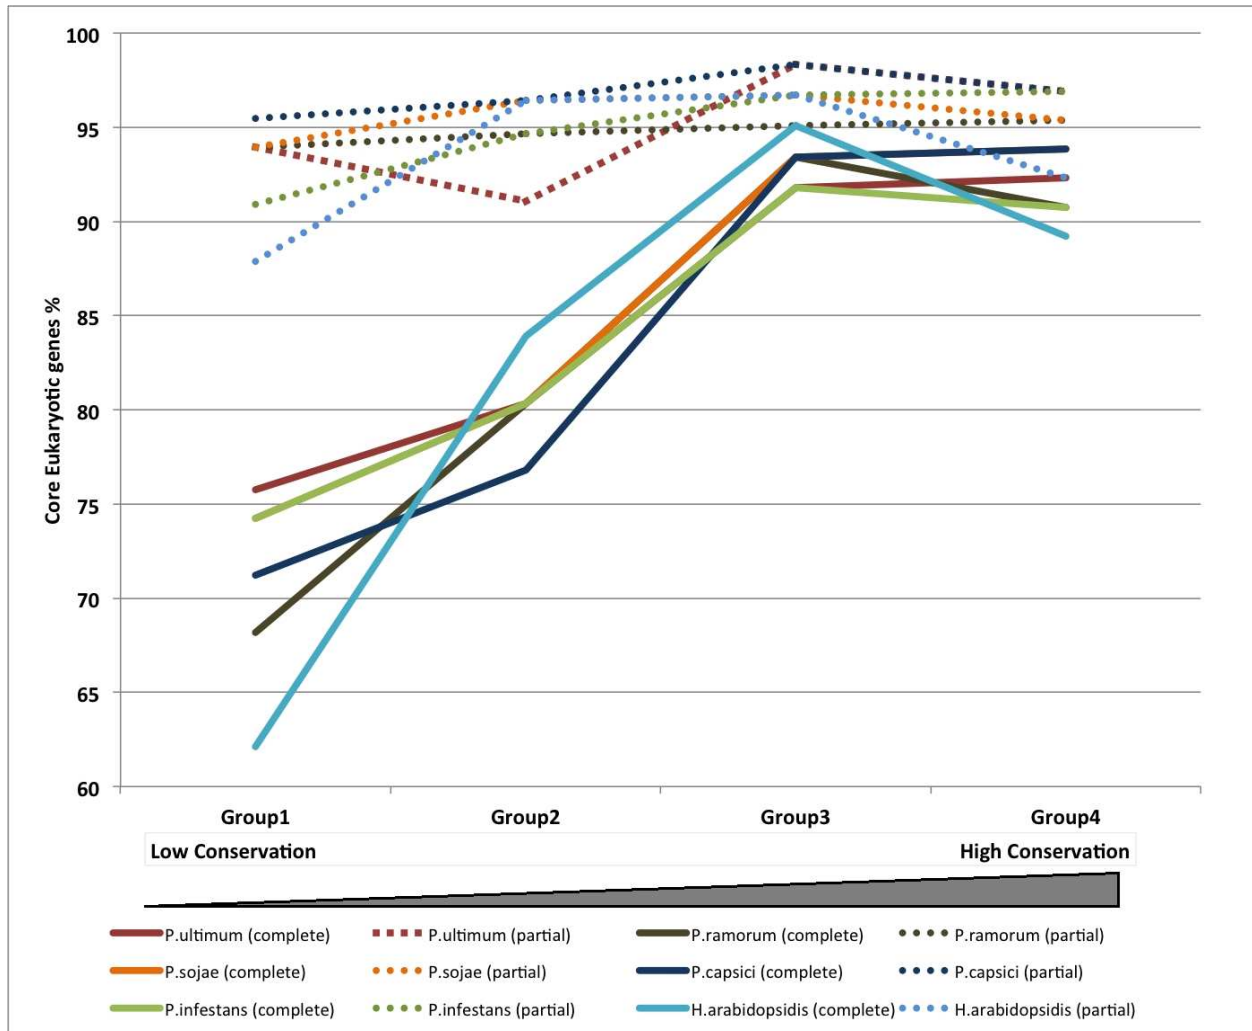

**Supplementary Figure 3: Pairwise comparisons of gene models from *P. capsici* with *P. infestans* showed good synteny with some duplications and translocations.** Sequences other than gene models were replaced with Ns. Nucleotide sequences were compared using PROmer package of MUMmer, which identifies Maximal Unique Matches in all 6 frames as anchors for amino-acid-based alignment. Large scaffolds (>450 kbp) are shown (155 Mbp for *P. infestans* and 46 Mbp for *P. capsici*). Scaffolds were ordered to maximize the center diagonal. There were some translocations, which possibly were assembly errors. A region (green box) of *P. infestans* had no syntenic genes in *P. capsici*.

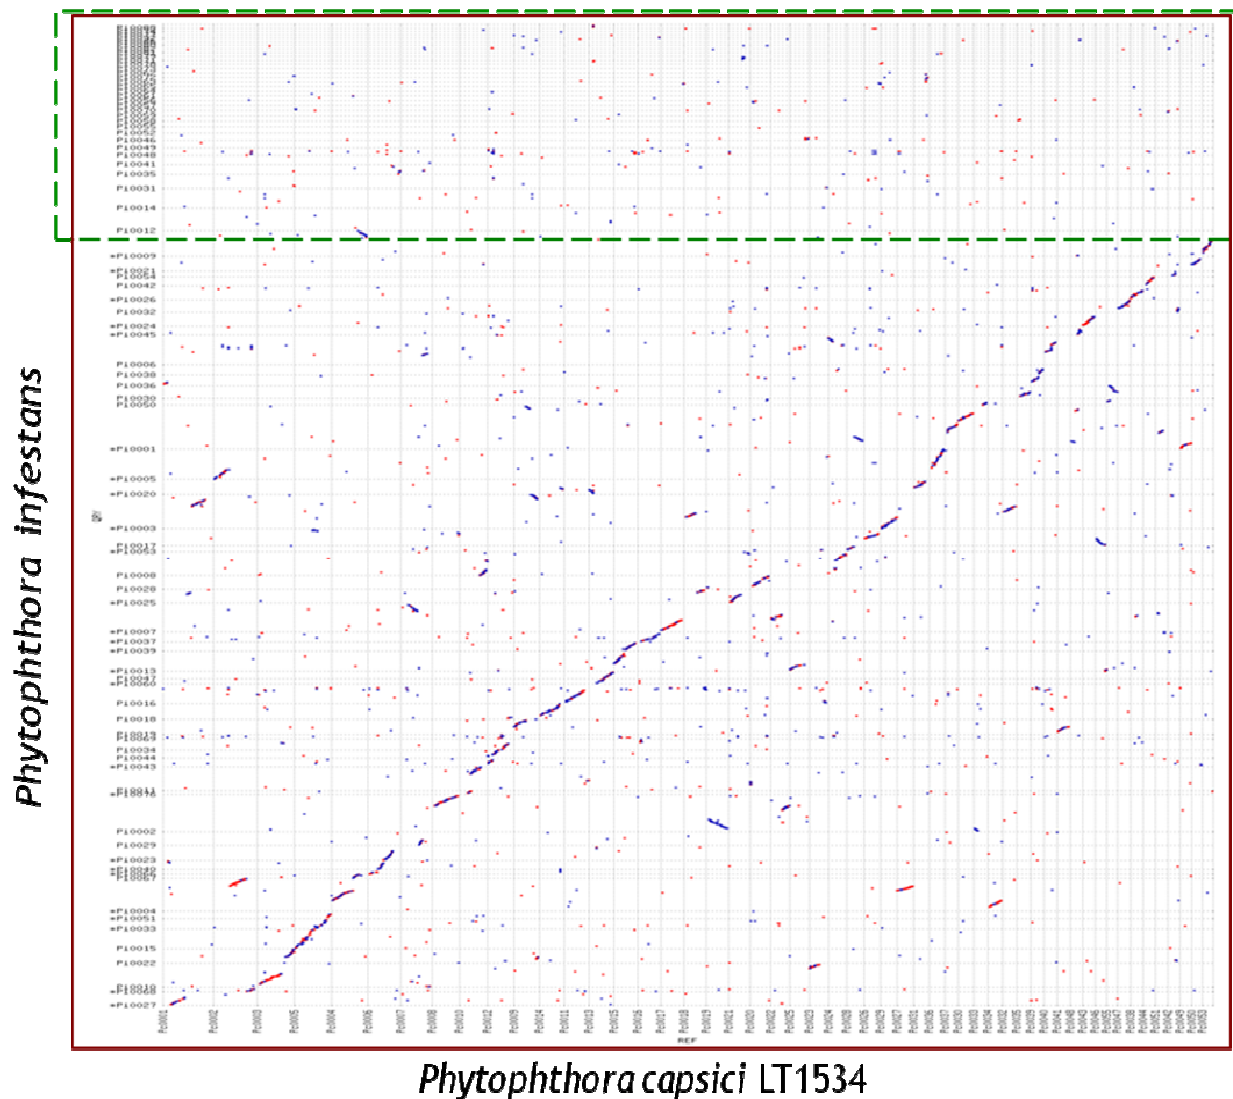

**Supplementary Figure 4: Dendrogram and cross correlations for SNVs from 7 *P. capsici* and a *P. tropicalis* (LT232) isolate at regions with 30X coverage in all samples.** Left side of the panel indicates isolate origin as abbreviated US state, Peru, or Argentina (Arg) followed by host designated as SB = snap bean, SS = summer squash, C = cucumber, P = pepper, and Rhodo = rhododendron. Branches on the similarity tree on the right side of the panel correspond to isolate directly across. Tree on bottom of panel is identical (isolate LT6503 on the far left) and correlations are designated by color legend on right.

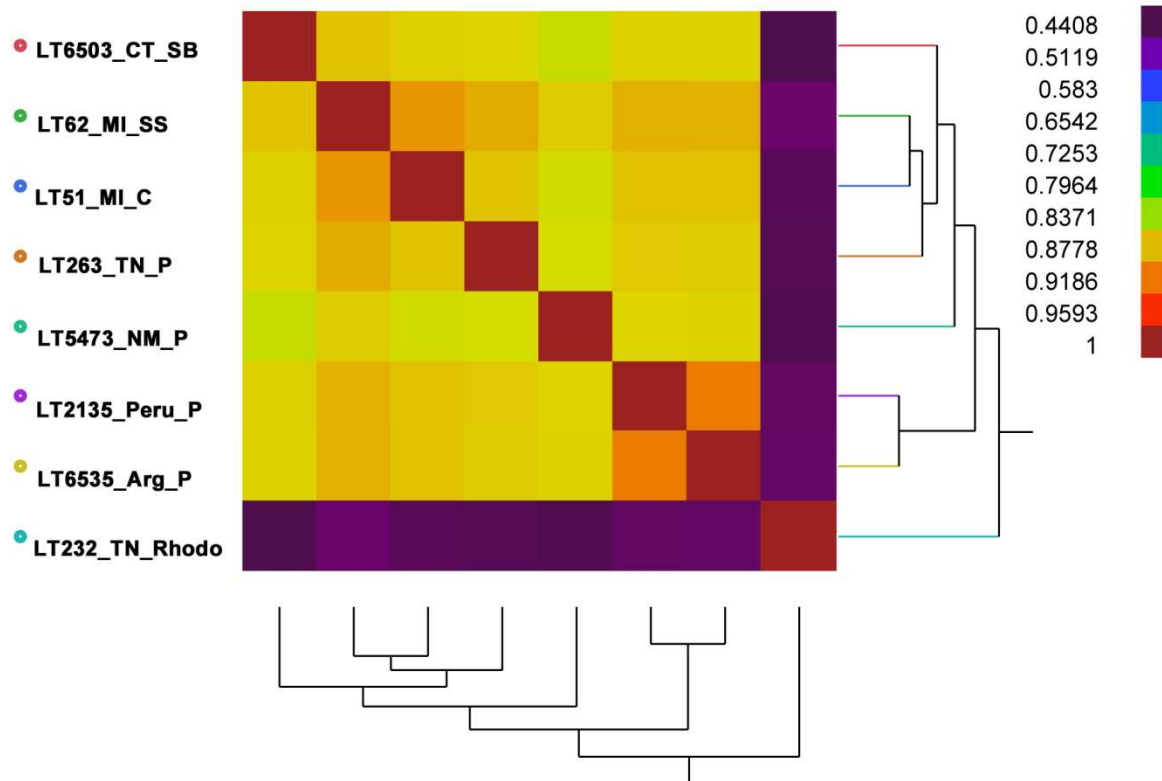

**Supplementary Figure 5: Overlap of SNV content of 7 *P. capsici* isolates and one *P. tropicalis* isolate (LT232) sequenced by RAD.** SNVs were called at sites with 30X coverage in all samples if supported by  $\geq 4$  uniquely aligning reads of Q score  $\geq 20$ . Of note, LT263 (recurrent parent of the LT1534) had the fewest SNVs of all *P. capsici* isolates; the two clonal lineages (host = pepper) showed the most overlap; *P. tropicalis* (LT232) showed the least overlap. A total of 64, 537 SNV positions are included. Positions with at least one alternate allele per isolate are LT6503 (20,445), LT62 (17,914), LT263 (14,637), LT2135 (20,869), LT5473 (21,386), LT51 (18,527), LT6535 (22,431), and LT232 (25,308).

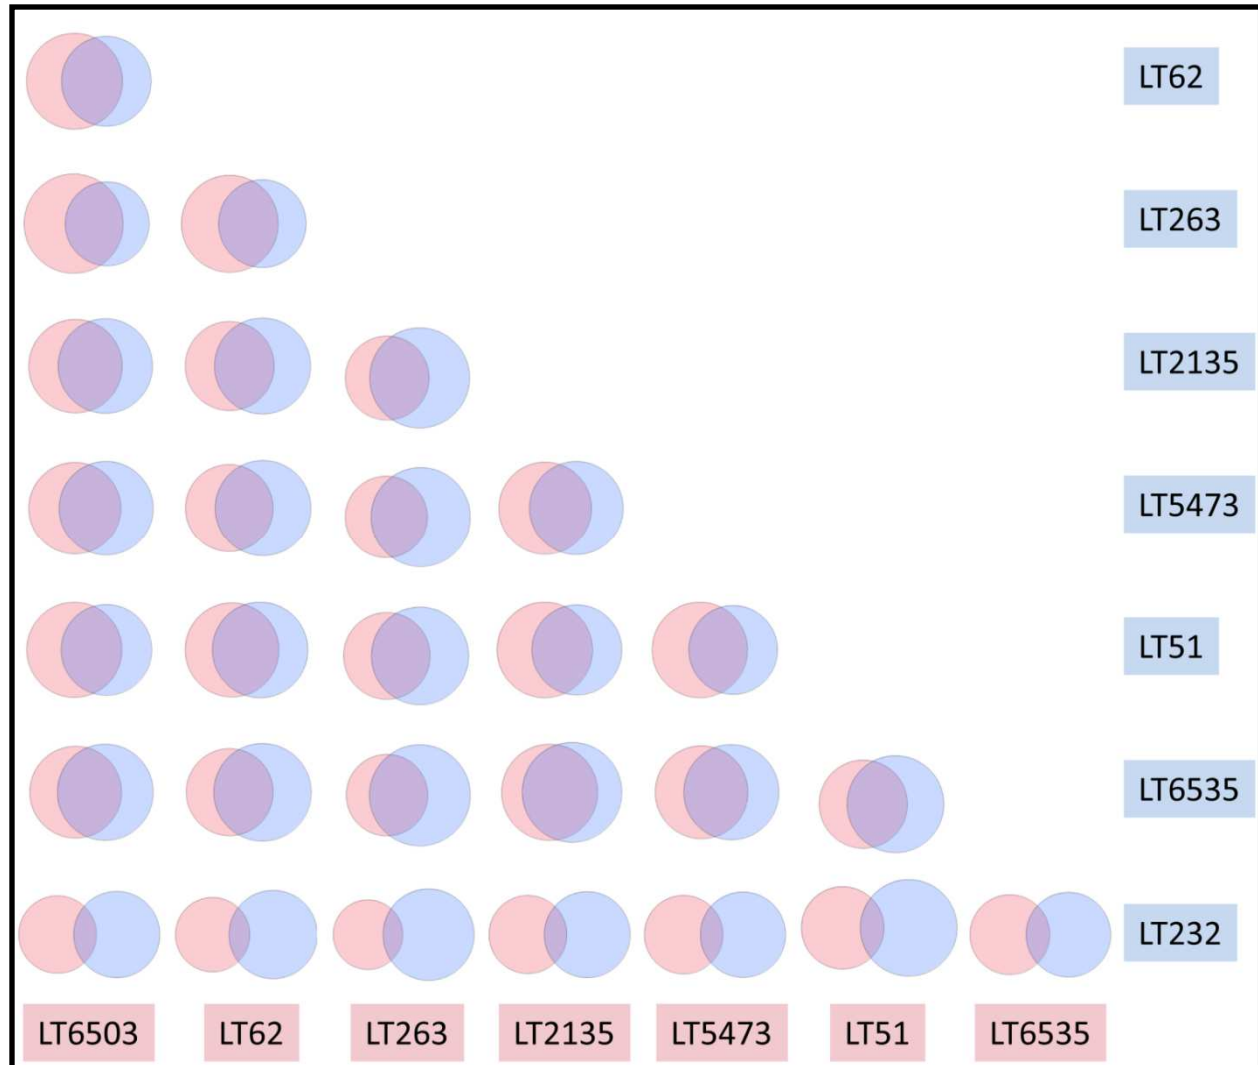

**Supplementary Figure 6: Relative abundance of RAD sequences from 69 progeny and two parents based on alignment to the reference *P. capsici* sequence.** The X-axis shows isolate ID's and Y-axis shows relative abundance.

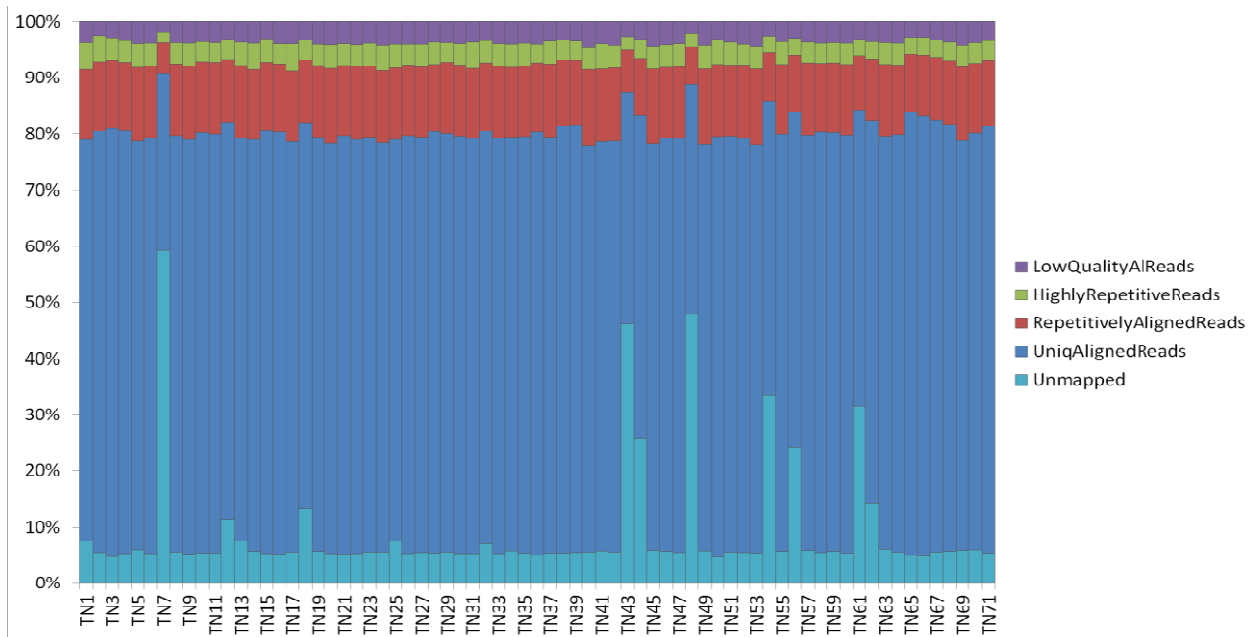

**Supplementary Figure 7. Frequencies of alleles based on the requirement for 10X and 20X unique coverage and an average quality of >20 for the alternate alleles.** For 10X unique coverage (top) this includes 5,849,663 SNVs and for 20X (bottom) this includes 4,449,193 SNVs across 71 samples.

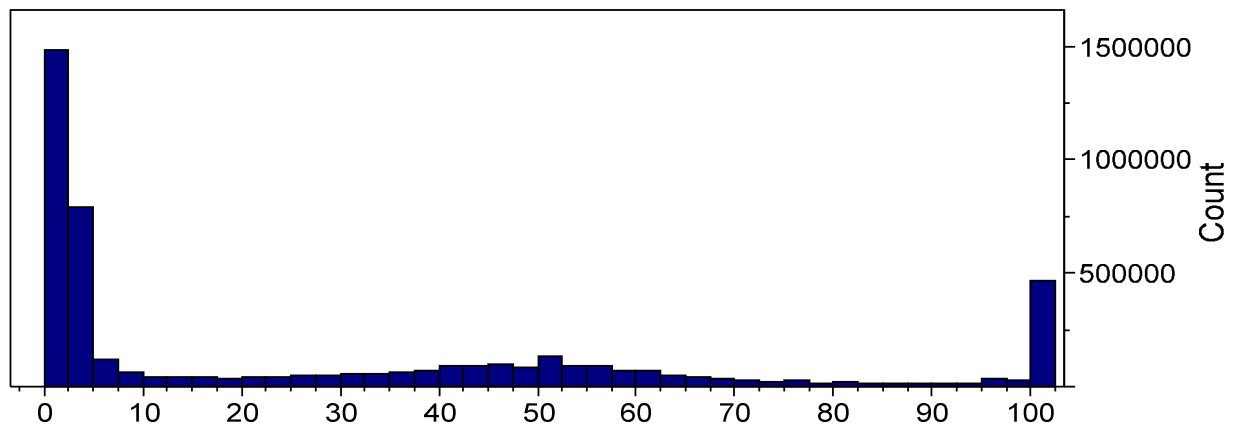

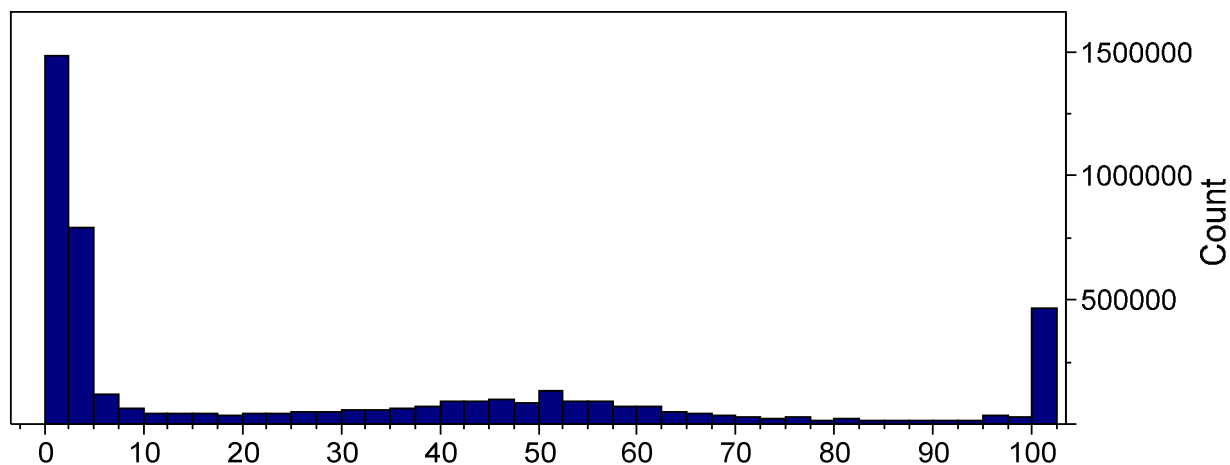

**Supplementary Figure 8: Gene-poor environments in *P. capsici* genome show reduced LOH frequency.** *P. capsici* genome architecture illustrated by the distribution of all predicted genes according to the length of their 5' (X-axis) and 3' (Y-axis) intergenic regions, counted by two-dimensional data binning. (A) Estimated SNP frequency is homogenous across the *P. capsici* genome. The SNV frequency was calculated across each individual scaffold (in SNPs per Kbp) and used as an estimate for local SNV frequency of each gene. The average of frequencies for genes in each bin is shown. (B) Genome architecture diagram showing only the 2072 genes affected by LOH in at least one re-sequenced strain from the progeny. (C) LOH frequency is reduced for genes residing in a gene-poor environment. The percentage of genes in bins affected by LOH in at least one re-sequenced strain from the progeny.

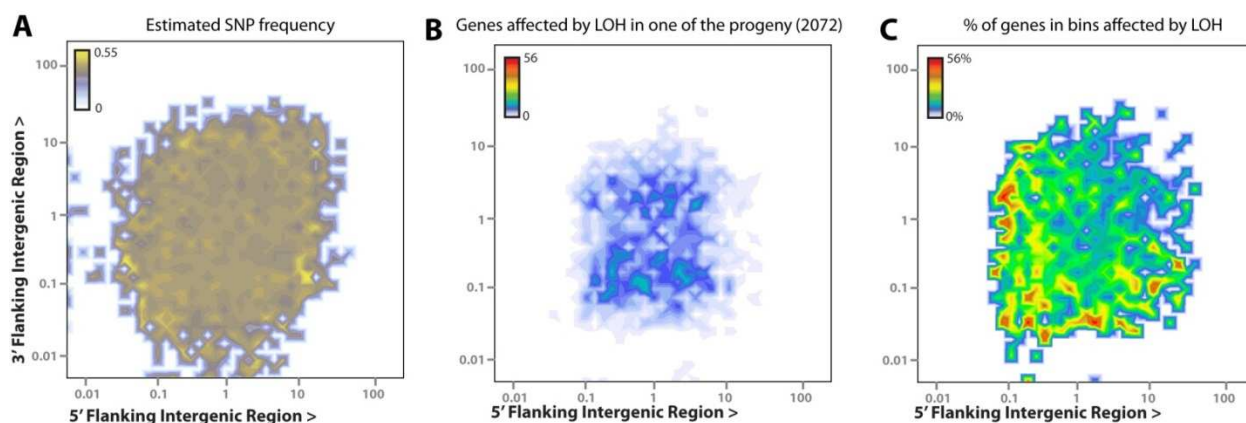



**Supplementary Figure 9: Comparison of the genetic map of *P. capsici* Linkage Group 1 (202cM) with the physical map of Scaffold 3. Two blocks of Scaffold 3 comprising 1.6Mbp contained correctly ordered markers on Linkage Group 1. However, an assembly error occurred between these blocks.**

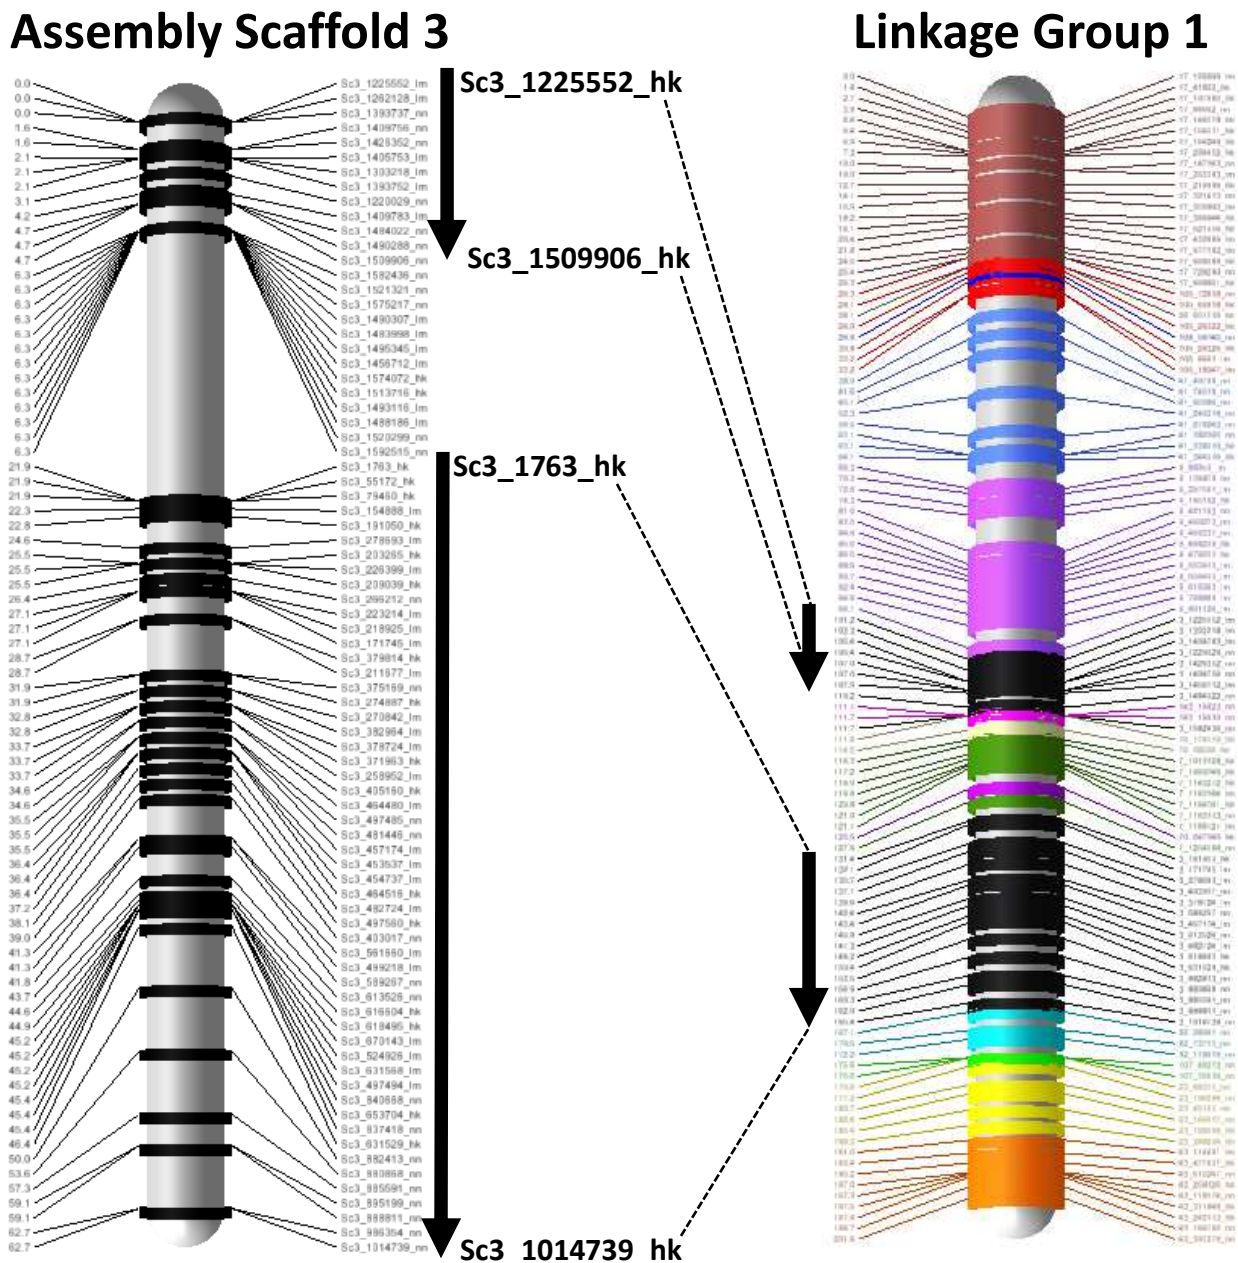

**Supplementary Figure 10:** Graphical genotypes for four progeny with co-occurring LOH tracts. Genotypes are designated as 1 (yellow) = RR, 2 (gray) = AR, and 3 (blue) = AA (R = reference allele and A = alternate allele). Parent (TN1 and TN2) and progeny (TN63, TN18, TN34, and TN47) genotypes span 38 markers and 53,404 nt on scaffold 2. Columns 4-6 list  $\chi^2$  test values (>0.05 in green). Column 7 lists “yes” if all non-LOH progeny are AR for an RR x AA marker. Columns 12 – 15 indicate gene context, the predicted reference amino acid (or “silent” if mutation is synonymous), the alternate amino acid, and the gene model. Note fixation of markers 2\_1447270 and 2\_1486458 for the reference and alternate allele and the three different composite haplotypes across the entire tract of LOH.

| SNP ID    | TN1 | TN2 | RR:AR | RR:AR:AA | AR:AA | Fix | TN63 | TN18 | TN34 | TN47 | Gene | Ref    | Alt | Gene Model                                   |
|-----------|-----|-----|-------|----------|-------|-----|------|------|------|------|------|--------|-----|----------------------------------------------|
| 2_1437332 | 2   | 1   | 0.58  | 0.00     | 0.00  |     | 3    | 3    | 1    | 1    | C    | Silent |     | e_gw1.2.451.1                                |
| 2_1437339 | 2   | 1   | 0.41  | 0.00     | 0.00  |     | 1    | 1    | 3    | 1    | C    | Silent |     | e_gw1.2.451.1                                |
| 2_1437367 | 1   | 2   | 0.68  | 0.00     | 0.00  |     | 1    | 1    | 1    | 1    | I    |        |     | e_gw1.2.451.1                                |
| 2_1437372 | 3   | 2   | 0.00  | 0.00     | 0.49  |     | 3    | 3    | 3    | 1    | I    |        |     | e_gw1.2.451.1                                |
| 2_1437398 | 2   | 1   | 0.41  | 0.00     | 0.00  |     | 1    | 1    | 3    | 1    | I    |        |     | e_gw1.2.451.1                                |
| 2_1437400 | 2   | 1   | 0.41  | 0.00     | 0.00  |     | 1    | 1    | 3    | 1    | I    |        |     | e_gw1.2.451.1                                |
| 2_1437402 | 2   | 1   | 0.41  | 0.00     | 0.00  |     | 1    | 1    | 3    | 1    | I    |        |     | e_gw1.2.451.1                                |
| 2_1437403 | 2   | 1   | 0.41  | 0.00     | 0.00  |     | 1    | 1    | 3    | 1    | I    |        |     | e_gw1.2.451.1                                |
| 2_1437404 | 2   | 1   | 0.41  | 0.00     | 0.00  |     | 1    | 1    | 3    | 1    | I    |        |     | e_gw1.2.451.1                                |
| 2_1441337 | 3   | 2   | 0.00  | 0.00     | 0.59  |     | 3    | 3    | 3    | 1    | C    | Silent |     | e_gw1.2.451.1                                |
| 2_1441385 | 1   | 2   | 0.59  | 0.00     | 0.00  |     | 1    | 1    | 1    | 1    | C    | Silent |     | e_gw1.2.451.1                                |
| 2_1441919 | 3   | 1   | 0.00  | 0.00     | 0.00  | Yes | 3    | 3    | 3    | 1    | C    | Silent |     | e_gw1.2.451.1                                |
| 2_1441939 | 1   | 2   | 0.89  | 0.00     | 0.00  |     | 1    | 1    | 1    | 1    | C    | P      | R   | e_gw1.2.451.1                                |
| 2_1441973 | 1   | 2   | 0.89  | 0.00     | 0.00  |     | 1    | 1    | 1    | 1    | C    | Silent |     | e_gw1.2.451.1                                |
| 2_1443263 | 3   | 2   | 0.00  | 0.00     | 0.49  |     | 3    | 3    | 3    | 1    | C    | Silent |     | e_gw1.2.451.1                                |
| 2_1447270 | 1   | 2   | 0.89  | 0.00     | 0.00  |     | 1    | 1    | 1    | 3    | C    | N      | H   | estExt2_fgenes1_pg.C_PHYCAscaffold_20222     |
| 2_1452313 | 3   | 2   | 0.00  | 0.00     | 0.49  |     | 3    | 3    | 3    | 1    | C    | Silent |     | fgenes2_kg.PHYCAscaffold_2_#_197_#_4100895:1 |
| 2_1452392 | 3   | 2   | 0.00  | 0.00     | 0.59  |     | 3    | 3    | 3    | 1    | C    | Silent |     | fgenes2_kg.PHYCAscaffold_2_#_197_#_4100895:1 |
| 2_1452394 | 3   | 2   | 0.00  | 0.00     | 0.59  |     | 3    | 3    | 3    | 1    | C    | Silent |     | fgenes2_kg.PHYCAscaffold_2_#_197_#_4100895:1 |
| 2_1456984 | 1   | 2   | 0.58  | 0.00     | 0.00  |     | 1    | 1    | 1    | 3    |      |        |     |                                              |
| 2_1457008 | 1   | 2   | 0.68  | 0.00     | 0.00  |     | 1    | 1    | 1    | 3    |      |        |     |                                              |
| 2_1482757 | 3   | 2   | 0.00  | 0.00     | 0.68  |     | 3    | 3    | 3    | 1    |      |        |     |                                              |
| 2_1482805 | 2   | 2   | 0.00  | 0.69     | 0.00  |     | 1    | 1    | 3    | 1    |      |        |     |                                              |
| 2_1482817 | 2   | 1   | 0.41  | 0.00     | 0.00  |     | 3    | 3    | 1    | 1    |      |        |     |                                              |
| 2_1482847 | 1   | 2   | 0.59  | 0.00     | 0.00  |     | 1    | 1    | 1    | 1    |      |        |     |                                              |
| 2_1482853 | 1   | 2   | 0.59  | 0.00     | 0.00  |     | 1    | 1    | 1    | 1    |      |        |     |                                              |
| 2_1482862 | 1   | 2   | 0.59  | 0.00     | 0.00  |     | 1    | 1    | 1    | 1    |      |        |     |                                              |
| 2_1484820 | 1   | 2   | 0.58  | 0.00     | 0.00  |     | 1    | 1    | 1    | 3    |      |        |     |                                              |
| 2_1486427 | 3   | 2   | 0.00  | 0.00     | 0.58  |     | 3    | 3    | 3    | 1    | C    | Silent |     | estExt2_fgenes1_pm.C_PHYCAscaffold_20199     |
| 2_1486428 | 3   | 2   | 0.00  | 0.00     | 0.58  |     | 3    | 3    | 3    | 1    | C    | Silent |     | estExt2_fgenes1_pm.C_PHYCAscaffold_20199     |
| 2_1486435 | 2   | 2   | 0.00  | 0.62     | 0.00  |     | 1    | 1    | 3    | 1    | C    | M      | K   | estExt2_fgenes1_pm.C_PHYCAscaffold_20199     |
| 2_1486458 | 3   | 2   | 0.00  | 0.00     | 0.58  |     | 3    | 3    | 3    | 1    | C    | A      | T   | estExt2_fgenes1_pm.C_PHYCAscaffold_20199     |
| 2_1487541 | 2   | 1   | 0.33  | 0.00     | 0.00  |     | 3    | 3    | 1    | 1    | I    |        |     | estExt2_fgenes1_pm.C_PHYCAscaffold_20199     |
| 2_1487551 | 2   | 1   | 0.33  | 0.00     | 0.00  |     | 3    | 3    | 1    | 1    | I    |        |     | estExt2_fgenes1_pm.C_PHYCAscaffold_20199     |
| 2_1487569 | 2   | 1   | 0.33  | 0.00     | 0.00  |     | 3    | 3    | 1    | 1    | I    |        |     | estExt2_fgenes1_pm.C_PHYCAscaffold_20199     |
| 2_1487581 | 2   | 1   | 0.33  | 0.00     | 0.00  |     | 3    | 3    | 1    | 1    | I    |        |     | estExt2_fgenes1_pm.C_PHYCAscaffold_20199     |
| 2_1487584 | 2   | 1   | 0.33  | 0.00     | 0.00  |     | 3    | 3    | 1    | 1    | I    |        |     | estExt2_fgenes1_pm.C_PHYCAscaffold_20199     |
| 2_1490736 | 2   | 2   | 0.01  | 0.71     | 0.00  |     | 1    | 1    | 3    | 1    | C    | Silent |     | estExt2_Genewise1.C_PHYCAscaffold_20980      |

**Supplementary Figure 11: Dendrogram of SNV cross correlations derived 23,809 SNVs from 2 parents and 69 putative progeny *P. capsici* isolates.** Isolate names on the left side of the panel correspond to the tree branches directly across on the right side. The same tree is reproduced on the bottom of the panel with isolate TN1 on the far left to create the cross diagonal. Correlations are designated by color legend at bottom of panel.

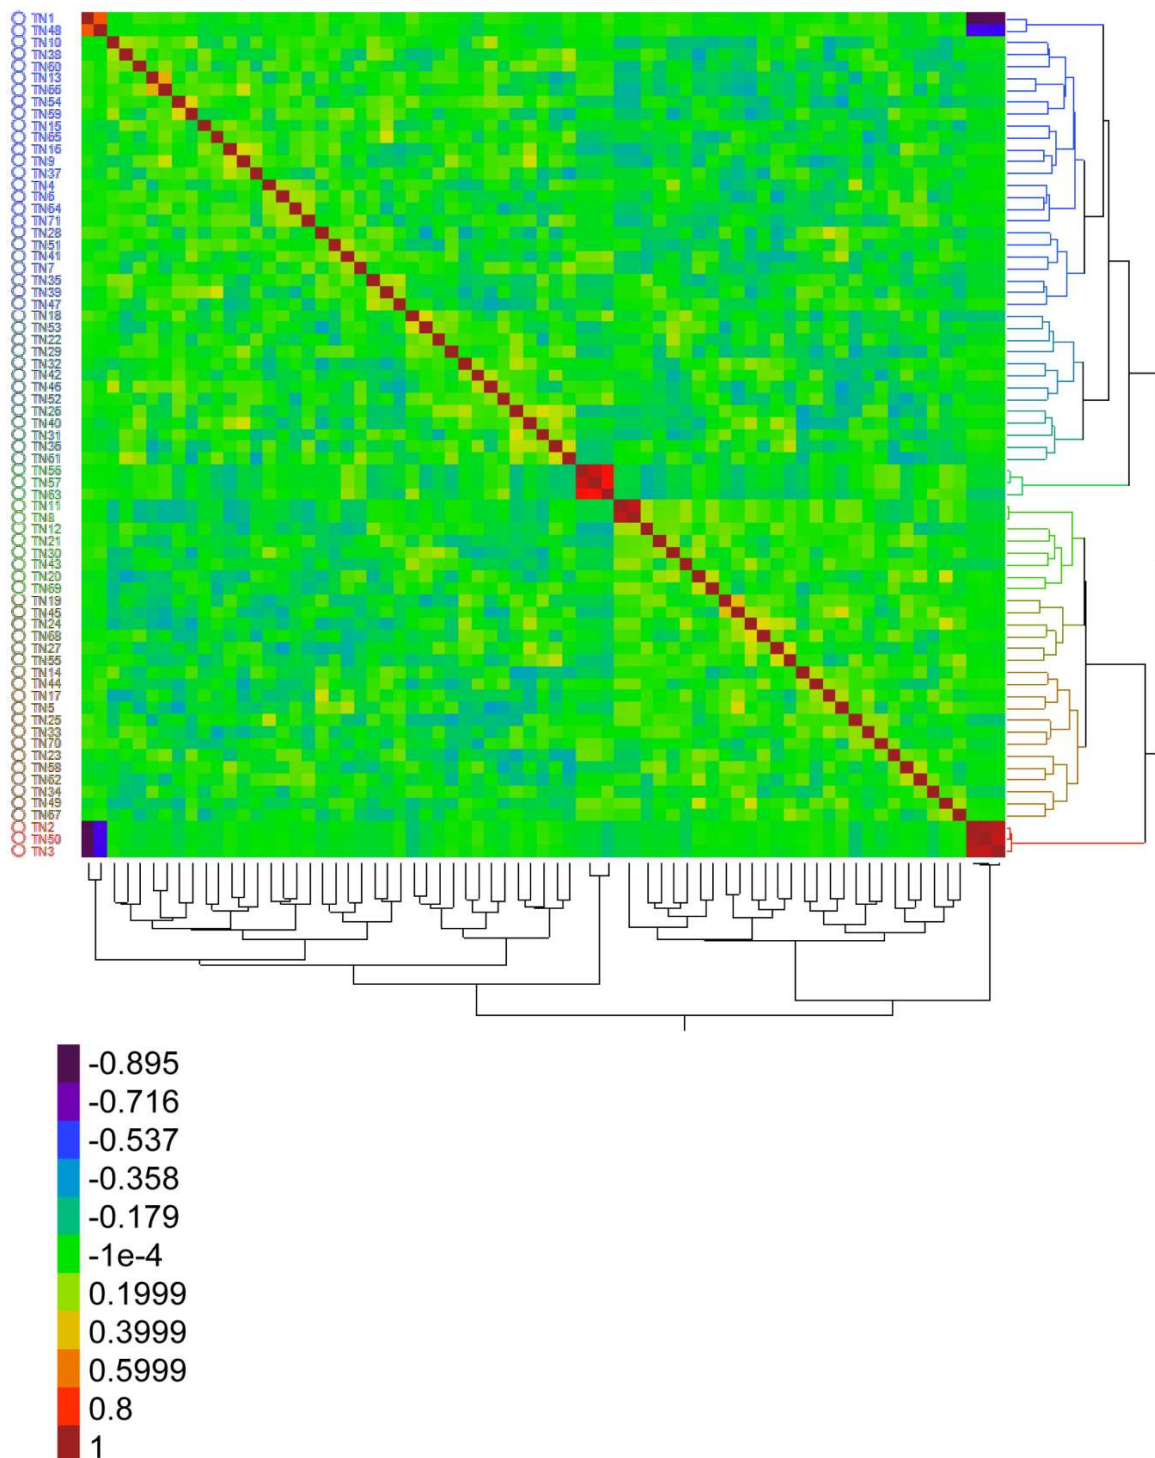

**Supplementary Table 1: Arachne hybrid assembly version11 (20 Aug 2010) of *P. capsici* LT1534 454-Titanium and Sanger gDNA reads.**

|                                                  |          |
|--------------------------------------------------|----------|
| <b>Scaffold count</b>                            | 917      |
| <b>Contig count</b>                              | 10,760   |
| <b>Scaffold bases total (Mbp)</b>                | 64       |
| <b>Contig sequence bases total (Mbp)</b>         | 56       |
| <b>Estimated % sequence bases in gaps</b>        | 12.5%    |
| <b>Scaffold N50 / L50 (# / kbp)</b>              | 29 / 706 |
| <b>Contig N50 / L50 (# / kbp)</b>                | 397 / 35 |
| <b>Number of scaffolds &gt; 50.0 Kb</b>          | 140      |
| <b>% in scaffolds &gt; 50.0 Kb</b>               | 91.9%    |
| <b>% assembly masked by repeats</b>              | 14.4%    |
| <b># finished cDNAs</b>                          | 1260     |
| <b>% finished cDNAs that align with assembly</b> | 97.1%    |

**Supplementary Table 2. *Phytophthora capsici* filtered gene models classified by prediction method.** Annotation v11 (20 August 2010) was produced by the JGI Annotation Pipeline, using a variety of cDNA-based, protein-based, and *ab initio* gene predictors.

| <b>Prediction method</b> | <b># models</b> |
|--------------------------|-----------------|
| Total                    | 19,805          |
| protein-based            | 14624 (74%)     |
| cDNA-based               | 2920 (15%)      |
| <i>ab initio</i>         | 2261 (11%)      |

**Supplementary Table 3. Properties of the 19,805 *P. capsici* filtered gene models, including genes with homology to transposable elements.**

| Property                                     | Value        |
|----------------------------------------------|--------------|
| Avg. gene length                             | 1253 nt      |
| Avg. transcript length                       | 1028 nt      |
| Avg. protein length                          | 314 aa       |
| Gene density (per Mbp scaffold)              | 309          |
| Avg. exon length                             | 467 nt       |
| Avg. intron length                           | 189 nt       |
| Avg. exon frequency                          | 2.2 per gene |
| Multi-exon genes                             | 9861 (50%)   |
| Genes with similarity to proteins in nr      | 14925 (75%)  |
| Genes in LT1534 multigene family             | 15489 (78%)  |
| Genes supported by ESTs                      | 9981 (50%)   |
| Genes with Pfam domain                       | 9234 (47%)   |
| Genes with signal peptide                    | 3162 (16%)   |
| Genes with transmembrane domain              | 2890 (15%)   |
| Genes with EC number                         | 2821 (14%)   |
| Genes with GO term                           | 8544 (43%)   |
| Complete models (with start and stop codons) | 69%          |

**Supplementary Table 4: Field isolates chosen for RAD sequencing (first 8 isolates)**

|                              | ID     | Host             | Year | Mating type | Location     | Species              |
|------------------------------|--------|------------------|------|-------------|--------------|----------------------|
| Parents of sequenced isolate | LT6503 | Snap Bean        | 2009 | A2          | Connecticut  | <i>P. capsici</i>    |
|                              | LT62   | Spaghetti Squash | 1998 | A2          | Michigan     | <i>P. capsici</i>    |
|                              | LT263  | Pumpkin          | 2004 | A2          | Tennessee    | <i>P. capsici</i>    |
|                              | LT2135 | Pepper           | 2006 | A2          | Peru         | <i>P. capsici</i>    |
| Clonal lineages              | LT5473 | Pepper           |      | A1          | New Mexico   | <i>P. capsici</i>    |
|                              | LT51   | Cucumber         | 1997 | A1          | Michigan     | <i>P. capsici</i>    |
|                              | LT6535 | Pepper           | 2008 | A1          | Argentina    | <i>P. capsici</i>    |
| Sequenced isolate            | LT232  | Rhododendron     | 2004 | A1          | Tennessee    | <i>P. tropicalis</i> |
|                              | LT1534 |                  |      | A2          | Lab (inbred) | <i>P. capsici</i>    |

**Supplementary Table 5: RAD sequencing statistics.**

| Isolate | Reads | Reads Aligned | Reads Uniquely Aligned |
|---------|-------|---------------|------------------------|
| LT6503  | 8.1 M | 7.0 M (86%)   | 6.0 M (73%)            |
| LT62    | 7.8 M | 6.8 M (86%)   | 5.8 M (74%)            |
| LT263   | 8.1 M | 7.2 M (88%)   | 6.2 M (76%)            |
| LT2135  | 7.4 M | 6.4 M (86%)   | 5.4 M (73%)            |
| LT5473  | 8.4 M | 7.2 M (85%)   | 6.1 M (72%)            |
| LT51    | 8.5 M | 7.4 M (87%)   | 6.3 M (74%)            |
| LT6535  | 5.9 M | 5.1 M (85%)   | 4.3 M (72%)            |
| LT232   | 5.0 M | 0.8 M (16%)   | 0.7 M (14%)            |

**Supplementary Table 6: Single nucleotide variants (SNV) in RAD sequenced isolates.**

| Sample | Nt with $\geq$ 30X coverage | SNVs   | SNVs/kb |
|--------|-----------------------------|--------|---------|
| LT6503 | 1,761,096                   | 20,445 | 24.88   |
| LT62   | 1,714,370                   | 17,914 | 22.08   |
| LT263  | 1,829,566                   | 14,637 | 16.87   |
| LT2135 | 1,631,155                   | 20,869 | 25.52   |
| LT5473 | 1,760,096                   | 21,386 | 26.04   |
| LT51   | 1,903,934                   | 18,527 | 22.30   |
| LT6535 | 1,597,281                   | 22,431 | 25.88   |
| LT232  |                             |        | 51.67   |

SNV detection required at least 30X coverage of that nucleotide in all samples and at least 4 uniquely aligning reads with Q scores of at least 20 to call the variants. The *P. tropicalis* (LT232)/*P. capsici* SNV/kb ratios were identical at both 10X and 30X coverage and in comparisons of all samples. These SNV densities are conservative because the regions had to contain the 6 nt invariant endonuclease site and sufficient reads to align at 90% identity in order to meet the 30X cutoff. Densities were increased to ~26/kb when the coverage requirement was decreased to 10X, and to ~33/kb when the restriction for 30X coverage in the *P. tropicalis* isolate was waived.

**Supplementary Table 7: Distribution of SNVs among seven *P. capsici* isolates and one *P. tropicalis* isolate.** Bi-allelic SNVs = 59,471; tri-allelic SNVs = 2,413; tetra allelic SNVs = 80; total SNVs = 61,964

| # isolates with a given SNP | Number of SNPs |
|-----------------------------|----------------|
| 1                           | 34,065         |
| 2                           | 8,447          |
| 3                           | 5,470          |
| 4                           | 4,265          |
| 5                           | 3,479          |
| 6                           | 3,243          |
| 7                           | 4,309          |
| 8                           | 1,259          |

**Supplementary Table 8. Summary statistics of RAD sequences generated for the parents and 69 putative progeny.**

|           | Parents and Progeny | Parents   | Progeny     |
|-----------|---------------------|-----------|-------------|
| Total     | 158,460,781         | 9,588,155 | 148,872,626 |
| Mean      | 2,231,842           | 4,794,078 | 2,157,574   |
| Median    | 1,655,467           | 4,794,078 | 1,646,382   |
| Std. Dev. | 1,602,718           | 138,864   | 1,563,741   |
| Min.      | 594,851             | 4,695,886 | 594,851     |
| Max.      | 8,951,606           | 4,892,269 | 8,951,606   |



**Supplementary Table 9. Summary of the markers for each of the linkage groups.** The parental isolates differed at ~25% of the 20,568 loci. TN1 had 5273 RR, 8632 AR, and 6663 AA genotypes, whereas TN2 had 8141 RR, 11767 AR, and 660 AA genotypes (where R = reference allele and A = alternate allele). The smaller proportion of AA genotypes in TN2 reflected its use in backcrosses that produced LT1534, the reference genome.

| <b>Linkage Group</b> | <b>SNPs</b>  | <b>RR:AR</b> | <b>AR:AR</b> | <b>AR:AA</b> | <b>AA:RR</b> |
|----------------------|--------------|--------------|--------------|--------------|--------------|
| <b>1</b>             | 3003         | 1576         | 453          | 519          | 455          |
| <b>2</b>             | 1277         | 625          | 275          | 264          | 113          |
| <b>3</b>             | 1324         | 702          | 204          | 253          | 165          |
| <b>4</b>             | 532          | 269          | 139          | 98           | 26           |
| <b>5</b>             | 1621         | 807          | 264          | 333          | 217          |
| <b>6</b>             | 839          | 448          | 122          | 156          | 113          |
| <b>7</b>             | 448          | 231          | 51           | 92           | 74           |
| <b>8</b>             | 1493         | 865          | 210          | 274          | 144          |
| <b>9</b>             | 925          | 465          | 161          | 159          | 140          |
| <b>10</b>            | 2940         | 1330         | 447          | 684          | 479          |
| <b>11</b>            | 1412         | 704          | 138          | 219          | 351          |
| <b>12</b>            | 871          | 386          | 108          | 279          | 98           |
| <b>13</b>            | 933          | 493          | 94           | 198          | 148          |
| <b>14</b>            | 547          | 217          | 50           | 63           | 217          |
| <b>15</b>            | 687          | 319          | 242          | 104          | 22           |
| <b>16</b>            | 1231         | 493          | 43           | 293          | 402          |
| <b>17</b>            | 371          | 134          | 80           | 63           | 94           |
| <b>18</b>            | 114          | 78           | 22           | 0            | 14           |
| <b>Total</b>         | <b>20568</b> | <b>10142</b> | <b>3103</b>  | <b>4051</b>  | <b>3272</b>  |

**Supplementary Table 10. Summary of genic and non-genic markers showing simple Mendelian inheritance.**

| Linkage Group | Coding Silent | Coding      |             |             |            | Non-Gene    | Genes Per Linkage Group | Total Genes in Linkage Groups |
|---------------|---------------|-------------|-------------|-------------|------------|-------------|-------------------------|-------------------------------|
|               |               | Non-Silent  | Intron      | 3'          | 5'         |             |                         |                               |
| <b>1</b>      | 858           | 488         | 382         | 215         | 48         | 1012        | 716                     | 2,271                         |
| <b>2</b>      | 384           | 218         | 107         | 82          | 32         | 454         | 309                     | 1,016                         |
| <b>3</b>      | 392           | 187         | 160         | 96          | 27         | 462         | 382                     | 1,146                         |
| <b>4</b>      | 176           | 89          | 26          | 24          | 14         | 203         | 140                     | 648                           |
| <b>5</b>      | 450           | 286         | 170         | 97          | 25         | 593         | 371                     | 1,392                         |
| <b>6</b>      | 274           | 144         | 43          | 37          | 17         | 324         | 152                     | 646                           |
| <b>7</b>      | 111           | 66          | 44          | 21          | 4          | 202         | 91                      | 467                           |
| <b>8</b>      | 427           | 238         | 114         | 77          | 18         | 619         | 365                     | 1,087                         |
| <b>9</b>      | 277           | 157         | 96          | 80          | 16         | 299         | 242                     | 1,076                         |
| <b>10</b>     | 800           | 492         | 355         | 196         | 47         | 1050        | 645                     | 1,941                         |
| <b>11</b>     | 378           | 244         | 124         | 75          | 30         | 561         | 357                     | 1,267                         |
| <b>12</b>     | 249           | 141         | 51          | 64          | 13         | 353         | 197                     | 870                           |
| <b>13</b>     | 285           | 147         | 57          | 47          | 16         | 381         | 190                     | 778                           |
| <b>14</b>     | 164           | 100         | 36          | 26          | 15         | 206         | 203                     | 570                           |
| <b>15</b>     | 207           | 104         | 63          | 42          | 6          | 265         | 178                     | 655                           |
| <b>16</b>     | 322           | 204         | 130         | 100         | 25         | 450         | 288                     | 1,194                         |
| <b>17</b>     | 95            | 62          | 23          | 27          | 6          | 158         | 157                     | 546                           |
| <b>18</b>     | 23            | 15          | 12          | 4           | 1          | 59          | 34                      | 119                           |
| <b>Total</b>  | <b>5872</b>   | <b>3382</b> | <b>1993</b> | <b>1310</b> | <b>360</b> | <b>7651</b> | <b>5017</b>             | <b>17,689</b>                 |

**Supplementary Table 11. Summary for linkage of scaffolds breaking into blocks with LOD scores  $\geq 7$ .**

| <b>Scaffold Block</b> | <b>Lowest Marker</b> | <b>Highest Marker</b> | <b>Total Covered</b> | <b>Linkage Group</b> |
|-----------------------|----------------------|-----------------------|----------------------|----------------------|
| Sc1.1                 | 1_53205              | 1_945508              | 892303               | LG9                  |
| Sc1.2                 | 1_1041839            | 1_1173436             | 131597               | LG2                  |
| Sc1.3                 | 1_1283380            | 1_2077147             | 793767               | LG11                 |
| Sc2.1                 | 2_113526             | 2_546537              | 433011               | LG13                 |
| Sc2.2                 | 2_731366             | 2_1916562             | 1185196              | LG10                 |
| Sc4.1                 | 4_87661              | 4_936084              | 848423               | LG10                 |
| Sc4.2                 | 4_953874             | 4_1526218             | 572344               | LG12                 |
| Sc7.1                 | 7_95189              | 7_945588              | 850399               | LG13                 |
| Sc7.2                 | 7_961256             | 7_1255438             | 294182               | LG1                  |
| Sc12.1                | 12_27274             | 12_214345             | 187071               | LG18                 |
| Sc12.2                | 12_711003            | 12_1052066            | 341063               | LG14                 |
| Sc13.1                | 13_112552            | 13_176739             | 64187                | LG11                 |
| Sc13.2                | 13_290642            | 13_1028147            | 737505               | LG2                  |
| Sc14.1                | 14_454507            | 14_856026             | 401519               | LG14                 |
| Sc14.2                | 14_893013            | 14_991161             | 98148                | LG11                 |
| Sc18.1                | 18_98284             | 18_475978             | 377694               | LG11                 |
| Sc18.2                | 18_597329            | 18_965332             | 368003               | LG2                  |
| Sc21.1                | 21_96574             | 21_533490             | 436916               | LG2                  |
| Sc21.2                | 21_630881            | 21_910293             | 279412               | LG5                  |
| Sc22.1                | 22_56130             | 22_491901             | 435771               | LG3                  |
| Sc22.2                | 22_536539            | 22_839077             | 302538               | LG08                 |
| Sc23.1                | 23_45180             | 23_357600             | 312420               | LG1                  |
| Sc23.2                | 23_653052            | 23_764546             | 111494               | LG2                  |
| Sc24.1                | 24_9834              | 24_190368             | 180534               | LG7                  |
| Sc24.2                | 24_227914            | 24_769629             | 541715               | LG5                  |
| Sc25.1                | 25_17541             | 25_427916             | 410375               | LG15                 |
| Sc25.2                | 25_657899            | 25_803448             | 145549               | LG6                  |
| Sc26.1                | 26_63597             | 26_631721             | 568124               | LG8                  |
| Sc26.2                | 26_641731            | 26_706136             | 64405                | LG1                  |
| Sc42.1                | 42_26570             | 42_320442             | 293872               | LG14                 |
| Sc42.2                | 42_349280            | 42_479514             | 130234               | LG17                 |
| Sc48.1                | 48_22671             | 48_192342             | 169671               | LG10                 |
| Sc48.2                | 48_212975            | 48_350345             | 137370               | LG3                  |

**Supplementary Table 12. Summary data for linkage groups and scaffold blocks.**

| <b>LG/order</b> | <b>Scaffold Block</b> | <b>Scaffold Block Size</b> | <b>LG Total Nts</b> |
|-----------------|-----------------------|----------------------------|---------------------|
| LG01.01         | Sc43                  | 531,961                    |                     |
| LG01.02         | Sc23.1                | 312,420                    |                     |
| LG01.03         | Sc82                  | 207,552                    |                     |
| LG01.04         | Sc107                 | 135,171                    |                     |
| LG01.05         | Sc3                   | 1,611,504                  |                     |
| LG01.06         | Sc70                  | 280,435                    |                     |
| LG01.07         | Sc7.2                 | 294,182                    |                     |
| LG01.08         | Sc9                   | 1,114,135                  |                     |
| LG01.09         | Sc41                  | 565,801                    |                     |
| LG01.10         | Sc109                 | 125,037                    |                     |
| LG01.11         | Sc26.2                | 64,405                     |                     |
| LG01.12         | Sc105                 | 102,149                    |                     |
| LG01.13         | Sc17                  | 985,188                    | <b>6,329,940</b>    |
| LG02.01         | Sc13.2                | 737,505                    |                     |
| LG02.02         | Sc23.2                | 111,494                    |                     |
| LG02.03         | Sc172                 | 15,116                     |                     |
| LG02.04         | Sc11                  | 1,076,090                  |                     |
| LG02.05         | Sc18.2                | 368,003                    |                     |
| LG02.06         | Sc1.2                 | 131,597                    |                     |
| LG02.07         | Sc21.1                | 436,916                    | <b>2,876,721</b>    |
| LG03.01         | Sc48.2                | 137,370                    |                     |
| LG03.02         | Sc95                  | 141,949                    |                     |
| LG03.03         | Sc30                  | 669,438                    |                     |
| LG03.04         | Sc65                  | 307,771                    |                     |
| LG03.05         | Sc37                  | 577,888                    |                     |
| LG03.06         | Sc51                  | 529,628                    |                     |
| LG03.07         | Sc22.1                | 435,771                    |                     |
| LG03.08         | Sc64                  | 301,055                    |                     |
| LG03.09         | Sc102                 | 120,866                    |                     |
| LG03.10         | Sc560                 | 6,948                      |                     |
| LG03.11         | Sc800                 | 3,230                      | <b>3,231,914</b>    |
| LG04.01         | Sc6                   | 1,423,605                  |                     |
| LG04.02         | Sc86                  | 162,230                    |                     |
| LG04.03         | Sc44                  | 536,020                    | <b>2,121,855</b>    |
| LG05.01         | Sc10                  | 1,190,366                  |                     |
| LG05.02         | Sc63                  | 355,987                    |                     |
| LG05.03         | Sc68                  | 334,182                    |                     |
| LG05.04         | Sc24.2                | 541,715                    |                     |
| LG05.05         | Sc50                  | 475,612                    |                     |
| LG05.06         | Sc21.2                | 279,412                    |                     |
| LG05.07         | Sc52                  | 444,141                    |                     |
| LG05.08         | Sc80                  | 185,445                    |                     |

|         |        |           |                  |
|---------|--------|-----------|------------------|
| LG05.09 | Sc60   | 366,873   |                  |
| LG05.10 | Sc67   | 292,061   |                  |
| LG05.11 | Sc112  | 78,237    | <b>4,544,031</b> |
| LG06.01 | Sc87   | 182,599   |                  |
| LG06.02 | Sc118  | 67,328    |                  |
| LG06.03 | Sc139  | 29,350    |                  |
| LG06.04 | Sc191  | 15,330    |                  |
| LG06.05 | Sc93   | 150,113   |                  |
| LG06.06 | Sc108  | 116,431   |                  |
| LG06.07 | Sc25.2 | 145,549   |                  |
| LG06.08 | Sc89   | 163,789   |                  |
| LG06.09 | Sc81   | 202,973   |                  |
| LG06.10 | Sc132  | 34,092    |                  |
| LG06.11 | Sc39   | 591,971   |                  |
| LG06.12 | Sc92   | 170,487   |                  |
| LG06.13 | Sc74   | 127,009   | <b>1,997,021</b> |
| LG07.01 | Sc24.1 | 180,534   |                  |
| LG07.02 | Sc106  | 144,267   |                  |
| LG07.03 | Sc77   | 232,015   |                  |
| LG07.04 | Sc16   | 1,020,712 | <b>1,577,528</b> |
| LG08.01 | Sc26.1 | 568,124   |                  |
| LG08.02 | Sc8    | 1,194,346 |                  |
| LG08.03 | Sc161  | 37,761    |                  |
| LG08.04 | Sc22.2 | 302,538   |                  |
| LG08.05 | Sc58   | 327,658   |                  |
| LG08.06 | Sc72   | 230,452   |                  |
| LG08.07 | Sc66   | 294,895   |                  |
| LG08.08 | Sc62   | 322,952   | <b>3,278,726</b> |
| LG09.01 | Sc5    | 1,593,284 |                  |
| LG09.02 | Sc100  | 129,988   |                  |
| LG09.03 | Sc103  | 136,111   |                  |
| LG09.04 | Sc1.1  | 892,303   |                  |
| LG09.05 | Sc90   | 152,720   | <b>2,904,406</b> |
| LG10.01 | Sc34   | 622,686   |                  |
| LG10.02 | Sc40   | 570,383   |                  |
| LG10.03 | Sc4.1  | 848,423   |                  |
| LG10.04 | Sc27   | 705,730   |                  |
| LG10.05 | Sc2.2  | 1,185,196 |                  |
| LG10.06 | Sc84   | 182,275   |                  |
| LG10.07 | Sc49   | 508,508   |                  |
| LG10.08 | Sc48.1 | 169,671   |                  |
| LG10.09 | Sc28   | 757,753   |                  |
| LG10.10 | Sc79   | 222,129   | <b>5,772,754</b> |
| LG11.01 | Sc1.3  | 793,767   |                  |
| LG11.02 | Sc32   | 608,388   |                  |
| LG11.03 | Sc97   | 154,197   |                  |

|               |            |           |                  |
|---------------|------------|-----------|------------------|
| LG11.04       | Sc18.1     | 377,694   |                  |
| LG11.05       | Sc29       | 707,326   |                  |
| LG11.06       | Sc31       | 686,815   |                  |
| LG11.07       | Sc14.2     | 98,148    |                  |
| LG11.08       | Sc13.1     | 64,187    | <b>3,490,522</b> |
| LG12.01       | Sc71       | 252,329   |                  |
| LG12.02       | Sc38       | 550,336   |                  |
| LG12.03       | Sc94       | 190,298   |                  |
| LG12.04       | Sc53       | 465,517   |                  |
| LG12.05       | Sc91       | 167,065   |                  |
| LG12.06       | Sc4.2      | 572,344   |                  |
| LG12.07       | Sc57       | 397,303   | <b>2,595,192</b> |
| LG13.01       | Sc36       | 679,425   |                  |
| LG13.02       | Sc111      | 91,577    |                  |
| LG13.03       | Sc2.1      | 1,925,921 |                  |
| LG13.04       | Sc61       | 347,729   |                  |
| LG13.05       | Sc7.1      | 850,399   | <b>3,895,051</b> |
| LG14.01       | Sc12.2     | 341,063   |                  |
| LG14.02       | Sc14.1     | 401,519   |                  |
| LG14.03       | Sc42.1     | 293,872   |                  |
| LG14.04       | Sc101      | 136,107   | <b>1,172,561</b> |
| LG15.01       | Sc15       | 1,032,281 |                  |
| LG15.02       | Sc25.1     | 410,375   |                  |
| LG15.03       | Sc46       | 525,601   | <b>1,968,257</b> |
| LG16.01       | Sc20       | 899,172   |                  |
| LG16.02       | Sc19       | 944,885   |                  |
| LG16.03       | Sc33       | 640,966   |                  |
| LG16.04       | Sc35       | 603,175   |                  |
| LG16.05       | Sc55       | 463,907   | <b>3,552,105</b> |
| LG17.01       | Sc104      | 135,144   |                  |
| LG17.02       | Sc42.2     | 130,234   |                  |
| LG17.03       | Sc47       | 556,112   |                  |
| LG17.04       | Sc54       | 427,428   |                  |
| LG17.05       | Sc85       | 206,069   |                  |
| LG17.06       | Sc73       | 348,431   | <b>1,803,418</b> |
| LG18.01       | Sc12.1     | 187,071   |                  |
| LG18.02       | Sc78       | 194,772   | <b>381,843</b>   |
| <b>Totals</b> | <b>125</b> |           | <b>53709626</b>  |

**Supplementary Table 13. Flanking markers and tract lengths for isolates with loss of heterozygosity.**

| Linkage Group | Isolate | 1st LOH   | Last LOH  | Tract Length |
|---------------|---------|-----------|-----------|--------------|
| LG01          | TN37    | 3_1774    | 3_901039  | 899265       |
| LG01          | TN37    | 3_956368  | 3_1023899 | 67531        |
| LG01          | TN60    | 3_1032846 | 3_1165737 | 132891       |
| LG01          | TN65    | 3_1032846 | 3_1165737 | 132891       |
| LG01          | TN37    | 7_960715  | 7_1232128 | 271413       |
| LG01          | TN37    | 9_76547   | 9_313726  | 237179       |
| LG01          | TN37    | 17_31860  | 17_976370 | 944510       |
| LG01          | TN47    | 17_29488  | 17_870195 | 840707       |
| LG01          | TN37    | 23_32662  | 23_422316 | 389654       |
| LG01          | TN37    | 26_642307 | 26_711717 | 69410        |
| LG01          | TN37    | 41_23637  | 41_340818 | 317181       |
| LG01          | TN37    | 43_20676  | 43_531378 | 510702       |
| LG01          | TN37    | 70_203860 | 70_279147 | 75287        |
| LG01          | TN37    | 82_27984  | 82_206524 | 178540       |
| LG01          | TN37    | 105_6822  | 105_76260 | 69438        |
| LG01          | TN47    | 105_51382 | 105_63734 | 12352        |
| LG01          | TN37    | 107_2162  | 107_50059 | 47897        |
| LG01          | TN37    | 109_25479 | 109_78466 | 52987        |
| LG03          | TN15    | 30_22501  | 30_610494 | 587993       |
| LG03          | TN31    | 30_22501  | 30_610494 | 587993       |
| LG03          | TN15    | 48_309043 | 48_463219 | 154176       |
| LG03          | TN31    | 48_203358 | 48_463219 | 259861       |
| LG03          | TN31    | 65_43166  | 65_189594 | 146428       |
| LG03          | TN15    | 95_68974  | 95_100010 | 31036        |
| LG03          | TN31    | 95_11127  | 95_120313 | 109186       |
| LG04          | TN25    | 6_517600  | 6_1330434 | 812834       |
| LG06          | TN45    | 39_45571  | 39_218172 | 172601       |
| LG06          | TN45    | 39_269905 | 39_467526 | 197621       |
| LG06          | TN45    | 74_57229  | 74_92332  | 35103        |
| LG06          | TN45    | 81_83924  | 81_172214 | 88290        |
| LG06          | TN37    | 87_72040  | 87_152869 | 80829        |
| LG06          | TN45    | 89_41061  | 89_116125 | 75064        |
| LG06          | TN45    | 92_10433  | 92_128655 | 118222       |
| LG06          | TN45    | 132_10333 | 132_22914 | 12581        |
| LG07          | TN60    | 16_155019 | 16_945332 | 790313       |
| LG07          | TN65    | 16_134053 | 16_974846 | 840793       |
| LG08          | TN3     | 8_159857  | 8_160156  | 299          |
| LG08          | TN47    | 8_148811  | 8_1163217 | 1014406      |
| LG08          | TN13    | 26_91745  | 26_340248 | 248503       |
| LG08          | TN3     | 26_142703 | 26_609109 | 466406       |

|      |      |           |           |        |
|------|------|-----------|-----------|--------|
| LG08 | TN47 | 26_63564  | 26_620971 | 557407 |
| LG08 | TN37 | 66_126127 | 66_190579 | 64452  |
| LG09 | TN50 | 1_87441   | 1_742969  | 655528 |
| LG09 | TN50 | 90_44554  | 90_110297 | 65743  |
| LG10 | TN18 | 2_734379  | 2_1650759 | 916380 |
| LG10 | TN34 | 2_734379  | 2_1555552 | 821173 |
| LG10 | TN47 | 2_932367  | 2_1752644 | 820277 |
| LG10 | TN53 | 2_734379  | 2_1062403 | 328024 |
| LG10 | TN63 | 2_734379  | 2_1650759 | 916380 |
| LG10 | TN18 | 4_86143   | 4_936679  | 850536 |
| LG10 | TN34 | 4_86143   | 4_936679  | 850536 |
| LG10 | TN47 | 4_42590   | 4_936704  | 894114 |
| LG10 | TN52 | 4_86143   | 4_936679  | 850536 |
| LG10 | TN53 | 4_86143   | 4_936679  | 850536 |
| LG10 | TN63 | 4_86143   | 4_936679  | 850536 |
| LG10 | TN18 | 27_8619   | 27_697509 | 688890 |
| LG10 | TN34 | 27_8619   | 27_697509 | 688890 |
| LG10 | TN47 | 27_1128   | 27_697509 | 696381 |
| LG10 | TN52 | 27_8619   | 27_297350 | 288731 |
| LG10 | TN53 | 27_8619   | 27_697509 | 688890 |
| LG10 | TN63 | 27_8619   | 27_697509 | 688890 |
| LG10 | TN18 | 28_38583  | 28_704354 | 665771 |
| LG10 | TN18 | 34_47706  | 34_548650 | 500944 |
| LG10 | TN34 | 34_47706  | 34_548650 | 500944 |
| LG10 | TN47 | 34_27259  | 34_571709 | 544450 |
| LG10 | TN52 | 34_47706  | 34_548650 | 500944 |
| LG10 | TN53 | 34_47706  | 34_548650 | 500944 |
| LG10 | TN63 | 34_47706  | 34_548650 | 500944 |
| LG10 | TN18 | 40_53500  | 40_510721 | 457221 |
| LG10 | TN34 | 40_53500  | 40_510721 | 457221 |
| LG10 | TN47 | 40_53500  | 40_510721 | 457221 |
| LG10 | TN52 | 40_53500  | 40_510721 | 457221 |
| LG10 | TN53 | 40_53500  | 40_510721 | 457221 |
| LG10 | TN63 | 40_53500  | 40_510721 | 457221 |
| LG10 | TN18 | 48_66747  | 48_185568 | 118821 |
| LG10 | TN18 | 49_163203 | 49_500583 | 337380 |
| LG10 | TN18 | 79_90923  | 79_155337 | 64414  |
| LG10 | TN18 | 84_57519  | 84_178288 | 120769 |
| LG10 | TN63 | 84_57519  | 84_177335 | 119816 |
| LG11 | TN54 | 1_1282528 | 1_2051166 | 768638 |
| LG11 | TN54 | 18_96129  | 18_475984 | 379855 |
| LG11 | TN62 | 31_358469 | 31_633967 | 275498 |
| LG11 | TN54 | 32_50547  | 32_548375 | 497828 |
| LG11 | TN54 | 97_62889  | 97_123104 | 60215  |
| LG12 | TN64 | 4_1416514 | 4_1526252 | 109738 |



|      |      |           |           |        |
|------|------|-----------|-----------|--------|
| LG12 | TN64 | 53_92504  | 53_418139 | 325635 |
| LG12 | TN64 | 57_52048  | 57_123257 | 71209  |
| LG12 | TN64 | 91_44469  | 91_134135 | 89666  |
| LG13 | TN63 | 7_132139  | 7_207249  | 75110  |
| LG13 | TN63 | 7_346854  | 7_427074  | 80220  |
| LG13 | TN66 | 36_95503  | 36_626762 | 531259 |
| LG15 | TN17 | 15_476066 | 15_890139 | 414073 |
| LG15 | TN44 | 15_476066 | 15_838906 | 362840 |
| LG16 | TN25 | 19_412214 | 19_765034 | 352820 |
| LG16 | TN37 | 19_412214 | 19_765034 | 352820 |
| LG16 | TN70 | 19_412214 | 19_765034 | 352820 |
| LG16 | TN25 | 33_58644  | 33_570713 | 512069 |
| LG16 | TN37 | 33_58644  | 33_570713 | 512069 |
| LG16 | TN58 | 33_508481 | 33_570693 | 62212  |
| LG16 | TN70 | 33_58644  | 33_570713 | 512069 |
| LG16 | TN23 | 35_141346 | 35_556998 | 415652 |
| LG16 | TN25 | 35_141346 | 35_556998 | 415652 |
| LG16 | TN37 | 35_141346 | 35_556998 | 415652 |
| LG16 | TN58 | 35_141346 | 35_556998 | 415652 |
| LG16 | TN70 | 35_141346 | 35_556998 | 415652 |
| LG16 | TN23 | 55_62577  | 55_381570 | 318993 |
| LG16 | TN25 | 55_25260  | 55_381570 | 356310 |
| LG17 | TN47 | 85_67570  | 73_215288 | 147718 |

---

**Supplementary Table 14. Summary of total nucleotides affected by LOH per isolate.**

| <b>Isolate</b> | <b>Total LOH Coverage</b> |
|----------------|---------------------------|
| TN13           | 248,503                   |
| TN62           | 275,498                   |
| TN44           | 362,840                   |
| TN17           | 414,073                   |
| TN03           | 466,705                   |
| TN58           | 477,864                   |
| TN66           | 531,259                   |
| TN64           | 596,248                   |
| TN45           | 699,482                   |
| TN50           | 721,271                   |
| TN23           | 734,645                   |
| TN15           | 773,205                   |
| TN60           | 923,204                   |
| TN65           | 973,684                   |
| TN31           | 1,103,468                 |
| TN70           | 1,280,541                 |
| TN54           | 1,706,536                 |
| TN52           | 2,097,432                 |
| TN25           | 2,449,685                 |
| TN53           | 2,825,615                 |
| TN34           | 3,318,764                 |
| TN63           | 3,689,117                 |
| TN18           | 4,721,126                 |
| TN37           | 5,556,816                 |
| TN47           | 5,985,033                 |

**Supplementary Table 15. Source and version of genomes used for CEGMA analysis.**

| Organism                            | Source                                                                                                                                                                                              | Genome version | Reference              |
|-------------------------------------|-----------------------------------------------------------------------------------------------------------------------------------------------------------------------------------------------------|----------------|------------------------|
| <i>Phytophthora ramorum</i>         | <a href="http://genome.jgi.doe.gov/Phyra1_1/Phyra1_1.download.ftp.html">http://genome.jgi.doe.gov/Phyra1_1/Phyra1_1.download.ftp.html</a>                                                           | 1.0            | Tyler et al. (2006)    |
| <i>Phytophthora sojae</i>           | <a href="http://genome.jgi-psf.org/Physo3/Physo3.home.html">http://genome.jgi-psf.org/Physo3/Physo3.home.html</a>                                                                                   | 3.0            | Tyler et al. (2006)    |
| <i>Phytophthora capsici</i>         | <a href="http://genome.jgi-psf.org/PhycaF7/PhycaF7.home.html">http://genome.jgi-psf.org/PhycaF7/PhycaF7.home.html</a>                                                                               | 11.0           |                        |
| <i>Phytophthora infestans</i>       | <a href="http://www.broadinstitute.org/annotation/genome/phytophthora_infestans/MultiDownloads.html">http://www.broadinstitute.org/annotation/genome/phytophthora_infestans/MultiDownloads.html</a> | 4.1            | Haas et al. (2009)     |
| <i>Pythium ultimum</i>              | <a href="http://pythium.plantbiology.msu.edu/download.html">http://pythium.plantbiology.msu.edu/download.html</a>                                                                                   | Release 1      | Levesque et al. (2010) |
| <i>Hyaloperonospora arabidopsis</i> | <a href="http://vmd.vbi.vt.edu/download/index.php">http://vmd.vbi.vt.edu/download/index.php</a>                                                                                                     | 8.3.2          | Baxter et al. (2010)   |

**Supplementary Table 16. Predicted Crinkler amino acid sequences and gene names.**

| Gene Name                      | Amino Acid sequence                                                                                                                                                                                                                                                                                                                                                                                                                                                                                                                                                                                                                                                                                                                                                                                                                                                                                                                      |
|--------------------------------|------------------------------------------------------------------------------------------------------------------------------------------------------------------------------------------------------------------------------------------------------------------------------------------------------------------------------------------------------------------------------------------------------------------------------------------------------------------------------------------------------------------------------------------------------------------------------------------------------------------------------------------------------------------------------------------------------------------------------------------------------------------------------------------------------------------------------------------------------------------------------------------------------------------------------------------|
| >jgil104199le_g<br>w1.9.417.1  | MVKLFCAIVGEAGSAFSVEVDETDSVDDLKTAIKAVNEDITCPPRKLQLFLAKKADGT<br>WLDGAGAAAVTVDEADRVPMLMLDKHGNHHKFKMNP LLWIKNDQHFGENFRPVHV<br>VVVVPDV AHAQTGLWLVTGFVKNALNTKGIRCKLYWMATLRIGY YDPARRTDKKNV<br>AFWYEDTKLCFHVLFETKDAALLFETDLRIEPTLGSPLTNQVVETRVAPVNAVSTELQ<br>RVFYGDYVPDDSKSPQNSVSSISLTTSGSNLDSSTDEFRRFORIEHEKFFLPYGKAESCHLV<br>SRKQSRNHKREFAKYDRDSNSRLALS RDMHGWF DGM SIEVPIVNMLPGSVKENQSIGN<br>RRKVVVEVFKVLDAGCTDRVFSRLKEGSTTTNDPLMMKTFVHVVEDPETFCLCMRWKH<br>DDNAERWRSFWDMPAVD*                                                                                                                                                                                                                                                                                                                                                                                                                                                                |
| >jgil106435le_g<br>w1.12.217.1 | MLKLCFCVVVG VAGDAFPVNIENETVGDMMKKIKHEEMYQFPASELQLFLAKVPKEKH<br>DMAWLSSRSEDVKKLKKGEKTP LIDILTEEDQELQAEDPLDDVLRGMDPPSLCQIHVLV<br>MAPPQDSLRSHTLTLSSVLLCHVLT KAPTPTDRNVDFKDDVCNFYGCYSPDESCVRC<br>MLLNDAFPSELV VASHLFRCSNEDVSDVMMQITLS DIDDERNGLLLFKPLKYAFDHFQI<br>SFIRDDTDVFR LKVFDP SILATPIVDLKD RKGKVLSTEQTQLLSRIENPCRNTQTTF<br>GDVDDSA LTFGLERPFYRCLNLQARVARVMAL EKKWIDASYDFQDFWSEVSLDDKM<br>EMFHRSILNS*                                                                                                                                                                                                                                                                                                                                                                                                                                                                                                                                  |
| >jgil106457le_g<br>w1.12.537.1 | MKLFCAMVGM AVGII EVIDIDNNAYVTALRDAIATKNEEIKKSALRLKLFLAKKGNLW<br>TDTEAAGVGGDLESLGFKLMKSVRL LKNPEYFGEDFQTGEGHVHVLVVVPEENMTVG<br>EPVVDVDGVNIYVTSNMTLNPDDL VAFWRAFQAIDTKIEADSVIALPEGTFILGNPKVGS<br>RIYIRPCYPQLWEVCWHIIHETPNL VILGNPGIGKTYFGYLLLLFLARLGKTVVYESRR<br>TKRRFLFSRNVVIKGSQQDFDDILEQDTTYVVDAMEPREFQARTILVTSPDRDVWYTF<br>NKISCQTRYMPVWTEQEIFSCREQVYSTIPKSVVQKCFYRWGGIPRYVLQYAQFDNHQ<br>ALIEKALEVVD FDLWLNAYGKLD DNN SQAHRLLHYRVNERFTCDYFGFASSFVQHEV<br>YQHLHKKEKRKLL EFIGRSVSGDLSVLRDRLAE EHDHHCARTHKKLRK*                                                                                                                                                                                                                                                                                                                                                                                                                           |
| >jgil106668le_g<br>w1.12.123.1 | MVKLFCAIVGVEGVSFVSVIGEGQTV EELKKA IKERNDDKINVS WLGLQLFLAKKAKG<br>DGDWLTEKDVQEGVYDMSDLQMLRAARAKLRLVKLS DNDVNEEQKVEGGKSVNVL<br>VVLPLGTTTTIKVNERENNAL TDELA YYQRIGQEIQSN CQQHC GPILDKIDS IYEKKPYPM<br>PFICVQSSGMGKSQ LAFALGGEGREHPRPWFY WTHGTVSDYDQRIYRNFASIGSAFDS<br>VVKQDEV RKEEEDDILNCTSVLYMTK KLVWYGFIIELLRYCSRSNVGAQMVRVENQTF<br>YVTKSNLEDVIEVRSRMEKNGEVLPFFILDEMPPSRTK KLSAFQLNVFRACGLV VIGMG<br>TDANISNLVGKPEHSRTDPH WMTVVS CFPPWQSIPFGDPAKEEVWQKVIELHPVVKH<br>IAEHSRGLFSRCFVDAVVKFAMEEVSENETFALADLLDAAFKAVYAELRITKGMFTEE<br>GRDAQLMALS YTIGSNKPPGTRPV TDS DSTSEPTPKRRKLDVDVGVASMR AHFANS G<br>YEGIADVDVLQGD LRFRTSDAWSPICQFP AIEKDVLLYLAVLGGK KFSYNDTSS TLD<br>VFEEFLERNGNREESNALRRDFTNFIFEN VVAHALFCASRRNGARGIALYEF LSGLVSE<br>FQDEYYQRDEFDASALLKEFDGLKEKFAEKKIPFLAPPNARWPDYILEAGGDCNFGHFE<br>RMDGYVMVPGVDG PLFACDCQYWKDDLDSDAMKKIIAGLNGGATGCGDDQ QKPKW<br>SNWSLALVFCRKL EEFESEQREDWEPSTGIATVDCKAWEVNWISKPEAGEKLVIVVQT<br>GRVLCPL* |
| >jgil106736le_g<br>w1.12.192.1 | MMKLFCAIVGVAGSAFSVEVNEDQTV EDLKTAIKNQNRMSVDANDLQLFLAKKKNGN<br>RVEWLTQLDVVKGVMDANGFTHLQFADAKLRAVGLK SSELVEVNEEDVAVGKGHVH<br>VLVKIDQTAPNVELMPFTSTCWLVTGSGVNALNTRGV RGQLYRLAHTELGYD PANV<br>RTDTGNIPRAFWHENNDIQIHVLFKKEEHALYFQSHL VDDFSIPIKSFVSKAPCPTDLQRI<br>FRDHVVADETVSPQLSMFSSEISVFDPSNPVFKYQRIEAERLFGSHGKAESAHLISASHCR<br>NVTSYDEYDKDDNNRLALSREM HGAYDGINCDFPLVNIEVVSASDHPELDHRFKVELQ<br>VSVYSHEYVFLGLR LKDGSTKTEDPLVMKTFVYVQDKNIFCTCIQWKYKNRQLREEF<br>FTTNPRAT*                                                                                                                                                                                                                                                                                                                                                                                                                                                                       |
| >jgil108643le_g<br>w1.15.666.1 | MAKLSLSCVIVGLMGS AFSVDIDADQFVGD LKKIIQKKKNDLHNVDADKLQLFLAKKD<br>KGWLPDKSEA ALELKKGEVHEDIQVLINGEEMEATKTLNYWLF EKNQMEEQLSSEQIH<br>VLVVPEIRDGKKRYRSSLWFAESEPLKRRVKTDESEDEDDDDVSEERTFFQLCGCPPM<br>AHPARKDSKLMERKAYTVIFAQLVEHV KDCFEFNRTSNNPGLSSNVVVTGNP GIGKSW                                                                                                                                                                                                                                                                                                                                                                                                                                                                                                                                                                                                                                                                               |

|                                |                                                                                                                                                                                                                                                                                                                                                                                                                                                                                                                                                                                                                                                 |
|--------------------------------|-------------------------------------------------------------------------------------------------------------------------------------------------------------------------------------------------------------------------------------------------------------------------------------------------------------------------------------------------------------------------------------------------------------------------------------------------------------------------------------------------------------------------------------------------------------------------------------------------------------------------------------------------|
|                                | FYLYCIFQLIRNREREDIKQLPPYELVMNYDDNFVKYDAARADEFVRLNKEDVDDLMDK<br>PFVLRRLVDARSTKLMGWRGVSVLFAVPDAEDLHDFEKVPGPKFIMPAWSLEELQDCNQ<br>VLPDDLKLADELVSRFDAFGGIPRYVFSKNKTAIENKLRAMASFSVKEILSYCKRGA<br>AVKESDQSDCVLQMPSEANFRLKFYLDLSSDICEKIVFQAEGEDLTMLAKFAMGK*                                                                                                                                                                                                                                                                                                                                                                                             |
| >jgil110274le_g<br>w1.18.174.1 | MVKFFCAIIGVAGSAFPVDIDASLSVGLKNAIKGKNDDIKCTARELQLFLAKKEKGAG<br>AWLTEDEAAAVSLDEGGHLQGFKMMKSSLYLKNPKHFGSNFQSDQVHVLVVVPD<br>QAQPQTGLWLVTASVENALNTKGIRCLYRLMASYLGYYPVRRRTGDKDTALWYED<br>KTLCIHSIFKSEENALLFDNVLQDECITQTSPLDGHVSTNVAPVSRQLSELRRISRYA<br>PQDTESPQVSMLSISTNTSIVDVMTDEFKYQRIESEWFGDVGKAQSCHLMSRDHCRKC<br>PSDRKYDNDPNNRLALSSAMHDWYDGRMYNVPVMNISVESVSERPVIGNRYKVNLI<br>RALNARYAKWISLILKEGFVASEDSLEMHTCVYVQNPKVFCVCMEWKRKEIDKQWKS<br>YYDMEPAVD*                                                                                                                                                                                              |
| >jgil112192le_g<br>w1.21.161.1 | MVKLFCAIVGAMESAISVEVGGLTVGDLKKAATDQKFDFAASKLQLFLTETEGGGW<br>LSEDDAAIAMRTGAIPEQVKLLKDEIDPAEEIGDKFGSAPTCKTIHVLVVVEGVTNV<br>TAATVFENNRKRREDDQPDFWMKAIEDDKVLTLPLTCEELKEHLQRELVPKIPLGGRL<br>SQIVESQNVAGKMNSKLFDTPEARHSVTDVTVAILNGVIAPVWIGGESPTATYHFLWNE<br>VIKVLMYVSDGTCSRNSSVFTSTGLFRPNLCFYNSANDKVCVFRGEEQARGEMTVPL<br>TDLRQLTWRYYDDAPYVFGYAAVAQDVCLVTIRESSETNAPGEKRRKVEIIRYNLRDL<br>RGRSLIFLALLNLSTLFRPVVGRIRPLGIAEYKTIIRPNGVKIAFGENCVVKTYPLTMPD<br>KIISDLRDLHWQMKENAVPNVVELKSTNMRKRSVELAPVGRQLPLENVHQLLMAMRD<br>ILRALVALHTIGLMHRDLRWENVLRYPDEDKWFLLDFDEGASSPAVKVDHLKAETHAP<br>EILSSSTHTTMVDIWSVGYLLETSHVHDLPALEDIKTQCLQENPSVRPTAQSLEAVEA<br>LIAN* |
| >jgil113302le_g<br>w1.24.271.1 | MVFASQDNDFNRCNPFPSQLPTAEETDEWLEFPSSLPLTRRRSLYIRPSFKSIAAQALLK<br>VDSNRRKYAVVTGTPGIGKSVFLYYVMWKLKDKRMLFVTRPPIYFDGESVLDYCYQ<br>LPYAGNRNFWSPDLWCLVDATNPCKIAGLPIHHCVLLASEPRDDYVRHFRKLVPTPQV<br>FYMPIWTEEMEKIPLYPASAASVWRDRFETLGGIPRLVLQAVQTDQPEFMRVCFYSLEN<br>CMRLVLFHSKTKTGFIDSLYTLEMPRHVHILSQEPYHEYTLAYASETAMRAVIDAKWIV<br>NRAEMLHFLVMNLKSTDLSLTQTTCHCIFELYAMQLELGGTFSYRSLQAGVEQSSETLD<br>EDENDIDIPMSWREIVDRVEADQNEQDLYVPKSAKDVAIDAWMPEVGGFQIALGKEQK<br>IKSQADELALLGQGGNRLFFLVFPRDFDSFTKQEPLSIEQYALLIPYPEV*                                                                                                                                        |
| >jgil114043le_g<br>w1.25.260.1 | MVMVKIFCKIVGEAGSIFSVKIDDESVEDFMRKIKDRCDGKIVAPWMDLQLFLAKKKD<br>GVWLTKRDLVLEVTSELPLDDTLAPLNSVGLSEEDVRYRMTKEDIKAKKVPVHVLLV<br>PTEDYLRSPATILLETILPHVLTHTTTLTEDNRDFRHNLCNFYGCYTREQSLVRCMLLD<br>VPLPKSLVLASHLFRRSNEYLSFRMMQISDIDDVKNGLLLFKPLKYAFDHFQISFIRDDT<br>DVFRLKLFSTIKETPLIDLVDHGGKVLSEEQTGELLSDVNNDTCLFDVGGKTFGDVDG<br>CALAFTGIERPYHCLNLQARVALMVALKKGWIDESYDFKDFWSEVSLDDKMEMFHR<br>SILNSVADI*                                                                                                                                                                                                                                                  |
| >jgil117630le_g<br>w1.33.284.1 | MIKLFCAIVGEERNVIEVDISDVESISALKEAIKTKMPITLKYVDANTLQLFPAKMPDDK<br>WLRDDSAADDLMSGRIHDDIKAMIADSKILRPACRIRDELSAKKTGWKWSLPWSPITP<br>KIKTKQIHVLVKVPDMMTGTLPLCGVAPEAQWRLWQSIVRVTSYGTYSGTALVHRSSR<br>NL YLLTNLHFWLAEEEEIEFFEHMSAGFKMVELYLKRNPRKRSRSGKQKSDGGELQQ<br>TFNGSPVVVDQLLPGHTTLEVHSFVFKSDACWCSSVDYDYAVFKVLAPPPRIQLLGV<br>EPSVSHFPTNVYVFGFHDGHEEKKFGHSY AIVPARIKYHRYKCLILSLSTVSLPESGVICT<br>SRGLSIGYLAGSTIDESGNEVNQWLELGGFFRIL*                                                                                                                                                                                                                    |
| >jgil128631le_g<br>w1.77.29.1  | MVKLFCAIVGDPSWSFEVDIDENVSSELNKAIKTKNKIKLKCVDANDLQLFLAKTDGP<br>SGGKVLDRAGAAAVETDDLHRFTRMDSTLYVRNPKHFGSGFKPDEGQVHVLVVVP<br>KWAVEAETIGQNVVERVGLPRTTALNDPKKYAEEIALDDWGVNTVHQIPSIWEFMSLS<br>GCTKTGELFWRLEEKQVASLLLDGWFRESSPGSINQFEDMKSIMLGGSPGIGKSTLLCVM<br>AFHLVLKYKKNVLVYRQLKGENCLLYLGYEDDEVVYFTVKRCKADRAVSIYEELGYR<br>QGFPNVWLLLDGFRYKEIPEGLETFRMLATSQQVSLKSQESTDAYCCLLPCWSKKDLLS<br>MGLIYNFTPDMEERFFYSGGSVREFTYATWEDIQRAMDVAVSGVEDYSKLLTTASC<br>MFTDTSQVVRTFVENTNDRSHYFSSRYWEPMDSEYAVLALSRLKADALHRIYTW<br>KMAGHGLAGCAFEIYLHRLAIDNRLEL                                                                                                            |
| >jgil129711le_g                | MMKLFCAVVGEAESVFHVDIEPGETVSDLKDAIKEINKHDPVLKNVTAMNLQLFLAKK                                                                                                                                                                                                                                                                                                                                                                                                                                                                                                                                                                                      |

|                                                                              |                                                                                                                                                                                                                                                                                                                                                                                                                                                                                                                                                                                                                                                                                                                                                                 |
|------------------------------------------------------------------------------|-----------------------------------------------------------------------------------------------------------------------------------------------------------------------------------------------------------------------------------------------------------------------------------------------------------------------------------------------------------------------------------------------------------------------------------------------------------------------------------------------------------------------------------------------------------------------------------------------------------------------------------------------------------------------------------------------------------------------------------------------------------------|
| w1.86.23.1                                                                   | GGAWLSGDDPAVLELEEIEHPDILEMMDAKPMLDDKTLQFLLEFKNKLPQPSTNQIHV<br>LVEIPAGARAIPYSNRPPKPFVSSSEGATWDFQNPDLNEQLSNAIRKHYDAWKRGYYDKI<br>LHPLFTCWSGPGTGKSRLLEDFPKLLKDWLWLFAGKSENPD MIRLLQNAFTFNIAFDKETP<br>HEAGSFSSAAELIGTRMLYQLQDTLKWDPFVQEKSRHSVPSDVMKLSKILGTRHKDM<br>CVILCVDGMEKLSHENGKDCFEFYKVLTVLSYLIGTSKCWVIAICSATIYSPVKNFLLSS<br>PQWAYEVPTAILS RPTVEGEDIFATFNQDQLIELLIDDMGGFGRALVHVM MRKARRK<br>GSLEFMSVLTAVLAELRVLYPRIKKMASMQEAFLAVVARRPVDKYSRFGKLSLDDVI<br>STGLVRREGRFLTCPYVLYLLDTPDPSWSKYKCYSSQETRENAPWQTW EAFNYKLR<br>ALKSVACQGVKVDWRDIHRGARFGRGCYRVVIEEPRTYSLDVNRKTAKLDGFGEGNIFR<br>CKYDPDQQGYFFEDAFTGVKDAESRAFHEIHQCKKIKDNL SLEDLLEEKKAAGPHDL<br>FLLYCTSEVEGDIESLENCAVVDRTCEWKYYPFAARALYVSTVSPPDINTSAIQLQLV<br>NGIGPAISKRIVEKRPYSSLEEAHEKTGVSMNILSQTSCRSKVDK* |
| >jgil131973le_g<br>w1.125.9.1                                                | MKLFYVIVGVAGSPFPVDIEPSETVGDLTKA IKKENKCRFKHVDAYDLQLYLAKKDKG<br>NGAWLTEDDVATVRDDAVFQTYKLMKPTLFLN NTEICGESINQCDVHVLVKAPMRLPT<br>IHQLHYRHFTVGSVDIRTKKSMFTDPPPLVRFWRALQDRTEFKADAVLTLPEGTFLLG<br>NPMLGSRIYIRHCYPRLWQVCLKMINDEAMNTPHLVILGNP GIGKTYFGYVILWLLRS<br>GNTVVYESRVCHRRFLFSQDMVVVQSGSKKDFIEILEQTTTYVVDGV EPRYYSAKTILLT<br>SPQREVWYEFNKDDCRSCYMPVWSRDEVLTCRELMYSDIPESVQDCFRRWGGIPRYV<br>LHYATAGGRQWLEKAMENITLDSLMDACGDL YENPSEESLHLLHYRVTKEFNTDYF<br>DFASQYVLEEVYRRLYNHNKKKLEFIDKSGVWGAAAVLRDHLFEVYTV AASLTDED<br>GDGVAVEQFKANKL*                                                                                                                                                                                                                              |
| >jgil20879lfgene<br>sh1_pg.PHYCA<br>scaffold_75_#_8                          | MVKLFCAVVG VQGSAFPVDIDASQSVGDLKDAIKTKNKIKLKNIDASDLQLFLAKPKD<br>GPWLRSDSDVIRMRS GAIPEQVKLLNEQIDPAAGIGALFGDAKPTMEIHVLRVPDY<br>DSDSEVNQQRKLT SFQKLRKESGATGELPVQGD FMKLFDLTDDDIGKVLDIKAIGDIVG<br>FTGSEFYIRKEILTS DQWGSARLLVAMIAQDNPNWKNIMGELGVINCTQLSLNNDTKV<br>STTV DASQFIARNNQLQVLPDSD*                                                                                                                                                                                                                                                                                                                                                                                                                                                                           |
| >jgil39322lgw1.<br>83.18.1                                                   | MVELSLQCAIVGQIGRSFDVEIDDGKKVSKL KEMIQVKNRETIKCDAKDLRFLAKMGP<br>PTTTQLLKIWKKEST DGNSPFSPIPEFGEMVKLFYLN NMFIEEQMELPSTDQIHVLVVV<br>PPPDV GSKRSADIEVAKVLKRLKMI EPKVLTEFIPLVPEKEFQLDNL SMVQQSDDPVM<br>TPTLHEFWKKFGEFPLYFVRMEEVFWKVIKLLFGEDRVVIVGSPGVGKSCFLMLL<br>AFYLACIKRKKVLVIRRLK                                                                                                                                                                                                                                                                                                                                                                                                                                                                                 |
| >jgil506739lfgen<br>esh2_kg.PHYC<br>Ascaffold_21_#<br>_111_#_Contig6<br>65.1 | MVLVALTCALVGKTGVLGVKIDDSAQVWELKKAITVEKSN DLKDVDADKLELFLAKM<br>EGGTWLDGAGAAAV ALDERGHPQGC VQMDPTLWIKNSKHFGDNFKPGEQVHVLVV<br>VPKDENDRSAAMALGVPSLPPTTFHRH PERLKRWAANEMIRQKNQD GNEKTGTRDTN<br>KKRKNRDIDKSM PYSSLSWNDLEPILSVE DFLKASAVPPNVVEALRDRLMQVRKLYG<br>DVYSGKEAKRQVFIVAIIEAVCLMLGDATILVEEEVKGNV LVHGRFEFVLRGKNRVS<br>IVEAKRDDIPQGIAQNVAGLEALSDVEGLERTLGIVTNYLEWVFISDDDEKIRRMNTTLK<br>VYGAVPSIQELTEIVGMIYGFLANSS*                                                                                                                                                                                                                                                                                                                                              |
| >jgil511381lfgen<br>esh2_kg.PHYC<br>Ascaffold_83_#<br>_9_#_Contig727<br>.1   | MVKLSLQCAVVDQAGSSFDVEIDDSAKVSKLKKVIKEENPATITCDAKDLQLFLAKKD<br>DAWLDGAGAAAVELDEHGHPQGC VQMDPTLWVKNPKHFGDNFQPGEGQVHVLVVV<br>PEGVVGSASETSKMD FVVVDKVS KLYEHSVLSKRTRYVHSEMSSSKGNKLVKELKIRVT<br>PVDVAPFTGGSPTPVEEF EWIKGRTEEQQSGRYRDYVEANIGDVL RNNKLCVFSVEKGA<br>NILSVEVPGCDVDLAGRTDMIVLSAIVQKFPHYLPHLPGVKMLIEVKREVKSA SEFQALS<br>ELIAMDFIVDESVMALLTNLTNHWEFLWVSNKSNRPIAATTTLTPGEAFEVIR TLLAQ<br>SSTADADIMLPCLAEPVKRRKLNQMLPFIGEASGDGIRESIERYYDIASCLGPDFDMARA<br>VARQVTRSIPTLSYFS*                                                                                                                                                                                                                                                                                   |
| >jgil527369lestE<br>xt2_fgenesh1_p<br>m.C_PHYCAsca<br>ffold_180095           | MELRCGVYGE GSVFSVKIARDVKVSALQKKIASVLSTEQHTVFPRLLALYLARKKEGEE<br>VKWLKDDRHA KDFLRGGTITEYEEMRPSWTLDD EELFGPDFQPGQEEIHVLVELPKAA<br>VESASLVKMEKQLDEMYERIAENKRKRYVHSEMSLIKGRALLQDLKMRLTVVDTVPFT<br>TTDASPVQVP AFEWESICDGRGQNIALTEEQQRVRYREYVENNIGDVLTTKKLCV LGVE<br>KGM DILSVAVPGHDIDL AGRSDILM VIEVKRVLKSGCTFQALSELIALDFL VDDPVMAL<br>LTNLTDHWQFFWVSDK KKKKHTLLAQSSSADAEINLPCIEEPVKRRKLAEVLPSVSEGG<br>ESNGVREAIERYDYDIASVLGPDIE MARAVANQVTRSIPIYSSYPS*                                                                                                                                                                                                                                                                                                              |
| >jgil540976lestE<br>xt2_Genewise1P                                           | MTIYCAVVG ENESAFGIDIDEGKSV DQLKQAIKERNEDIHVPSHRLKLF LAKKSGVWLT<br>EIDVMEDVSDTTDLELLEAGRATLRSVGLSDEDEVGEVDEADAAAGEGPVNVLVVPIPEL                                                                                                                                                                                                                                                                                                                                                                                                                                                                                                                                                                                                                                  |

|                                                                  |                                                                                                                                                                                                                                                                                                                                                                                                                                                                                                                                                                                                                                                                                                               |
|------------------------------------------------------------------|---------------------------------------------------------------------------------------------------------------------------------------------------------------------------------------------------------------------------------------------------------------------------------------------------------------------------------------------------------------------------------------------------------------------------------------------------------------------------------------------------------------------------------------------------------------------------------------------------------------------------------------------------------------------------------------------------------------|
| lus.C_PHYCAscaffold_50927                                        | YNVPSVMALFNVMLPHVLTQVPTTESDVVIEFKMELCKFYECYSRHRTWVRCMLLD<br>VAFPKSLVSASHLFRCCNAFMAPLTVQLWDIDDMRNGLLLFKPLKHAFDHFQLSFILDD<br>TNVFRLLKFDPSIYNTRLLDLKDCDNENVLSMEEMGVLFYNTSLTRNPCEFDQTTFGD<br>VDGSALVFTGLKRPFYRCLNQARLARVFALKKHWIDESYNFTDFWSEVSLDDKMDM<br>FHRSILEN*                                                                                                                                                                                                                                                                                                                                                                                                                                                |
| >jgil556686lestE<br>xt2_Genewise1P<br>lus.C_PHYCAscaffold_940014 | MVLVALTCALVGKTGVLGVKIDDSAQVWELKKAIKEKSLNKLKNADADELELSLAKK<br>GAGWLSIEDLAAIQKGEDVPGFERVSLVDTEDEAYSASIRDVLKTNMGPPPQTRQIHVL<br>VVVPKDENDRSAMALDVPSLPPTTIHRHPERLKRWAANEMIRQKNQEGNEKTSTRDT<br>NKKRKNRDIDSSMPYLSLSWTDLEPILTMEDFNLEASAVPQNVVEELRDRMLQVRKLY<br>GDVYSGKEAKRQVFIMPIFEAVCLMLGDATILVEEDVKGKNVHVHGRFEFVLKHGKKR<br>VSIVIAKRDDIPQGIAQNAGLEALSDVEGLERTLGIVTNYLEWVFISDDDEKIRRMNTT<br>LKVYGAVPSTKELREIVGMICGLLANST*                                                                                                                                                                                                                                                                                             |
| >jgil558527lestE<br>xt2_Genewise1.<br>C_PHYCAscaffold_11463      | MMKLYCAIVGVAGSVFAVEIGEDKTVYDLKDAIKTQNKIKKVDAGDLQLFLAKKKKK<br>GKGMWLTEKDVQKGVNNTSDFNLLGTVGAPLKFVGLLKDDVEFEPTLKDVESMNTPV<br>HVLVAIPQQWTISKKTD AKRLEKEENIPLEMLWQYSEMEITTFQPDELSSLLQRPLPFQ<br>LNLQKFLTPKTI FDPSPGFLVCNELSALIDGFSYSCDYRDPMASENTWQRMVDQLL DIS<br>YRLCRAHGFDVVSNRN                                                                                                                                                                                                                                                                                                                                                                                                                                   |
| >jgil559084lestE<br>xt2_Genewise1.<br>C_PHYCAscaffold_21063      | MIWLYCAIVGKAGGVFKINKGDQVWELKKKIKDENQATITCDANELQLFLAKKDG<br>MWLPEDELVAVDLENGTIHPDIDKMMNAEQMQDNKTLQFWLFEENEMPKPSTDQIH<br>VLVVVPKQDGLTNETSVAQTPLQDEEASAYSFSELNSAMRDQIVRKMRLENVDPVKE<br>PEDTSIGGYSWIPKIEENESQRAGYMAYLQQHLKTLIDRGDFLLDDIADDKSVLDIVDP<br>RLPFAMSGTADVLLINRTSKNPLIKLAGVSLVIELKKKVEPDHVPQAIGQLVSCSMKAPL<br>NCYPLSLLTDLNDRWHFSWFSNHTLTQVTLKYPKNAFRLIEAAVLRRTESVSLPSPFIP<br>GPFKIKVDDFLLQPDDGYAEEMMERYELMADVVEPEFLMARRAEYAQHLVQSMPMY<br>AHTFK*                                                                                                                                                                                                                                                          |
| >jgil563460lestE<br>xt2_Genewise1.<br>C_PHYCAscaffold_120265     | MMKLFCAIVGARSAFSVEVGEDQTVEDLKLAIKNQNRNKLMSVDANDLQLFLAKKDK<br>GNGMEWLTQLDVVKGVMDANGFAHLLFVDAKLRAVGLDSELGKVNKDVAVGKG<br>HVHVLVVVPKTVGSKDGRSIQKFSAPIEFSEMEHEGGVPSTFRTERKDTVAIASLLDR<br>IPVVFFRAPPLSGKTAMCHLLYNHIVFSKPDALVASVRANRMARNETFAEYFKKMYGC<br>DFEEFCAYRCDRVLLIDEAQITYNDEQLWRGFVKDTLESQIPGLRLVLFSSYGSFVYRK<br>QERPGTPILVPTDNTFGLNVTSPKPLQLSRVELEEMVLNSIGASVSDLIWVLCSGHIGIA<br>RAVLVFLRWKFGSTTPNAEDVEMELRSEELLQYVRASYRGIPTADAFQIRVKNNDLSEE<br>TILKMSEVLNGVASGKVTSLHDPDGGQTPRSQTAVELLTKFGFLYEDQAKQLQFASNM<br>HLKIWLLSSRTDPIGYMVKDISHGDFIVACVQRMSASRLQKFATENTTRVARERQIQME<br>LYGATTSCLPKGVLTPEWRTDDGKGFIDL VIRGSGILWFWELLVNGDDAVCHSKRFE<br>TGGTNYGSLTRNCRYMLIDFRQNMGVKRKRDGFLYVSFADSFTKAHVFLDKPTVSVSE<br>LLS* |
| >jgil567378lestE<br>xt2_Genewise1.<br>C_PHYCAscaffold_240430     | MVNLFCIIVGVAGNAFEVKIDDGASVAALKKEIKQENNIKLGVDAGDLQLFLAKKDG<br>AWLMSKDLLRMWNEETPEEDERDYMSERLDDPTVRIKEKFPSEYPDRSIHVLVQVPRE<br>LLYNQPKPRDSSNEWLAEFFNHKVEPRSLPFVGLKSSFVTQPLPAKIRVKQEWLNEWAL<br>SPGLQEKMFVLDLDDAPCMEFTSLIFNKRTLNPFRGKTENAFISMWDSIFRNVLDVLF<br>QAHIDRDSCNGSSTRQKRPDLFVLDQVCVFRGEEKPPDVNISVPTTEELCSKLWAYGS<br>VPYVFGYAASGYDIQLHALCPLDPLNVGGVVTKNIGTFNLEVKEHLFQIVLVMNLSSL<br>FQAIADCEPASGRDEFDRITRSSGWPSKPLQTMISGKNFSTNVGDKRTTTLKRASVNV<br>DRLTNLHFQKRLAVFKPRGTMVRPSNLLDLFGALKDVLQALVALHRLGWHRDIRWSN<br>VIRQRTGNSWFLIDFVDAATNPQQYPSGQHLVVEEHAPEIFVENGVHTTAVDIWA VGF<br>IETSGVEWLDFAGR TSLYRRLIAKDPAARPNAAEEVLAELKALEEAAKSEKEACENSRRS<br>ETQCRKRKLPDS*                                                  |
| >jgil570403lestE<br>xt2_Genewise1.<br>C_PHYCAscaffold_370147     | MEVVKLFCVIVGEAGSAFSVKGQDQEVDDLKEAIKDRSDGKIDVPRPDLQLFLAKNG<br>NAWLSSDNDVVKALKEGVKTTLIDELTQKEKELQGESGLKQVLAGMLTPSTDQIHVLV<br>VIPDQSKSAPSVSFEGLDRCRDSFFLQLPTAGEDDSWLMFPQPLPLTERQKLYIRSSYK<br>SIAAQALSKMDPKRRKYAVVTGTPGVGKSVFLFYVMWKLIEKKRVLLMAEPAIYFD<br>GESMWEIQQLPYSGNRTFWSVDLWCLVDSVDPTTIAGFPIRKCCVLLASTPRRDCIGEF<br>NKLEPTPDVFYMPLWTKEELSTIAPLYPNAQDQWENRFEGGGVPRLVLDLKVTPQE<br>LLQTACSNCLDGDQFEDQNGSDSDSHPQP*                                                                                                                                                                                                                                                                                               |

|                                                                  |                                                                                                                                                                                                                                                                                                                                                                                                                                                                                                                                                                                                                                  |
|------------------------------------------------------------------|----------------------------------------------------------------------------------------------------------------------------------------------------------------------------------------------------------------------------------------------------------------------------------------------------------------------------------------------------------------------------------------------------------------------------------------------------------------------------------------------------------------------------------------------------------------------------------------------------------------------------------|
| >jgil573037lestE<br>xt2_Genewise1.<br>C_PHYCAscaff<br>old_510047 | MVTLFCAIVGIESDAFAVEVNENDSVYALKQAIHARKMYEFSADKLLLFPKTEGPAW<br>LSNSEDVVKLEEGEKTPLIEALTTKQCQLQAEPLVSDMLKEIDPPSLSQIHVLVVLPLDK<br>KRKRGGTTRLSDLLETCSKEGSLPTEGDFLQMFWDQDCGKVKDITAIGDIVGFTGFR<br>FFVRKEILCVLENLKHFKANFDRGEVGDQFIFLGSFGTGSVCLALLCFYVAATSHPV<br>LWYRSVQYGREMSFTCLFYQKKYRWRNGAEVKIYDRLYDEV                                                                                                                                                                                                                                                                                                                                 |
| >jgil573801lestE<br>xt2_Genewise1.<br>C_PHYCAscaff<br>old_550284 | MIKLFCALVGAQGSAFPVDIDASQSIGDLKDAIKDQKQNDLKNVDADKLQLFLAKKGD<br>GWLASKDLPSIQRDMASPTIFEKLPLVDPTCSIQEVLTENELPDPQTRQIHVLVNVVPQVH<br>VLGKRTRADEWFQIGMKSRVIVDGNETDRITRYFEMAGFPPLAHPKAEYRKILERN<br>AYIVIFTELMKKAKLSFEKGADCSLVVTGNPGIGKSRFYLYCIFTLFFALTWKLRSPPSI                                                                                                                                                                                                                                                                                                                                                                          |
| >jgil96357le_gw<br>1.1.1010.1                                    | MIKLFCVFGAAGSAFPVDIDASQFVGDLYAIVEKKKEDPNLKSVTAKNLQLFQTKTE<br>NGDGWLSDDGAVIAMRTGAIPEQVKLLKDEMDPAEQIGDKFRNAPTCKTIHVLVVV<br>PPAPENERKRKRMEDEVAPDAWIKAIKDEPVTTLPTCEGLKHLLRALHVKIPINRFL<br>QIVSAQNSTGELFTVLEKLFEPQPRNVSDITGAVLRPIIDPLPSGPTTKSSYHHFWDCVI<br>ATLLKVVTGNYHRSTNASASTGAYRPMCFYSRKSNICVFRGEEKANGELDVPMAEL<br>HEKLTWRYDDAPYIFGYAAVGLLVCLVTIQKDEKTSRAKAEKIETYDLGNLKDRLFL<br>LALLNLSTLFDPVVDLIRPLGIPEYITRERTNGVRIEFAEDCVIKTYPKNMPSDGIIRNLKS<br>LHRLMKEHSVPNVVELKNANKKKHVKLAPIGIDRRPVNVQQLMALCDILKALVAL<br>HAINVMHRDLRWENVLKYSTEGDKWFLIDFDEGRLSAATVTHLKAESHAPEILSSSH<br>TVKVDIWSVGYLLKTCCLQDLPPELKRISQCLQTDPSRPTAKSLLAGIESLIES* |
| >jgil100678le_g<br>w1.5.1392.1                                   | MVKDIKLRGAYGEGSVFSVKIKQADVEALQLAIVNARKGVNRFNVDPSTLTLYLA<br>GKQEGEEIKWLKDEDSLDELRGVYPKQYMKMRSSRILDEDYFGENFQGRHDVHVL<br>VELPEKVSSVQSVVRAVFWLVTGLVENALQTRGVHRLIYRIADAQLGYDPANMLPDN<br>KPRAFWYTNNDLQFHVLFKEGECVHCTCWC*                                                                                                                                                                                                                                                                                                                                                                                                               |
| >jgil102004le_g<br>w1.6.669.1                                    | CVIGVAGNAFVSNIDENLSVGHLLKAIKGENVNDPTLKNVAAKNLQLFLAKAEGGARL<br>SSLTDEASEDATKVKKGEWLSNLTDDVKLKKGEKTPLESVTHENKGLQGESGFKRV<br>LGPFLAKRKEWIWL*                                                                                                                                                                                                                                                                                                                                                                                                                                                                                        |
| >jgil106201le_g<br>w1.12.351.1                                   | IKLSLQCAIVGQTGSSFDVEIDDGEKVSCLKEMITEKNKQDPNLKNVAAKNLQLFLAKK<br>GDAWLPDDDPAAQDLEEGKIHTKALIDGNMKKEAWTIEDVLVDNNMTGEGRAPKS<br>RQIHVLA VVPGILTTIERERVDENQD*                                                                                                                                                                                                                                                                                                                                                                                                                                                                           |
| >jgil108281le_g<br>w1.15.479.1                                   | MKKVSLQCVIVGIGSSFDVEIDDGEKVSCLKMRAIKDRKPLTITCEADLLQLFLAKKGN<br>WLSSTDDVKALKKGEKTFIDELMHEKEKMEEEYPLSDYLANMNDPEVKQIHVLVV<br>VP                                                                                                                                                                                                                                                                                                                                                                                                                                                                                                     |
| >jgil108895le_g<br>w1.16.149.1                                   | MAKLSLQCAIVGQIGSSFDVEIDDGEKVSCLKDAIKTKNKDDPILKTVAKNLQLFLAK<br>QGNAWLPDDDPAAQDLNEGKVHTEIQALIPDEHRAALKLVNGESDDYINALTAGEQIL<br>ASKTIETWLYEKIKMEEPSTAQTHVLVVVP                                                                                                                                                                                                                                                                                                                                                                                                                                                                       |
| >jgil109378le_g<br>w1.16.566.1                                   | MKLTLQCAIVGQTGSSFDVKIEEGQTVGDLKEAIAVDQKFGFAASKLQLFLAKQPVEDD<br>DGKEVVPVYHPCAEGMKKESFKWLPDKHRAALKLVKGESDDYINSLTAGEPILASKTL<br>TIWLYEKNMEDPSTQQFHVLVVPE                                                                                                                                                                                                                                                                                                                                                                                                                                                                            |
| >jgil113678le_g<br>w1.24.344.1                                   | MNRLERYAALNEIVQEKNAENGKTSNQDTNHRKCKKALDNSVPFSSLSWDEIEPVLQ<br>LNMFLHTAKPVPDEFVRKILAQLADLHQLYGDVSTGKEEKRMFTMTVLEAVCLHLG<br>DVMIFVDEELTGTKIHMHSIEFVLQRGAKRVPIVIARRDNVEQGMACVACVEVLAD<br>AEGLETFGIVTNYLHWIFIRDEDESIELIDQPLNASMPSFESLKVILGMICGMLESE*                                                                                                                                                                                                                                                                                                                                                                                  |
| >jgil114206le_g<br>w1.25.261.1                                   | PLDDTLAPLNSVGLSEEDVRYRMTKEDIKAKKVPVHVLVVPPADSPATILLETILPHVL<br>THATTTFTEDNRDFTHNLCNFYGCYTRQSLVRCMLLDVPLPKSLVLASHLFRSNEYL<br>SFRMMQISDIDEVKNGLLLFKPLKYAFDFHFQISFIRDDTDVFRLLKFDSTIKDTPLIDLS<br>RYGKKVLSEEQTGELVSVADNGSCLFDVGTFGDVGDCALAFGTIERPYYRCLNLQAR<br>VALMVALKKGWIDESYDFKDFWSEVSLDDKMEMFHRSILNSVAEF*                                                                                                                                                                                                                                                                                                                         |
| >jgil117855le_g<br>w1.34.341.1                                   | MVTIFCVVAGPGSVFAVDIGITQTIDHLKQIKENKPNMIRFDADLLKLYLARDGGAWL<br>NSNDDDFKALKRREVPARIKNLMQEQLLDETAKLNDDDYFGKHFPGDRDIHVLEVEL<br>PEDPTEVLHYKSELVCGDCFLAELLVVTNSFRL*                                                                                                                                                                                                                                                                                                                                                                                                                                                                    |
| >jgil120859le_g<br>w1.42.251.1                                   | MVTVFCIVGVPGSVFSVKIDENESVAELKKAIKKETPNIFQCNAMEDLQLYLTKKGNV<br>WLTEAHVKEGLRDTSLGLKLLNSMKTCLKFLGRDENDEEGEEEGMGLVDVLV                                                                                                                                                                                                                                                                                                                                                                                                                                                                                                               |
| >jgil12221le_g<br>w1.47.236.1                                    | MVTVFCIVGVPGSVFSVKIDENESVAELKKAIKKPNIFQCNAMEDCLSDGEGRRVAD<br>GGSCERLERHQWVEAVGFNEGETKSSGVEERKRRRR*                                                                                                                                                                                                                                                                                                                                                                                                                                                                                                                               |
| >jgil124124le_g                                                  | MGEELYDPTDKISAKFPSQIPGGTIHVLLVPEGGKRHLSNEWFTESFHPLKRRVGED                                                                                                                                                                                                                                                                                                                                                                                                                                                                                                                                                                        |



|                                                          |                                                                                                                                                                                                                                                                                                                                                                                                                |
|----------------------------------------------------------|----------------------------------------------------------------------------------------------------------------------------------------------------------------------------------------------------------------------------------------------------------------------------------------------------------------------------------------------------------------------------------------------------------------|
| w1.52.167.1                                              | VNKEKRFFDMRDFPSLLEHPKVEFKTIVEREVYVVVIFSQLVQYAKTCFEFVPTSASEPDG<br>KSKPGKDSNIVVTGNPGIGKSRFFLYCIFQLILREREDVALLPPYELVNNHKTNYVKYDA<br>VSKEFVELNKKDVRALQRKPYVIRLVEATSSSELTGWRGVSVLFASPGVDGIDNFSKVDG<br>LTFIMPTWTFEELEDYNSLLSDELKLAEDELLSRYDRFGGIPRFVFSQIMDQTEAKIQSAI<br>ASFSALDVISYCRKNDVREKDYSHCVLEMVPTKADFRANFYLDVFSMHIAEAVIDKV<br>HGDSLAKVSEFAV                                                                   |
| >jgil125925le_g<br>w1.60.118.1                           | MTELKLFICALVDTQAVFYVTINGEKTVYDLKKAINEKPNLEKVDTAMLQLYLAKK<br>CDGLWLTENDVKNVGSSTAGLTLNAAQAPLQDAILGEGLEHPSKEDKVAGNGPVHV<br>LVSVPESVG                                                                                                                                                                                                                                                                              |
| >jgil127207le_g<br>w1.67.186.1                           | MMKLFCSSVGVAGSAFPVDIASDETVDGLKEAIKAKKMYCFPADELRLFLVNTSVKNP<br>DEEEKKAH*                                                                                                                                                                                                                                                                                                                                        |
| >jgil127255le_g<br>w1.67.176.1                           | EDEDSSIDPYPWESDLAEDHEGQRKGYMQYLKDNLHGVLSEGGSTTIPPGTSTSGQPKY<br>HLKDTSRMTSLLTCKASSLPFGLKGTADLMIIGEV AHSRNDIFADLQFVIKIKKNQC<br>GPK ERKELLELVAANWKSYSPCAPIGLLSNLNDYWFYFMWFTTDRKIARMKLSCPANGLKA<br>M*                                                                                                                                                                                                              |
| >jgil127347le_g<br>w1.68.101.1                           | MLNLLCAIVGAQGSVFPVLIGESVGDLLKAIKMKPLTVTCKADRLQLFLTKEGGG<br>WLSSKDEVVLATKGGIPEEINKMLIDEIDPAKEIADVLGAAPTVMVIHVLVVVPRGLY<br>TIHGDHVTARTDGWQSFSPTKLRLTRCRLLEV*                                                                                                                                                                                                                                                     |
| >jgil12764lfgene<br>sh1_pg.PHYCA<br>scaffold_1_#_21<br>6 | MLLNCAIIGGGDVISIIIEWKTVALLKDAIKEKPKIKLNDVDAGDLHLFLAKKDGAWL<br>MSDDLQMRREDGKGERGYMSEELKDPVAKISAKFPSELPGSIHVLVVQRFRIEDVIDIL<br>AELEKIDDVKNMTVILCVDALQQLVNDDAKTRNGQFRRSYHACSDDMAAI*                                                                                                                                                                                                                               |
| >jgil128012le_g<br>w1.73.136.1                           | MKVSQYVVVGVAGSAFPIDIGKNLLVGHLEAIKEKHDDIKCPARDLQLFLAKAGGN<br>AWLANSTDHVKKLKKGEKTAYIEALIHENKELPRKDPISKYLERMDEPQMEQIHVLVV<br>VP                                                                                                                                                                                                                                                                                   |
| >jgil128338le_g<br>w1.75.57.1                            | MVKLSLQCAIVGQIGSSFDVEIDNGEKVSKLKEMIQVKNRETICDAKDLRLFLAKKGD<br>AWLPDDDPAAQDLEEGKVHTAIQALIDGNKMKKEAWTIADV*                                                                                                                                                                                                                                                                                                       |
| >jgil128353le_g<br>w1.75.129.1                           | MVKLFCAVVGQGSAFPVDIDASLSVGDLDKAIKTKNKIKLKNIDASDLQLFLAKPKDG<br>PWLRSDDSDVIRMRSGAIPQVKKLLNEQIDPAAGIGALFGDAKPTMEIHVLVRVPDYD<br>SDSEVNQQRKLTQKLRKESGATGELPVQGDVFMKLFDLTDDDIGKVLNIKAIGDIVGF<br>TGSDFYTFARP*                                                                                                                                                                                                         |
| >jgil128403le_g<br>w1.75.131.1                           | GSAFPVDIDVLSVGDLLKAINVEKTIKLKNVDAADLQLFMTTKTKDGQWLRSDASDVI<br>NMRSGVIPEQVKKLMNKWTRQMKLANCLVKNHQRRQFTCWWRLQRLI*                                                                                                                                                                                                                                                                                                 |
| >jgil129581le_g<br>w1.85.127.1                           | MVSITLCCVIVGVVGESEFDVNIAGKSVHQLKEVIKAKNKKLENVDTRELQLFLAKTA<br>DGTWLSLTDHAVNSLRNGIIPTKVKALLKRE                                                                                                                                                                                                                                                                                                                  |
| >jgil129660le_g<br>w1.86.101.1                           | LWNDEVIVAARIPREKVLMMHERISRGGFGEVYVGVYNGRKAIAIKMLLPEIRKRIQSVNE<br>FLVEVKLMAALEHPRIVEFIGVAWDSLTDLCVVSELMERGDRLALLSQFAENHPHGF<br>DHDVKVIALHVAHALTYMHSFSPPIVHRDLKSKNILLTNEFDAKLTDGASRERVDRTM<br>TAGVGTSLWMAPEIMAGEKYDEKADMFSFAVVLSELDLHVLPYTKLRQETRASDVAIL<br>QLVLQGKTQIDFSDACPSSIAALGMACA AKDPTARPTAAQALYELQQTLSNEFY*                                                                                             |
| >jgil129685le_g<br>w1.86.155.1                           | MVKLFCAIAGIAGSVFLVEIEEALEVDLKNAIQKEKPLTITCAHQQLFLAKKDDGK<br>GAWLTEVEVKNVNDTTGLKPLDAVRAKLKNVQLSDSDVGGVDEADEVAGKGPVNV<br>LVML                                                                                                                                                                                                                                                                                    |
| >jgil131615le_g<br>w1.108.42.1                           | MKVSQCAIVGQTGSSFDVEIDDSEKVSLLKKAIEKQEKISFKDVAVDLHLFLAKVQK<br>DMTWLYSRSEDVKKLKKGEKTPLIEALTMERHELQGEDPLENVLNGIDPPSVRQIHVLV<br>VVPKG                                                                                                                                                                                                                                                                              |
| >jgil131976le_g<br>w1.125.17.1                           | MDVRYESVAHYFKPINGTRVLKSIENCGEDFEPDEGRVHVLVVAPVTVLMQLDPPYCH<br>FVVDGVNIPITDNMAFNLPGLTGFWKAFQEVDTIEIANTAIKLPEGTFLLGDSNRGSCIYI<br>RSCYLQLWEITQKVQDEVKATNLVIDGNSGIGKTYFGYVMLLYLARLGETVVYESY<br>GTKKRVLSSHNVVVEGSQQDFSDILNLPFTFYIVDGVEMPHYQAKTIFLASDHTLWYT<br>FNEKRDQIRYIPVWSWDELSTCREVLYSDVPESVVEGCFHRWGGIPRYVLQY AQSEEK<br>QILLEKTMEIADFFWLLNGYEKLNANNPEAHRLLHYRVNDHFKEYFDFASPYVQQEV<br>YDRAYKKDKRVLLGFIGGGDGWKW* |
| >jgil133238le_g<br>w1.380.5.1                            | MQFLAKTEGKWLDPNEDLDTLLTLHRICTCSHPTSWKLSNPDLFGPGVSLGEDVVH<br>VLVVLKDAEAGVASVELSALPTVKQRHPERLKRWAANEMVRQRNQRNEKTSTRDT                                                                                                                                                                                                                                                                                            |

|                                                              |                                                                                                                                                                                                                                                                                                                                                                                                                          |
|--------------------------------------------------------------|--------------------------------------------------------------------------------------------------------------------------------------------------------------------------------------------------------------------------------------------------------------------------------------------------------------------------------------------------------------------------------------------------------------------------|
|                                                              | NKKRKNRDIDCSIPYSNLSWVDLEPILPMEEDLKLEECRPSKCSSRST*                                                                                                                                                                                                                                                                                                                                                                        |
| >jgil13996lfgenes1_pg.PHYCA scaffold_5_#_210                 | MVKLSLQCAIVGQIGSSFDVEIDDGEKVS KLKEAIRTKKHLTITCEADQLQLFLAKQPVE GDDGKEVVPVYHSSAEEVKEESFKWLPDEHRAALNLVNGEPDDYINSLTVGKQILGSK AIATWLYTKNNMELPSNEQIHVLLVHHLTQFK*                                                                                                                                                                                                                                                               |
| >jgil15135lfgenes1_pg.PHYCA scaffold_11_#_121                | MMHNLHGEAGNLKLTAELESPTRLVTDVVTQWLASMDMRDEEAAPGRTSPKTQME KSKDEERDEEVQKKRPKRKFRKSTINVRKEEK AHLLEELSGIAYQDGGDQSSSICHIHAL MSEYYLFNSPARGKMKTLTCAIVGVAGSAFPVDIDANKLVGHLKDAIKEK KMYQFPAD ELQLFLAKKADGAWLSSKDPEVISMRS GDIPQVKTLMNVEVDPTDDIEDVFEGAPTK TVHVLVVERR*                                                                                                                                                                 |
| >jgil15224lfgenes1_pg.PHYCA scaffold_12_#_49                 | MSDMVFLMLLFEHIVICVSLSSSIFDAITEKNKDPILKNVTAKNLKFLAKTESGWLS YDEDLVNKL LLLNRVDTSNVTATIVDEEREKFDLLSEKKGCLNVLFICATKYGDNLQE AFGPAKSVIYTEAMQSTEKKATTQYIHEVILLDLTTPQNRAAFFGLAWDDTLQTRLENV IHKAGGGNTAE*                                                                                                                                                                                                                           |
| >jgil20945lfgenes1_pg.PHYCA scaffold_77_#_13                 | MVQISLQCAIVGHAGSSFFVVGIDDGAKVNKLKKAIQRENPLTITCEADQLQLFLAKD GK HFGSGFKPDEGQVHVLLVVPVCAVAGSKAETIGQNVEMNGDGEAGVDIFSL*                                                                                                                                                                                                                                                                                                       |
| >jgil34764lgw1.83.9.1                                        | MMKLFCVIVGEAGSAFPVGIKPEDTVGDLKEKIKGKNTMTITCDAKDLQLFLAKTHAG WLSDNEDLDLTLQSEIDSSYL RMRASWKL SKPNLFGPGVSLGEDVHVLLVVPPEG                                                                                                                                                                                                                                                                                                     |
| >jgil49590lgw1.51.244.1                                      | MLELLCVIVGVTEWAFSVEVDETKSVDNLKGVIKNAKRNALTGINASDLQLFTA KTTD GKWLESNDPDIKMTSGDIPKQVKLLKDVDPVKDIGSVFQDAPTTMTIHVLLVVP                                                                                                                                                                                                                                                                                                       |
| >jgil502542lfgenes2_kg.PHYC Ascaffold_1_#_2_#_Contig261.1    | MVSSPLPSSTLDALAPPFYPSMTWYPSITDDYLERPHSPGKSGFVIADPVEPMAEIPDEE LFDPAFYPLSAMEMQELEQVDEINEILAE LDMESHQELHYKLSKTRRELRSSSDVDAEI YSMMAKASKAKNFSKQHVHLHKNTSFH SKRNMRSALHQPRSVK*                                                                                                                                                                                                                                                  |
| >jgil505958lfgenes2_kg.PHYC Ascaffold_17_#_43_#_4096633:2    | MAASPNK KIREASQLDQLKQFTTVVADTGD FEQINKYKQP DATTNPSLLFKA AQMEQY SALVDDAVAYGKGLSPDLSESERLGYVIDKLSVNFGL EILKVPGYVSTEV DARLSFDT EGTIARAHRIELYEKAGIKDRILIKIASTWEGIQACKHLQKEGISCNMTLLFGFAQAVG CAEAGATLISPFVGRILDWHKAKTGKSSYESHEDPGVSVTKIYQYYKKYDYKTIVMG ASFRNTGEITELAGCDRLTISP NLEELTKSTAKLDK K LDAETAGKAYTGEKLSYDEKDF RLSMNEDAMATEKLAEGIRGFSADIVKLEQILKAKLSA*                                                                 |
| >jgil508616lfgenes2_kg.PHYC Ascaffold_36_#_69_#_Contig4695.1 | MVKLFCIAIVGVTGGAFEVKIGYTKSVDHLKDAIKTVNKITLKDVDAPDLQLFLAKPKD GPWLRADNSDVISMRS GAIPQVKKLMNEEMNPAARIGDLFGDAKPTMEIHVLKVKSV SS                                                                                                                                                                                                                                                                                                |
| >jgil50894lgw1.79.118.1                                      | MLKLFCIAIVGVAGSVFAVEIGEDKTVYDLKNAIKTQNKIKLKEVDAGDLQLFLT KKKK KGEGMWL TEKDVQKGVNDTSDFNLLGTAGAPLKFVGLLKDDVEFKPTLEDVESMNTP VHVLVAIP                                                                                                                                                                                                                                                                                         |
| >jgil509061lfgenes2_kg.PHYC Ascaffold_41_#_57_#_Contig1845.1 | MGQGQSSIPTTEVAALVELYDALSGDRWRRRDGWKQPTRDPEQWFGVEVAMGHVVA LELPANELSGCLPVASLARLPNLRVLDLSKNQLRGEIPAE LGQLTALKRVDLSCNDLSG AIPRQIGACNQLQELNLYQNSLSGTM PKELGKLQSLRTLQLQHNNLCGALPETLCELTQ LTKFSVRGNCLTGRIPTDIGRLQSLVFLSLRNNELTGVI PPSLGCCCKALEFLNLSSNQLSG PIPETLGELEDLEYLYLFDNALEGRVPGSIARL KFLKESDFRDNRLRGELPNFLDGCSSLE AVMTKWKNRKASYRHAILGDPMPSPDTPPTSSHQFLQTLEDPPSNSSATFLSQSFDHKG SEGLGDGAPEDDPANNSHLVAEFSRKR VFQLPDSV VQAK* |
| >jgil509444lfgenes2_kg.PHYC Ascaffold_46_#_29_#_Contig2750.1 | MFWSAALDLKTQRAPNRLSYGSFNRSASNSSFHIPQSIPEHQPVSQFTSPLPKRREEYV ERPDTAFARTRASLQLSEHTQTALKMLLQGEREFK KPSLGRTIENKPKPKFAQDMYSMS KISSYSAHRAPMKELPERTPLLKPIARAHGQEEP NPQENSNEHNYWMQELERRRAGLRR SRRRTCTPM SERATTSPLKGVVVMCSVPLVVLVGFVLFIFLFGGSDASSNVMDVMNN LLGIGRGDDAETIARHAQDRDRIASTFARPPEKIQLEESIVMQLDVSSDHQKLRGSQKE KAGE*                                                                                                       |
| >jgil509452lfgen                                             | MESVVPCDLLDEL MHGVVILHHEAALVLGTTQFSVETFFPLLAYVLVHCRLPIIHAQLH                                                                                                                                                                                                                                                                                                                                                             |

|                                                                            |                                                                                                                                                                                                                                                                                                                                                                                                                                                                                                                                                                                                                                                                                                                                                                                                                                                                                                                                                                                                                                                                                                                                                                                                                                                                                                                                                                                                                                                                                                                                                                                                                                                                                                                                                                                                                                                                                                                                                                                  |
|----------------------------------------------------------------------------|----------------------------------------------------------------------------------------------------------------------------------------------------------------------------------------------------------------------------------------------------------------------------------------------------------------------------------------------------------------------------------------------------------------------------------------------------------------------------------------------------------------------------------------------------------------------------------------------------------------------------------------------------------------------------------------------------------------------------------------------------------------------------------------------------------------------------------------------------------------------------------------------------------------------------------------------------------------------------------------------------------------------------------------------------------------------------------------------------------------------------------------------------------------------------------------------------------------------------------------------------------------------------------------------------------------------------------------------------------------------------------------------------------------------------------------------------------------------------------------------------------------------------------------------------------------------------------------------------------------------------------------------------------------------------------------------------------------------------------------------------------------------------------------------------------------------------------------------------------------------------------------------------------------------------------------------------------------------------------|
| esh2_kg.PHYC<br>Ascaffold_46_#<br>_37_#_4103400:<br>2                      | LLENFAITADNANGEESYYVYCVHAAVEYVCNAAGLSGSTNPLGPASSASSAVTTPGG<br>CGLTPVAPMSSTSPPKQAAFSLDLELEMENELDVKVLGLSRDSGEEQPEESGTSALQ*                                                                                                                                                                                                                                                                                                                                                                                                                                                                                                                                                                                                                                                                                                                                                                                                                                                                                                                                                                                                                                                                                                                                                                                                                                                                                                                                                                                                                                                                                                                                                                                                                                                                                                                                                                                                                                                         |
| >jgil511091lfgen<br>esh2_kg.PHYC<br>Ascaffold_75_#<br>_1_#_Contig233<br>.1 | MKLFCAIVGVAGSAFVSVEVGEDQTVDDDKDAIKVKNDDIKCPARELQLFLAKKDKG                                                                                                                                                                                                                                                                                                                                                                                                                                                                                                                                                                                                                                                                                                                                                                                                                                                                                                                                                                                                                                                                                                                                                                                                                                                                                                                                                                                                                                                                                                                                                                                                                                                                                                                                                                                                                                                                                                                        |
| >jgil52465lgw1.<br>36.563.1                                                | MVELFCVIVGVTGSAFVSVKIGNTKSVVDHLKDVIKTKNKITLKDVDAPDLQLFLAKPKDG<br>PWL RADNSDVIRMRSG                                                                                                                                                                                                                                                                                                                                                                                                                                                                                                                                                                                                                                                                                                                                                                                                                                                                                                                                                                                                                                                                                                                                                                                                                                                                                                                                                                                                                                                                                                                                                                                                                                                                                                                                                                                                                                                                                               |
| >jgil52481lgw1.<br>67.119.1                                                | MAKLFCVIVGVTGSAFVFLVDIDQAESVRRLLKAIKAKKMYQFPSNELQLFLA                                                                                                                                                                                                                                                                                                                                                                                                                                                                                                                                                                                                                                                                                                                                                                                                                                                                                                                                                                                                                                                                                                                                                                                                                                                                                                                                                                                                                                                                                                                                                                                                                                                                                                                                                                                                                                                                                                                            |
| >jgil530721lestE<br>xt2_fgenesh1_p<br>m.C_PHYCAsca<br>ffold_750003         | MVKLFCAIVGVAGSAFPVTIDEGQSVGDLKEAIQVKNRETIKCDAKDLQLFLAKQPVEG<br>DDGKEVVPVYHRSAEEMKEESFKWLPDEHRAALKLVKGESDNYINSLTAGEQILASKT<br>LTTCKST*                                                                                                                                                                                                                                                                                                                                                                                                                                                                                                                                                                                                                                                                                                                                                                                                                                                                                                                                                                                                                                                                                                                                                                                                                                                                                                                                                                                                                                                                                                                                                                                                                                                                                                                                                                                                                                            |
| >jgil532971lestE<br>xt2_fgenesh1_pg<br>.C_PHYCAscaff<br>old_90155          | MSISEACTCSLQARLHQVENARSREMKAHGTLVQSLEIELESRRICEGESRLALAKLRGV<br>NCKLEAELQAAHGKARQLLEQLEAQRVETSKCEERLKVFEESDCQLRAAREKSDNLM<br>EEKRQLNVEVSEVKACLEKAKAENKVLHAKYEEKISEANAKTADIVQLTSQITDKQEI<br>EVATERSQLLLRELTTRYVQQELAQERIKLLEKDVNRTMVTRNRALNWRKRQELWE<br>NQFISHRIFLNWKLRSAAQAKFQSAAMARCNDTRSLQLIEMNVAQCSSAKEELNR<br>VRQACINECVQMQLRREICQTELPKLLTIVRNHQRSDNQQRHLEMQLVNQRESFERE<br>RERLNMSRQDFEHCVQKAIEEKRLFQKRQH HAMFQVFTSKKKWELHRRVFGAWKEFY<br>LRSIVGHATHAMVFQSQHLRASTSEVSRPIRRGESHQWTMPAPIRRGESHQWTMPAPI<br>RPISLASQHWRRIDRASS*                                                                                                                                                                                                                                                                                                                                                                                                                                                                                                                                                                                                                                                                                                                                                                                                                                                                                                                                                                                                                                                                                                                                                                                                                                                                                                                                                                                                                                                   |
| >jgil533583lestE<br>xt2_fgenesh1_pg<br>.C_PHYCAscaff<br>old_150061         | MMSEEQAATLSEDDGQLQRLETEKRELIDKLLKAVVAGKAMKKQLDDTRAENVLMD<br>EEKQDIVVKLQEVVTRYQAIQQELESKEGELMLAQSKVEAFQVELQAQQEADAKAIKE<br>LTTKFSQEEARVMVFQEENNRLTSQVAAMLEDKQQQEKETQTLMQDNQSLQNKVDDL<br>MQQVAGARQLQEDTEQNYLEVASKLNQVRENDELKNKPGTDASVELQSQLRAVETE<br>LAASADKWRQEQLEQQIETLTAVNKNNTTELADVADIREKLLVHV GIDLTYASIESL<br>LDTKNNEIQMLTEQLAAAEAPQEIQIREADKTVEDLRAELERVAEEHSLSLVTMENEYR<br>LACEELKTEAEKLTGQLDAAQTQTQQLNDDFSVERIHKSEENRLLVEKLEECEAALKA<br>RASEIEKLVARARTASSD TDKSGSSEMAACKAENLRMIFEVAKTADSVSKLKL DHEELL<br>EAHRKKSSEVDTVLVQLASLESANQTLES DLKKKSEELHNHLETCSMQKEDFESVVAN<br>LNNAVIAEKEKSKIKRDLEDMDKTENDVLEEQISELHAVAETKTEPDESQEKDREVEEL<br>RSSLVQAKVDFLEKQQLTALEKLLVAVSKSSGPTCTVNSTSLDAERREFEAALIEIE<br>MEKKLQVAYEAKQGLESTLQERMEAKTDLETRL SIAEDKITELEQQLEQKVALIATIEE<br>QLSRGKLEEKAI EFETFKTTT NMLKDESR LFN EIALLDKDKIAKSEVQKAAMADSQELA<br>NEELEEQNLADRIAIEIAEKQDLLARLDET VYRSEEDIHQRLRERLYMLEEEKSGLDDE<br>NFKLERTIEHLESKLD SLEEQA GLEAANEASSQQLSLEERVEKATSEIATLSAEKDSL<br>VELQQSLEENVSVLQEDKVKLEQTLDETSSKLRDELDRVTEQMESFQAQLAQSTAEKE<br>EVTIALAELRERSEADKLASGEVTAKLEAQAENQTLENKISVLKQMAEKALQSLQSSR<br>DELSEAEARASVLVEERDAVKVLLQEKQTA YEQLKTQREELQLRVEQLSSELESSQKRR<br>TEEAIAAEETIQTLKLTEAKL TESLESVKHDLAEAESAVMVLVEERDAARKEITARDLKI<br>EMM TSQQGELDLAAQKLESELSILRSKSSADSEATKEMLRDLEESKAQEETVRS LQGS<br>SAQAKESLQSIQEQLAESELRVATLEKERDARTSLNENMSTQETLSALQEDLQKKVDA<br>LEAELKELRETSSAELAAANETIENLNKNAEAEAEETLAALRQELAEAEAGCVMVLVEERD<br>ATKKTLSKRDLTLEVLSSHEGELQLKSQSTTTELENLRSKSAADAQAAEEALQSLREEL<br>KRATESLESTQNELAESESHVAALTA EYDMVTKAMADVQSERDLSGLNEELKESVED<br>LKNEMENRQKQFSSELES AEEAIRLTKTSEVKMTASLDSVEQELCEAKSSASLTAEYNS<br>ILATQKEKEAGISKLTSEIDSLQERIQALESELQELRNQRETEAQTAEETIRSLKESESQTV<br>ETLEAIRVKLSETEARVVSAD EEREAAASKALSEMESH RDAQSTEVE SLQERIQALESELQ<br>ELRNQRETEAQTAEETIRSLKESESQTVETLEAIRVKLSETEARVVSAD EEREAAASKALS<br>EMESH RDAQSTEVE SLQERIQALESELQELRNQRETEAQTAEETIRSLKESESQTVETLE<br>AIRVKLSETEARVVSAD EEPLEIGSLQERIQPLESELQELRNQRETEAQA AEETIRSLKESE |

|                                                                      |                                                                                                                                                                                                                                                                                                                                                                                                                                                                                                                                                                                                                                                                                                                                                                                                                                                                                    |
|----------------------------------------------------------------------|------------------------------------------------------------------------------------------------------------------------------------------------------------------------------------------------------------------------------------------------------------------------------------------------------------------------------------------------------------------------------------------------------------------------------------------------------------------------------------------------------------------------------------------------------------------------------------------------------------------------------------------------------------------------------------------------------------------------------------------------------------------------------------------------------------------------------------------------------------------------------------|
|                                                                      | SQTVETLEAIRVKLSETEARVVS ADEERE AASKALSEMESH RDAQSTEVE SLQERIQALE<br>SELQELRNQRETEAQTAEETIRSLKESEAQKVVELDSVKKQVLLSESSSSALD LASLR<br>EQVWAKDESHAADIASKDEVISTLKSLEEVM AAYKRLKGHLHELQDRLTQQTSTNDT<br>LKASYEELSGQKIAAVEELEALKIELASSEHSNTMAEELRQAEKVAVAEAQRESQME<br>NFKKRVLAYDDELAQMOKQHAVALQE QKETLLKTS AVREEAAATKLLEQKHDQAGT<br>SHEEASQKHEAERMELESQ LSSANETIEKRL LASVTSVGLEKEIAELKLQVETETEGANA<br>ARAALETYKKRAHTALKKASSENKLN LKKTSEATAKLEKELISAKSRVNTLETELEDTR<br>KRMAEVESAGDLLAQSTREAVESEKRSLEVTLRLEIDSLKAEVNRLEEALENDRQPLEA<br>QINQLSERNAALNQDVITLKEEIRSQTESMEQEVHTKEEEIRDLSKQLQAALAAAASLAT<br>NEAGRRYSPTYSPTTEKERRSTASSRSFSDGNN SFLHRSSIEEQSEHMAAAVADSCPIP<br>LASKMAPANGVNSQTDDEDEV CRLKLQ LNELETASHLFQKKYEDTSALLEEANQQKQ<br>RLQELCDGSTQAINIEYLKNVIMKYIESQVPSEKEQLVPVISTLLSFTPQEQQKVM AVHR<br>PNDEGAGLFGGVFSLFGGAAAAPPKPLAAPLNFKPSPTTAMSNTTGAALGSKDKNG<br>VLSFGSDPSDDEEFATPLNPF AA* |
| >jgil537103lestE<br>xt2_fgenesh1_pg<br>.C_PHYCAscaff<br>old_740004   | MTVKLFCAVVGFGNIFPVDIDMTDTVEDLKYKIKEKPNAIYFDASLLKLYLAREGDK<br>WLNSTDEAMRAVKARQCPDRIK NMQEHL LLDAMNFQTPDGVIVHLVEYPREDELG<br>SFLNWFPCWSSLQSLFSVEKEKRA*                                                                                                                                                                                                                                                                                                                                                                                                                                                                                                                                                                                                                                                                                                                                |
| >jgil537210lestE<br>xt2_fgenesh1_pg<br>.C_PHYCAscaff<br>old_790005   | MRPDFLLHYLGMVLLRGEEKSATTEIDE PVKELTAKMSW WNP MFYGDLPYILGYATSG<br>ARLRVVMIDRHLHSDAILEFQSIFQQR AEVIKLFYNLAFFH KMSVLAKRTCPSSLM PPT<br>PDVNRKRKIELMDDVIVRTIKRNQCRDRVDFRRLADIYATLQELNNRVRERTHLQIVRK<br>LRLKRLRLRVQLSPLGTVRPPMNVDEVRVWLQGMLTALKYWHSCDYCHGDLRWSNI<br>VYIPVSSDSGFVVLIDMDESRSNTTTIDWNHEFQGYTLIFEHDLFQLGQLMNSFTFSLP<br>SDLEDVQKALLTAVHTPAGDLPTILLNQLHD*                                                                                                                                                                                                                                                                                                                                                                                                                                                                                                                      |
| >jgil537308lestE<br>xt2_fgenesh1_pg<br>.C_PHYCAscaff<br>old_830012   | MKLFCAIVGVAGSAFPVTIDEGQSVGDLKEAIQVKNRETIKCDAKDLQLFLAKQPVEGD<br>DGKEVVPVYHSSAEVKE DSFKWLPDEHRAALKLVKGEYDDYINALTAREQILASKTI<br>ATWLYTKNNMELPSNEQIHVLV VQGRIEDVIDILAKLEKVDDVKKMTVILCVDGFQK<br>LVNDGEKTFGSTNADQETVDAVDRVCLNKKSKIAKIIRGMYS DLSDEENL FSEP*                                                                                                                                                                                                                                                                                                                                                                                                                                                                                                                                                                                                                               |
| >jgil537717lestE<br>xt2_fgenesh1_pg<br>.C_PHYCAscaff<br>old_1080013  | MFEKTMKGFGTDEDALSATLVRYHGV LNDIRPVYKKKYGKELRDRPVYKKKYGKELR<br>DRIHGETSGKLLALPTACAIVGQTGSSFDVEIDDSEKVS KKKAKIEKQEKISFKD VDAV<br>DLQLFLAKVPKEKQGEVERTEEVKDEVQEDMTWLYSRSE DVKLLKKGKETS LIEALTM<br>ERHELQGEDPLEDVLSGIDPPSVLQIHVLVVVPKGEDV VLA*                                                                                                                                                                                                                                                                                                                                                                                                                                                                                                                                                                                                                                         |
| >jgil544930lestE<br>xt2_Genewise1P<br>lus.C_PHYCAsc<br>affold_160416 | MPEPPALQTLDIVDEDGQHQQVVLVGGIEGGKQTVEIANEYGGFTTEEVTAVKTSEGEK<br>LVIEDAQGQATVVEVHELPAEVAATVTEDS QVVNAV TADNQQVQIVVEGEPEHGEQT<br>VQLIDEHGDVTVEQAKAIETSEG VKLEIKTDQGPVS VVVAEVPEEIKEEVIKEQEEHQPG<br>EFGGNPFTEEEPAVLQTVDVVADNGEHQ QVVLVGGIEGGKQTVEIANEYGGFTTEEVT<br>AVKTSEGEKLVIEDAQGQATVVEVHELPAEVAATVTEDS QVVNAV TADNQQVQIVVE<br>GEPEHGEQTVQLIDEHGDVTVEQAKAIETSEG VKLEIKTDQGPVS VVVAEVPEEIKEEVI<br>KEQEEHQPG EFGGNPFTEEEPAVLQTVDVVADNGEHQ QVVLVGGIEGGKQTVEIANEY<br>GGFTTEEVTAVKTSEGEKLVIEDAQGQATVVEVHELPAEVAATVTEDS QVVNAV TADN<br>QQVQIVVEGEPEHGEQTVQLIDEHGDVTVEQAKAIETSEG VKLEIKTDQGPVS VVVAEV<br>PEEIKEEGPVSVVVAEVPEEIKEEAAEDSMQGSKFMTKPEFREWIRKHYEDRLES LKVEE<br>QKLEDEERANAGR VKGLEDCIEQASNKFGY YGVYEQAPYYQNAVDWVEEECWTAQQ<br>WEPESPYEHPNLRR*                                                                                                                                    |
| >jgil547387lestE<br>xt2_Genewise1P<br>lus.C_PHYCAsc<br>affold_240409 | MSERLDDPTVRIKEKFPSEIPDRSIHVLVQVRREFLYNQPKPRDSSNEWLAEFFNHKVEP<br>RSLPFVGNLSSFVTQPLPAKIRVKQEWLNEWALSPGLQEKMFVLD DDDAPCMEFTSLIFN<br>KRTLNPFRRGKTENAFISMWDSIFRNVL DVLFQAHIDR DSCNGSSTRQKRPDFLFLVLD<br>QVCVFRGEEKPPDVNISVPTEELCSKLVWAYG SVPYVFGYAASGYDIQLHALYPLDPLK<br>VLTKNIGTFNLEVKEHLFQIVLVM LNLSLLFQAIAD ECPASGRDEF RDITRSSGVVRLSP<br>TFVEKIFPDISTFGHLELVYGH LKRASVPNVDR LTNLHFQKRLAVFKPRGTMVRPSNLL<br>DLFGALKDVLQALVALHRLGW IHRDIRWSNVIRQRTGNSWFLIDFVDAATDPQQYPSG<br>QHLSVEEHAPEIFVENG VHTTAVDIWAVGFLIETSGVEWLD FAGR TSLYRRLIAKDPAA<br>RPNAEEVLAELMALEESAKSEKEACENSRRSETQCRKRKLPDS*                                                                                                                                                                                                                                                                                                |
| >jgil563418lestE<br>xt2_Genewise1.                                   | MVKLFCAIVGVAGSVFEVDIDDGASVAALKDAIKNQNPKNLMNV DANDLQLFLAQKD<br>KGNVVEWLTEKDVQGGVSDTSDLKLLARARARLRRVGLSGEDIVEVDEQIEAEGGGPV                                                                                                                                                                                                                                                                                                                                                                                                                                                                                                                                                                                                                                                                                                                                                           |

|                                                                   |                                                                                                                                                                                                                                                                             |
|-------------------------------------------------------------------|-----------------------------------------------------------------------------------------------------------------------------------------------------------------------------------------------------------------------------------------------------------------------------|
| C_PHYCAscaff<br>old_120143                                        | NVLVELPPGTNRAPLSDGTDLWLSRFHHARISVLPTLGDLEGEYIEHLSL*                                                                                                                                                                                                                         |
| >jgil576078lestE<br>xt2_Genewise1.<br>C_PHYCAscaff<br>old_830005  | MVTIYCFAVDVEGSSFDVEIDDVAKVSKLKEAIATNQKFDFAASKLQLYLAKKGGKGG<br>VWLTEKDVQEGVSDTNDLKLGAAGAPLNLVGLSEKDVKFEPTLEDVESMNTPVHVL<br>VVIPSPDVGPKR                                                                                                                                      |
| >jgil576081lestE<br>xt2_Genewise1.<br>C_PHYCAscaff<br>old_830013  | MKLFCAIVGVAGSAFSVEVGEDQTVDDSKLAIKNQKPNLDKVDREKLQFLAKQPVE<br>GDEGKEVVPVYHRSAEEMKEESFKWLPDEHRAALKLVKGESDDYINSLTAGEQILASK<br>TFTTWLFKKNKMELEPSNEQIHVLVVVDPSSNAALEYKDPMSNLRKRGAEVMTDVMM<br>EDDAFVAEENRVRVNRVRCIIVGIAGQSF CINIESNARVENLQGAKKSRQRQLKDVEA<br>DDLIFLAEKADGAWLSADGAF |
| >jgil577802lestE<br>xt2_Genewise1.<br>C_PHYCAscaff<br>old_4740001 | MVELSLQCAIVGQIGSSFDVEIDDGKKNLKEMIQVKNRETIKCDAEDLRLFLAKKGN<br>AWLPDDPAAQDLEEGKVHTAIQALIDGEKMKARTIADVLDDNNMTGEERAPKSRQI<br>HVLVVVPPQWTVKRVTKPDDLSRAKRARIVRLEVAYQGPVPTDFYSVPAETIDTYQQ<br>LKEAFLSHERLVRPLCLLYGPRRFGKTTIGHRLVSLLEDAEPSILVIYCSLTPLSVESEEAF<br>WVALGEFIGEHTRSFQEF  |
| >jgil59630lgw1.<br>67.177.1                                       | DEMDSVAPYAWMETNEAVHDQRNAYMQYLKDNLHGVLHQDGSTTTPHAIRQPRYH<br>IKDTSMKTLNCTPEALNHGLKGTADLMIVGETAHRMNDVFTDLQLVVEVKKGGQCK<br>AYEQQLTLELVAANLCKEKRCAPIKLLTNLNDYWC FMWFTPDSKKARLTLSCPANGF<br>KAIKDFLAGAVDA                                                                          |
| >jgil60673lgw1.<br>22.466.1                                       | MVKLSCAIVGVPRNVFTVTIEDAASVSALKEAIKTEKKNV MANFAAEDLQLFLAKK                                                                                                                                                                                                                   |
| >jgil70314lgw1.<br>16.564.1                                       | MVKLSLQCAIVGQTGSSFDVEVGESQTVGDLKKAIKTKEPLTITCEADQLQLFLAKQPV<br>GDEGGKEVVPVYHPSVEEMKEESMKWLPDEHRAALKLVKGESDDYINALTAGEQILAS<br>KPIATWLYTKNNMELPSNEQIHVLVVVP                                                                                                                   |
| >jgil70333lgw1.<br>32.357.1                                       | MMLSLQCAIVGQTGSSFDVEIDDAEKVTKLKEAIQPKNRQTIKCDAKDLQLYLAKKGN<br>AWLPDDPAAQDLNEGKVHTEIEALINGNMKEAWTIADVLVDNKMTGEGGLAPKSSQ<br>IHVLVVVP                                                                                                                                          |
| >jgil71308lgw1.<br>16.631.1                                       | MKLFCAVVGAGQSAFEVKIDNTESVSFAFKEAIAAELRYKGRPDMLELFLAKTESGWLS<br>NDDDLITKLLQNRIDTSKLLKALWPTWKLNRANKPQLFGRDVS LGENVVHVLVRF                                                                                                                                                     |
| >jgil71310lgw1.<br>13.804.1                                       | MVKLFCAIVGVAGSAFSVEVDQDQTVDDLKDAIKTKNKIKLKKVDASALQLFLAKKG<br>KAWLSNDKTGDTVLSQEDVASFEQMRGWSRLNDPKLFGTSVLLTEKVIHVLVVIP                                                                                                                                                        |
| >jgil72559lgw1.<br>33.407.1                                       | LVMVSLQCIVGKEECFSFNKIDDGANVSKLKDVIKEQSGGLITVPPPTMQLFLAKTGR<br>EGWLTGDDATAVVSDDLNHFTLMDPTLFLVKDPKHFGEFGKPREGQVHVLVV                                                                                                                                                          |
| >jgil73233lgw1.<br>1.815.1                                        | MVKLFCAIIGEEGSTFPVDIDKQTVGGLKKKIKEENEDDPTLKTVA AKNLQLFLTKTES<br>DRWLSSNDSVVIAMRKGDVPEQVKKL                                                                                                                                                                                  |
| >jgil73236lgw1.<br>1.816.1                                        | MVKLFCTIIGDGSVFFVTIDEQTVGDLKVAIAAALS YTGRPDLLQLFLAKTEKNAWLT<br>YDKDLVKNL                                                                                                                                                                                                    |
| >jgil73237lgw1.<br>12.699.1                                       | IMKLFCAIVGVAGSAFSVEVNEDQTVEDLKTAIADNQKFNANSTLQLFLAKKHEGAW<br>LTQL                                                                                                                                                                                                           |
| >jgil80099lgw1.<br>10.758.1                                       | MVKLSLQCAIVGQTGSSFDVEVGEGQTVGDLKNAIKTKTKLKTVA AKNLQLFLAKQPVG<br>DESGKEVVPVYHPSVEEKKEESIKWLPDEHRAALKLVKGESDDYINALTAGEQILASKT<br>IATWLYTKNNMELPSNEQIHVLVVVP                                                                                                                   |
| >jgil81603lgw1.<br>5.1157.1                                       | MVKLFCAIVGVAGSAFSVEVGEGQSVDDLKEAIKNLKRNDLKGVD RDKLQLFLAKK<br>NGKGVWLTEKDVQNGVSDTSDLNLLGTMGAPLKFVGLLEKDVKFEPTLKDIESMNT<br>VHVLVVVPPKRTSTAIVSEEK                                                                                                                              |
| >jgil81615lgw1.<br>2.1184.1                                       | MVKLFCMIVGEVGTAFSVDIADGDSVDDLKKAIAENQKFGFAASKLQLFLSKKNDTD<br>EWLTEKDVQGGVIRDTSDLKPLVVARQILSTATDVEVKIETKAFEAEETSPVNLVVVPE<br>RDSTA                                                                                                                                           |
| >jgil83070lgw1.<br>12.944.1                                       | MMKLFCAIVGAQGTAFSVDIDVSQSVGDLKKAIKHKNE DIKCPHRDLQLFLAKNEKDE<br>WLSSKDPDVIFMRNG                                                                                                                                                                                              |

**Supplementary Table 17. Predicted RXLR effector amino acid sequences and location in reference genome.** Location is scaffold followed by the direction of the first nucleotide based on the reference genome (R = reverse, F = forward).

| Location               | AA Sequence                                                                                                                                                                                                                                                                                                                                                                                                                                                                                |
|------------------------|--------------------------------------------------------------------------------------------------------------------------------------------------------------------------------------------------------------------------------------------------------------------------------------------------------------------------------------------------------------------------------------------------------------------------------------------------------------------------------------------|
| >scaffold_1_R31<br>4   | MKTATAFATVLALIVATNAAQVPPNPTLRGLRPTADTPSVEDDKEDRKDHHHVKKVKKIAIPVVPVPEVPQ<br>FIPVVPVSPSTVVANSNNAVVGPPSTNVAGPGAAAPGAPGAVTPAPTTLNGRPAATPAATSTTRSRTPT<br>APTNFAGARASGAQLPAAPVQAGAPGMTGFPNSAGVGDNTNNAFAGAGIGAAGGFPMAGNLAGGGFG<br>GNPMNRFGGANGMGSGGIFGGAGTGPMANGFGGNGFQSMGFGMQDSNGLGGFGGQGMNTNFG<br>QAGNNGFGGGQGGFGGGFNRRERL*                                                                                                                                                                     |
| >scaffold_63_R3<br>81  | MVNAMTMAIVLCTIVLRCCSSRLRAALKQEVRLRADAAQAAQTASNISGLGTRLNALIARVSDLEKAFQAS<br>QASHHP*                                                                                                                                                                                                                                                                                                                                                                                                         |
| >scaffold_22_F1<br>619 | MGPLTGISLTFVACSRGSLGSSAFLLISLDSTAAASWSRVASRQRNKKGNACMRISKRLRLSLKTTKTMSY<br>PTS*                                                                                                                                                                                                                                                                                                                                                                                                            |
| >scaffold_52_R1<br>150 | MRLGLFLLVALAALFASCDASAARPVNDLPSGRFLRGESFKESLKILPKTYVKELVDDGDKLKAALQSWSDMK<br>LSRKRLAKSLELSTNRRIKLRKIANRHKVNEVFILDQYVKHLKQLKRSRPLRVVE*                                                                                                                                                                                                                                                                                                                                                      |
| >scaffold_8_F31<br>04  | MSLIWRIKFVAAILLAGCNAFSDAPSHLTLTESALMLRLIDTDPDHIGSRDTGKRFLRRDNDDEALDFDTEEG<br>KSSHPKMDKAVISPSIQGLSGQIPTALYNFLKI*                                                                                                                                                                                                                                                                                                                                                                            |
| >scaffold_438_R<br>9   | MRLFPLFVAIATFLIATDAFLMTGDSNQISNVDSPPGSRQRLRAHAEVDFEKEAKEMMRMMKMKVTKED<br>FAKKLIAEEIDDIINKRAPGMHEFMQTVKYKRYANYMNFNDMAKTSEYGLVKEIKAKSRAQVALKTFRK<br>PTTSQSRWQSILASLKGKRIGK*                                                                                                                                                                                                                                                                                                                  |
| >scaffold_87_F3<br>00  | MKSIYRVLLLVTFALLCGLSNAVNSGGRLRVVDSTDERGGFPSYKDSFTKWRINSKIKSWVKKQKTDEYVLS<br>KLGLSTLTGKDLVKAPKYSQFQDFKVGMMWLKEATPTTTFVNTLGLNKVEGAVEKADDFGTYYKVMALGEK<br>ADDYPLVTWRKLFGGGSLEQLELKRKILLVCRDEIDISVMLG*                                                                                                                                                                                                                                                                                         |
| >scaffold_29_F3<br>65  | MRFAVVVLAFAVAVASTDSAVASEQAKLTSVVVAENSLPHTSLTAEQEQRLLRAASDGESEFMERTKFYY<br>WYAMGRTPSYVYEDFFKGMDSIAENPNYKVVWERYKAYYEKRKAN*                                                                                                                                                                                                                                                                                                                                                                   |
| >scaffold_10_F6<br>08  | MFCPLCVVYLPGLLLCSSDCIIPMYSSVQESAERLPLENRRRPPYRNRPTSITILEIPQIGRQPQVDRHLRLP*                                                                                                                                                                                                                                                                                                                                                                                                                 |
| >scaffold_52_R8<br>22  | MKILRSLTFLLIGTVAQAENSSKLLRGPDPNYDVAGLFPADTVVDTPTKEFEPEVDEPVIPTLLNELDE<br>NSVERLVTEVTTYDDYTSEYNRHLRSVNDPAFQGGIQLAEPHHPKEHMIPSPHDDQVPLNRGWT*                                                                                                                                                                                                                                                                                                                                                 |
| >scaffold_27_F8<br>34  | MQIRVIALALSALGSVAAVQTTDRSLGTLVGCPAVRSKSPCLWAGENGVEVDSRALRELFLERHYVAHSD<br>REAYGRNLQEHMTYIEGEDDKAFIGLDTVY*                                                                                                                                                                                                                                                                                                                                                                                  |
| >scaffold_623_F<br>5   | MHLGHLLFVTIVILLASSDGMSTQNAKKPIEDTVVGPSNSNGIKKTRALRTDNGSEERGFLSNLVKEAKVR<br>WWLETGKSESQVKAQLLDELGKAFETNTKLFQKFKATKAYANKLNKWLQDDATTYSVWKILKLENVSSKQ<br>LKSSPAYRTYVDYVNVQFDELLQRKWGAYKLPPEMVGSSKEMMAKSSIWGEAKRYEAYVKMALDMEGVTG<br>KALKEHKNYAYNNFLEALKGN*                                                                                                                                                                                                                                      |
| >scaffold_25_R1<br>072 | MCVAPPTICLIFQLCQGLAEILNDQVCRQNHPARQQLAISIGYMLDAARAVAYLHFSFPAFVHRDINPSNFL<br>VDAECNVQLSGFGESRSTVKRNGRALRPKMKVPELEAKYFTLNATVASPLGTTTRQLDSPCTHMEKNSAEYI<br>APELIDGLSEPFYGEAADVYALAITLWDILHPNGDKYPQANDDYVQVHVFEVCLQGLRPRINSNLPKLCSSII<br>ERAWQQDPGLRPSAQIVKSLEDFQDDL CARLVLDLISDFHDCSSGSLRTTEDLHVRYTYGAFIVDRMIDRR<br>FVRCPAEAIIRLGNALMDSVLHGHANHSTSFENNSASRYFDVDEAQLALPIDSHIERSVRSSSSLMNESSIA<br>MLNVGHNDAPRSSFVGRTRSEPPCRCRQLGQRLINRSTHFHRVQVQLTALEPTVDGNTLTALLGGDE<br>ASPQNSYNGLDMTPGIAATMA* |
| >scaffold_25_R3<br>36  | MYRVLLLVTFALLCGFSNAAKSGGRLRVVDSAEERGGFPSYKDSFTKWRINSKINSWVEKQKTDEYVLKKL<br>GLSTLTGKELVKAAYRQFQDFKVGWVWLKEATPTTS                                                                                                                                                                                                                                                                                                                                                                            |
| >scaffold_68_F6<br>89  | MRLNLVLAAVITLVSRACTAVSAASSTNQINLSNLNQLNMQNHAGDGNRFLRSKIVNDDIDSDDDIDR<br>DEEERGGKTWAEKFAKWHARGESADDVYARFALEPVVRQAYKYGGQIGRL                                                                                                                                                                                                                                                                                                                                                                 |
| >scaffold_24_F4<br>44  | MRLSFLLLTATFVLLSSGIVASPTTKDESIPSPNQVLSEGRRLRVHKSSIDDVEERGFNPEKFNRLMNERGYRST<br>RFSNWWNKNYTDRYVYNLLRVDSPNYKRIFNYQTYLENFAPRLISS*                                                                                                                                                                                                                                                                                                                                                             |
| >scaffold_11_R2        | MAVWIVIAAATALVRVSGGGRILVNCSWIASICVLPRLRLADVDMAKMAARRRVFNGLAALYDCLTSS*                                                                                                                                                                                                                                                                                                                                                                                                                      |

|                        |                                                                                                                                                                                                                                                                                                                                                                                                                                                                                                              |
|------------------------|--------------------------------------------------------------------------------------------------------------------------------------------------------------------------------------------------------------------------------------------------------------------------------------------------------------------------------------------------------------------------------------------------------------------------------------------------------------------------------------------------------------|
| 784                    |                                                                                                                                                                                                                                                                                                                                                                                                                                                                                                              |
| >scaffold_50_F8<br>48  | MRFFYFLLLSAALLSNSNATATVSGEGHVMTSADAPARALETNNGKRSRLRYATDEDEVETDKYDQKNGKY<br>DNDDEEERNLQRHNSPNGLKRRRAGSRRIGRREYESDGGGR*                                                                                                                                                                                                                                                                                                                                                                                        |
| >scaffold_46_R1<br>328 | MRLSQVLVIAVASFVFASDTVAVATSNQAKISKMEQSPSQRLLRSNHYPVKEEEDSEDSVDFEERGFTTPDE<br>EDLEERSPLSSATVKKLENIAGWGTTYSSVAMGTSSVSQTKAKALLALRDAYISIGIKSEKNAAKMAILMANK<br>S*                                                                                                                                                                                                                                                                                                                                                  |
| >scaffold_24_F1<br>432 | MRLFAVVLILAACLAADVPALNDAPSKRLLRSTVRVDEEEERGAWDTLSNKFVKVILKPNQFAVRNMDDP<br>KVAKAAKTLLKTFKSVDPQKFNVENFFRGKAFNNLENYVLRNLKQDINKQTSVAKVLSTGLGDEKAFHFL<br>TATQSSDRAVKKSGKFFRDQLLTQWAVEGKTSAEVTKLFPKGLGANYYLHLENKYSGILMDLARDSQKRATR<br>LAKLERARAAAT*                                                                                                                                                                                                                                                                |
| >scaffold_25_R1<br>150 | MCVAPPTICLIFQLGQGS�AEILNDQVCRQNHPARQQLAISIGYMLDAARAVAYLHSFSPSFVHRDINPSNFL<br>VDAECNVQLSGFGESRSMVKRNGRALRPMKVPVLEAKQFALLGTVASPLGTTMTQMDSPCMHMEKNS<br>AEYIAPELIDRQSEHFFYGAAADVVALAITLWDILHPNGDKYPQANDDYVQVHVYECVLQGLRPRINSNLPLK<br>LCSIIERAWQQDPGLRPSAQQIVKSLEDFQDDL CARLVLDLISDFHDCSSRSLRTTEDPHVRYTYTGAFIVDRM<br>IDRRFVRCPAEAIRLGNALMDSVVLHHAHSTSFENNSASRYYFDVDEAQLALPIDSHIERSVRSSSSLSMNES<br>SIAMLNVGSDAHPPFSVGRMRSEPPCRCRQLGQRLINRKSTHFHRQVQFLTALEPTVDGNTLTALLGGE<br>EIS PQSAYNDLDVTPGIAATMA*               |
| >scaffold_6_R18<br>84  | MRVLSLVTLFAVSAQLIAANADQTGIAAVDSNTALLPRVLGVESKRTLRRYDPSEFDSEEAVDSDEEADPVE<br>VADSDEEVVSEGEERVGIPGMEKVKASKATKADDMPVNAAGAMKWKILVQKNMGQLVETAKLVKLLKVG<br>SFYSNVELEKMSLSALRQLDDIQQLQKADIKSNVFGTKATANGMRRKMTRTENMKLPPEQFLVSHVGRGA<br>QRLGENGQRLLSAAVISKGGDINSKVLIISSSDTKKGFLLPKGGWDHGETIEKAVLREVIEEGGVNGQLLHKL<br>GEYFPKKGATAYAYMMKASTVYDDWAESIRYIWRVTEMLWKY*                                                                                                                                                      |
| >scaffold_10_F2<br>067 | MRLSVILLVVAAFVAALDPATAANDANTVVAVPNVHESIATGRFLRAHLEDDYPVKDERDEDDNEKDEER<br>MFSFFQEKATALSFAKNLVSQSGDDLVEAVSNLTKKEFVALFNQGHTHMAKMVPGFHPGMSLDEFGAVVR<br>AAGLSDDMKNALMVGYGKYLALHMD*                                                                                                                                                                                                                                                                                                                               |
| >scaffold_58_R5<br>67  | MVFKCWRLTFVVLVTAPEILKGEYGTAAADWWAFGAVLYELLTGLPPWYSENAREMCKRVLRTPLSVPEY<br>VSTEAKNLLQKLLTRNPYERLGSLLGGPEIKEHPFFQHIDWEMLSRDAPAPIQPCATSOTVVRPVIIPYVDF<br>VSNFLPCL*                                                                                                                                                                                                                                                                                                                                              |
| >scaffold_13_F2<br>050 | MVSVSSVYLSAVLAFATLQGTATSLSLDPYTTCTSYENFPGRDTDIKDGGSCTVIVPEDPSTSTSKRKLWV<br>DGNDIADLEAHFGVPMERKLRLNPTSTHSSPPWSSGNWLVNVD SINYVWDQGGQPSAAEKYATAFGLDV<br>KTFMDDVSAQNGIDSVQNATECTEDKECYEDLICAKRAGKSSGRCLPTWWGMGNAAAAATLEKEPKCP<br>VTFNGVTFQPMDIKALVTDIYDSANVSVFTGSRYNGYEDSIDDYGRHTDASYRDLNPGFLHIAATNMLGLL<br>NTTFIVDKDPDYVWNQPVVGFVREQMNMTPAEAAKLYGLDYPWNVNASSIVVNSYLSWVTESLN<br>GPIVTLNNTTETGNITYLLELNDDEEIIIGGEWLYDSNDYHPDFLWLEAKPAPDTATSFGLSYTNVTMLLEKATE<br>C*                                                |
| >scaffold_12_F1<br>755 | MQTIRAIVTAALTAVAGDEGATRTRLRGAMADNSELDQLEGSGSNNSILWVNASKPEERRPIRPNYHHGH<br>QQLVCQINFPKNCWYVDIFDQ*                                                                                                                                                                                                                                                                                                                                                                                                             |
| >scaffold_81_R7<br>5   | MRSALVLLSTALLACIAGVSTTNPFKVTVTETFRLRKSDPKTNEERVIGGSLTSKVGDFIGSTKLQKYKLRWKT<br>LQLDDDLKSVLKSPQVEKIAKYNLNKASGSQVSMFRRIAAYSDDILARTLSIERSADDNPALLAMVKQLRE<br>DQIANWLKKNKTVPRVSKLKLGSDESIFRSKALDVLDFIKKYNTARNGDESLLKLTITTYGGESELVTMISRA<br>YPYAQLNPQSVEKANNIENQLISKWRSENRPDFSVMSKVKFGDDINEALSSGKVRVFFKYSASKTMALKRLN<br>AKYGEGEVAVAMARAKSTLSGHDAVVVQKQMTGWLSNGYSMERVFSILRFKEADDFYKLDALAEYVK<br>LLKSKNPQDTTNILQVLRKGFNGEEDKLAIALSRPLSEEAKGYQALLFKDWMARDMDPMSVAVSVFKIPEAD<br>VAAGFSKEITPIMKQYTKFYNGAADIQPLPPAVRNGRS* |
| >scaffold_81_F1<br>03  | MLLFRLLLLVAIGTFLVSDSVLAASDDSTFARRFLRTDDSEKINLSGLEQSASLKVGLKIDNVWDIKLQAKS<br>DTAFKLLNLDQAGEKAFKSPQFKTWSYMSISSEKYPEAIMSTLAARYSDETLVKMIEATKKFEGMEGIAMK<br>MQEAQKKNWMSQSGKTADDLFEVLKLDKRSMENLLTNPKLDIWSGYLNLFNKYSKPGKETTAVNTFVTFYGD<br>EVVAKALEAAKKVPNTKEKATELQALFTQWLMEGAKPHQIWKMLQMEKATWMRNPDANIWREYLAFY<br>KLHK*                                                                                                                                                                                              |
| >scaffold_47_R6<br>72  | MRLAFALLVLGAVLLSISVSTASTQADKEDDVVPSGEDTRFLRGLTDDSEERWGIRDLFGRKKFEQMLLNN<br>WDELNKFVDTVISKLGKTYGAELLYLNSRPKAVRAAAK*                                                                                                                                                                                                                                                                                                                                                                                           |
| >scaffold_17_F1        | MGVTVLVLSFSVSGGKSSMCPHSDCIFDLHELMYNLQISAISFGGMQQNGSMLTRAVSQRNSNPTFM                                                                                                                                                                                                                                                                                                                                                                                                                                          |

|                        |                                                                                                                                                                                                                                                                                                                                                         |
|------------------------|---------------------------------------------------------------------------------------------------------------------------------------------------------------------------------------------------------------------------------------------------------------------------------------------------------------------------------------------------------|
| 914                    | CVPSLSRMLRILSGKSYREK*                                                                                                                                                                                                                                                                                                                                   |
| >scaffold_31_F1<br>334 | MRLLLWALLVTLVAFVSSINAEFTADSKVTQDSKEEINALTRLLAVDSSDAAKRFLRGDAKDLTTANDDSKELS<br>AEGEERGLIPSSITNLVSKVKTGWANWKAKALEKAFQHMVKNGENPTTLAKRLDIGRTVEGRHHRLYEKFTA<br>WWINYHTVAGT*                                                                                                                                                                                  |
| >scaffold_143_R<br>10  | MRASIVLVAVIAVFRSGLASASNTAQLQQTVPGATNKVENAEGGRFLREGLKDESDDLSEERGIWGDLPK<br>KAKPYLNGDIMYARLFKKSNSQLWRREITPDELKSMVIHLEKAGWSGEKQLQKDKSHGYEKYFYTPIKD*                                                                                                                                                                                                        |
| >scaffold_40_R1<br>065 | MAFSSFLKFLAMATLLMVQINAEPSSQQRNLRIQSDDLPEEQARRLGNWVKALIINVKNNPGVSDGVVNL<br>KKADFVTGTSKKIKEVKDTAGKVKDKVTGK*                                                                                                                                                                                                                                               |
| >scaffold_51_F6<br>03  | MQLTNILWMAIVILFSCNDAASRPELPTISGVDVAVQLNPVNQRFLRSDYNSEERAVTLPFAKLDVAVAKL<br>TTKLFNTEKLAALGKTKAEYNAREALFKEVNAVNPVAVRKAFLAKLAKSGDYNWLLPYWLGFKLKGIRKVVET<br>EIKNAVRAGNAVS*                                                                                                                                                                                  |
| >scaffold_2_F40<br>6   | MVVVGVGVCVASSATYAVPTDPDCAIFSSPQGVWNYKTGILDIPYGRVWNGRCWAVRPIRKRPAKLRKR<br>RSRNQQRHSRPRMLRLNLWLEPLVKTAKARAMTQMKFNLLTERRRSRKRDPVPRQRPQYAPGTARSVEEK<br>AALRPVGVQVICYACSKPGHFAKECPDAEANARNDAYLASRIQRSAGKYNERSL*                                                                                                                                              |
| >scaffold_107_F<br>190 | MRVLSLVTLFTFVSAQLVAVNADRTGIAAGDLNTALLQGVLAVERSLRRLRYPSEFDERESEEEADSDEEVD<br>SEDEERQIGLPGIEKLDLDAVSKFTKTDVVSQAADDDVVEKAAKASPKWKALMLKTWMSLLRPEDW*                                                                                                                                                                                                         |
| >scaffold_1_R39<br>4   | MKTATAFATVLALIVATNGAHVSPNTPALRGLRPTADTPSVEDDKEDRKHDDHHVKKVKKIAIPVVPVEVPQ<br>YIPVPSVPSVTVVASSNNAVVGPNSTNVAGPGAAAPGAPGAVTPAPTTLNNGRPAATPAATSTTRSPTP<br>APTNFAGARPSGAQLPAAPAQAGAPGMAGFPNSVGIGDNTNNAFGAGIGAGGFPMTGNGLAGGFG<br>GNPTNRFGGANGMGSGGMFGGAGPAMGGRLNGQSMGFGMQGGNGLGGFGGQDMMANFGQGTN<br>NGFAGGQALTQGGFGGNSFGGGFSRQRRR*                              |
| >scaffold_17_R1<br>815 | MKACKFLVLLPSQALANHAVLHVVDRLFRYTAIQRELRKLVGDYVSMRTEMNQCCQKWLALRHEHTT<br>TLDRLEKIETRLDSLVEAATISMNKLQ*                                                                                                                                                                                                                                                     |
| >scaffold_11_F1<br>315 | MRIGYVTLTATTAILASFGNVSGDSDLTHTQVAKVASLDAVLPINTNRFRRRENYDDEEAATEERSAFEALA<br>AKLDKSVLPAPFLKIANVKDSERAFHILQQYPISLEKRLDILALHGLSKSDRKKVLLLIQ*                                                                                                                                                                                                               |
| >scaffold_14_F2<br>398 | MQPTLVIFVNVLLLLVGLIGRSDAVHFDATAQASPSDSTIESKTATNERFLRGNDKTIRTTEEDRDITVGLSVI<br>ASAKAVNMRNKINIMLARGLSPTRVLLKLVVMSDKNFNNFARFYARYLDKYSRKKPNLPKTAEDVIVLPK<br>MKDWLAQKLLPFQVEQNLKDLASRNVNRYMQLYFKDADNIIILPRLERWENQKLLPSHFKNLIEIGVKDTT<br>KYM EWYMRNGGEQVVKAKLQKWLROGIDPREIGAKLRKIGVTD TAKYVAVYIDAPVVTKLKTWVNTGLR<br>PPQILDELIRAGVTDIQRYYNTISVIYQQRQVRLYRKNLP* |
| >scaffold_53_F9<br>3   | MRFTYFVAVALTGLLASNDLVVASTADKTVVHDQVLSRELIDTGLNDNEKRSRLRTNEDLEDDSEDLLKSDDEE<br>RFSLIQLSNQPRYYVWFEDEMTPKDVRRKFLTRHSIKLVKRSIYRGYVYKYDEHCSYFENRKKDFCRAQEY*                                                                                                                                                                                                  |
| >scaffold_18_R4<br>67  | MRLNLVVLATVITLVSRCATAASAASSTNQTNLKLDQALGYQVGTMQNHAGDGNRFLRRAKTVDGSDDDI<br>DSDDEERGGKTWDEKFAKWHARGETADDIYGRFFLEPIVRRAYKTANIGSLKQHEYYQKWLKYAFLKAKE<br>K*                                                                                                                                                                                                  |
| >scaffold_25_F8<br>10  | MRITYILAVTVAATLHSSVTAIPSVKSSKATENGAVPAVIDSTHAGAGRMLRWVKEYEEDLDDSDDLDDDL<br>DDDLDDDLDDDLDDLEERGFDTLKKANPLKLVKGTCLTAEQAQKVEALKDAADYQKMIENANKLIRS<br>D*                                                                                                                                                                                                    |
| >scaffold_6_F39<br>33  | MRFCFVVLATV FALLSSETPAIATAEKHSEALSFINGNNGGTANRSLRSHDKVNAVEEERAIDADKLVKLLNP<br>DDIAAALKNYDDEVLFTRWWQHEDDVVNKLMWPNRMKNMPILTKFNDFRSTSMHYDQVLTWPWLSTK<br>DLDEVATALRASKMNLAKEQFNVWHKSGVKPAEISAAIEKVNPLKRRKGYGALNGLYKMYVSGEAKKTARA<br>AAKKT EFAAKRAQAKKIAEAAA KRAQEIKTQKETAKKIADAAAKRAAELKAKAAVAA*                                                            |
| >scaffold_193_R<br>7   | MSKATPNLLGISWLLGSLVGSYHLLNRPCLCAWNGRLNWPPRLGVGLRFHQQRRTLIYLEMHRRYLLLLQL<br>TPCFLPPTLHWRHLRRQRSTKT*                                                                                                                                                                                                                                                      |
| >scaffold_686_R<br>5   | MRFHALLAAFLAFGSGND AFELTADGAAAYSRLRSEPKTNEERVFEGLTSKVDLIDTTKLQYKQLQWS<br>KLQLGDDLTA VLKSPDVAKIAKFNLRASGSQVSMFQRITAKYSDDLARTLVSIERSADDNPALLAMVKQLR<br>DDQIANWLKNRETVPGVVSKLKGTDSEIFRSKALDVLEDFIKKYNTARNGDESLKLTLLTIYGGSEELVTMVS<br>RARATYPYAQMNPQSVDKASNIENQ                                                                                             |
| >scaffold_5_F19<br>44  | MRLSYALPATIIAVTFLSSGNAVATTDGGTMDLSAMTSPNAVASIDA AVGGGKRSLRYHNKDPEDSDDEAL<br>LEEEERKYTNMFSTTKLDEMLEDGTMMSRFKWKKEKGYNTYNLPAETQGDKYTWIRQKYRDYLYHN*                                                                                                                                                                                                         |
| >scaffold_2_F15<br>74  | MGLHLLLAATTFVACTNAADQLEMPVKRGLRANEERAFGAGVTEGLSNWVARAAPKLLLDNELEHLA<br>MKVTSTDKVFKMLKLDGLDILRNPNLKAFASYIRKVHATNPQVLLITLITRYGDDTLAKFLFEAKQVRRTE                                                                                                                                                                                                          |



|                        |                                                                                                                                                                                                                                                                                                                                                                                                                                                                                                                                                                                                                                                                                                                                                                                                           |
|------------------------|-----------------------------------------------------------------------------------------------------------------------------------------------------------------------------------------------------------------------------------------------------------------------------------------------------------------------------------------------------------------------------------------------------------------------------------------------------------------------------------------------------------------------------------------------------------------------------------------------------------------------------------------------------------------------------------------------------------------------------------------------------------------------------------------------------------|
|                        | ESAKMLQAAQFIKWFDGKTPNQVFNLLGLKHLTAYEDKFHKLWWEYVVAHYHLASKLKKPLPVEL*                                                                                                                                                                                                                                                                                                                                                                                                                                                                                                                                                                                                                                                                                                                                        |
| >scaffold_24_R7<br>96  | MRFTYFLLVATAALLASCNAAAATSNNQNKLSTMTSTDAVVSALESSNDKRFLRSYRKEDDGDSDDEEERS<br>VMTAEQVAKWTKKVERWVKKGHTPSYIKDKLTALDGTMNAKNREKYRMFGAAWGRANPHELGRM*                                                                                                                                                                                                                                                                                                                                                                                                                                                                                                                                                                                                                                                              |
| >scaffold_10_R1<br>115 | MRLSVILLVVAASVAAGVPTAAANEANTVVAAPKLPTARFLRAHLEDDYPVKDERGEDSDDENDEERMFS<br>IFGEKATALKAFKKLVSSEDDDLVMAVSALSKEEFVALFNQGOAAMAKMVPGFPRGMSLDDFATAVSSAGL<br>KPDMQNALMVGYGKYLHQMG*                                                                                                                                                                                                                                                                                                                                                                                                                                                                                                                                                                                                                                |
| >scaffold_3_F29<br>10  | MATLVVCASNFALASTVADDLHQEAEGNVDRRLRAAAPANKDNVAKIAGGFLTKEGKSTLTKEQMIKNA<br>NGDEAAVKKAILLASTAKESAKMSDESIAKLSAMITTAUVKDPKSWPRLQKFKVKTLAGVGGALYLGAYKLL<br>FNKNSSSGPVTTTTGSADLVAASTSGSGSA*                                                                                                                                                                                                                                                                                                                                                                                                                                                                                                                                                                                                                      |
| >scaffold_26_R1<br>068 | MLLCVILAFNLTVILVLCPRIGRVFVSFSTVAAVWFDAGDTVLSPLVAPSSWFVIRLAAAFSGEWILGEDS<br>RDLRPDDMDSRSLVTILTEELAEVGGVEAEGRFCSWLVGFLPSAIVDCEDRMIFELLPWGRFDTSVSLATC<br>R*                                                                                                                                                                                                                                                                                                                                                                                                                                                                                                                                                                                                                                                  |
| >scaffold_8_R11<br>92  | MWLLLCVGFVAFVSCVDAVRLGSRVLLCPPSSPPYRTPYCPQQFSHPRPRYEDTPQRGLRAFGAPALDGFVLR<br>CRIVPRSSRLTLQPVLLTV*                                                                                                                                                                                                                                                                                                                                                                                                                                                                                                                                                                                                                                                                                                         |
| >scaffold_93_F9<br>1   | MRVLNLTMLGAIAFIVNMSAVSSADKPQLAVAGALPISRFLRTHYTDDEERAIGNLLPGSKKISSFMTDKKLSK<br>PQEQRNRNRRRFQQTARQGRQVREPEIPRLGSIIRGRFQPETPDPELDASHACATVWR*                                                                                                                                                                                                                                                                                                                                                                                                                                                                                                                                                                                                                                                                 |
| >scaffold_24_F5<br>45  | MQSAAYIAAFAAMLAAVKAESGSILQGRQVLRGQLRVHQCADHALGHRGRQAVPAVHEGGRRVLRHLPG<br>SVPVLLHVEDGLPVH*                                                                                                                                                                                                                                                                                                                                                                                                                                                                                                                                                                                                                                                                                                                 |
| >scaffold_2_R11<br>64  | MHFHSFIFLHHTSMTTSAASCSEAAARSRTIELLAPVYEDVCCAIKGGSTTVPVTLERTADDWIQLVFPQT<br>NVRKDVACVNGASGCRDFVRLLRALLTLTEQLVVKVAATYVLAHRSADVATLEMRVQVHEEARRGTSLRD<br>FDLVLCHLQATVLSVVSRSKGKKIEARHEALESARSSSCHVVGCRLLHPWDASSGQFNPSIN*                                                                                                                                                                                                                                                                                                                                                                                                                                                                                                                                                                                      |
| >scaffold_214_R<br>4   | MRLAIKTLVALAAVLLATSTEAAKAVQTGGDVNVVQSSHILPGENKRLRSEHDEGKLEDEEEDDEEERKY<br>GANLFSTAKMEKMLGNDWYRYQVARRWKRDGYTWETLPKDVVPDLVRYFKGFRERHG*                                                                                                                                                                                                                                                                                                                                                                                                                                                                                                                                                                                                                                                                      |
| >scaffold_7_R12<br>23  | MVKVVRVAVVGAVFMASVDATSMKCGTTQATPLGAPMND CNPAYGGEIDPNCMPEVAITDAEGCEHAT<br>GPAMDEIIGSITGASAATRSLRRMEDASNSDVADLETYFGESLELSFTTLKEQYSSASVPTTPWPGSYWPTYQ<br>DGINVIWKTGDVSASEKYAIAFGDPTDFMKNISAKTGIDSRSSSTKCTADTDCYRNDGVSACKRKGVESGY<br>CVPTWYGICHAWAPAALLEAEPQCDVVKNNQTFHVLDIKALMTDVYDGSISTVFTGARFNGPDIPEEMDA<br>YGRYISAPRRDLGPGFFHIAITNILGKHKPFILDVTAGSQVWNQPVRSYQVQTMELVDANEASQKYFGVSP<br>YPFNSEMVFLAYVKTTSWIVEAYADGPLVSSGQVDAYTVSNDYQYVLELDANYAVIGGEWVEGSKTDHPD<br>FLWFPTKPDASTITSTGLSYAHVKELLELSLACGSSGGTSENASASTSTGGSTASISGSASSASKSTNESTSS<br>SNTYSNSASASSSDSSASAGSSASTSTSAASASTGTSETASASTSSASGSQTTSSSGYTSSASTSSGSTSS<br>NYVAPGSTGSGSTKTEAPSTAYPSSGTNEDGFLSMGSDGSPARSASGEESAAGQGSTPASGSAGTTDATST<br>YTSLTGSTVEDTGASLPSGKDALILTPSTSPSTTGEESTPATTAAPIGVGYTTPPTSDGQDLADVLDTTSPID<br>SRAAVTDEPSEGESTGTTALAHRS* |
| >scaffold_568_R<br>2   | MRLVIKTLVALAAVVLATSTEAAKAVQTGGDVNAVQSSHILTGENKRLRSEDEGNLLEDEENLLEDEE<br>RKGGANLFSSAKMEKMLGNDWYRYQVARRWKQYGYTWETLPKDVVPDLVRYFKGFRQRHG*                                                                                                                                                                                                                                                                                                                                                                                                                                                                                                                                                                                                                                                                     |
| >scaffold_81_R2<br>17  | MTVRDIVFLAAVLLVQAQALSVPTDSSTRILRSTVDTEDLDFEQRAGLAESVIKKATAALRPNVTPPELANW<br>LNKGKSVDDVFARLQLNKASDKILDNPQFATWLTYTDDFVKKNPNTETSAISTLTAHFGTEALTKMIQAACK<br>VDGTEAIAATKLEAAQIQKWLSSGKSADDIFILKLDQVDDSLASPFDANNYRKVFAQDNPTNLHKPSVR<br>VLEFVPEPLQQGPTS*                                                                                                                                                                                                                                                                                                                                                                                                                                                                                                                                                         |
| >scaffold_81_F2<br>24  | MHLQIALFLVVVSLVNVEAVPAKAQSDSVVSRFHIGRLLRDEREERGVSANAVETITDAVESKINTAQLKSW<br>LESGESADDVFKLLKLSAADKVLGHAKLDEWIEYMKLFNGQKSKTTLIKTLTAHFEDDGVARMIQKALQ<br>VDSTAKMAKRLQFEQIQRWLGHEKTPPEVLTLLKLDINRYDLFEKPELLTWVKYLLDDWNKMYPDRQTTLFA<br>RISPLLEEGILANLLIKAKSVASTEKIALRIQAEQTASWLKAEKTPDDLFTLLRLNRAEDSPLENPIFDAWVKYA<br>DDFREMYPKVSFDPIATISEHYTAAQVATMIVEASKSPSTSSIAHRLNTEQFRDWLNTRQSPVRVFKLLKLE<br>AGDKLFQSPVITWLNATFYNTKREKVSITLLRKRFGDEVLAGILTEAQQVPATKEATKLLTSLVGRWPKS<br>RVHPDNVYKWLVRVQGREKTDGFRFLFYERYAAAYKAARNG*                                                                                                                                                                                                                                                                                          |
| >scaffold_37_R1<br>044 | MRVASLVLLAAVTLASREVVCATTNTLAKADTDTINAIPIDARPLRNLKKTSSVGYDAEERAAEELVDV<br>ELLDKVISDHAYAKQVFLSWLQNGQTSQDIENRLETGLVQDKYKVVVTQYAHYLTLEERSA*                                                                                                                                                                                                                                                                                                                                                                                                                                                                                                                                                                                                                                                                   |
| >scaffold_18_R1<br>184 | MRFSFIVLLAAISSLVTTSHALPALPHEQSTVSKVSSNPDQSDTGAQPSERRFLRSAGVSGKMLKSESFKDAK<br>FAEWLQKQLSSFTVFESKLGLEKRYGLYDEYAKLHKASGQYP*                                                                                                                                                                                                                                                                                                                                                                                                                                                                                                                                                                                                                                                                                  |
| >scaffold_175_F        | MWRLSCWAMAETLSVPSLVCSFAVPAVLELPSEVPAAVIVRGRSQVCLRGHRRHRHRRHLRWNCCSSLR                                                                                                                                                                                                                                                                                                                                                                                                                                                                                                                                                                                                                                                                                                                                     |

|                        |                                                                                                                                                                                                                                                                                                                                                                                                                                                                                                                                                                           |
|------------------------|---------------------------------------------------------------------------------------------------------------------------------------------------------------------------------------------------------------------------------------------------------------------------------------------------------------------------------------------------------------------------------------------------------------------------------------------------------------------------------------------------------------------------------------------------------------------------|
| 27                     | RLRHPFRLRRASLVVLVESSLPS*                                                                                                                                                                                                                                                                                                                                                                                                                                                                                                                                                  |
| >scaffold_13_F2<br>21  | MTALSAWCTAVNSVDAGKCCLLVLMLYCAAQRLVNPSQLLPTGVMGVCRLHRWNHWISRRDRTLQASDT<br>LQDAAYATGVSACEVTKLCELLSSGRSRGDAGSRLCPV*                                                                                                                                                                                                                                                                                                                                                                                                                                                          |
| >scaffold_81_R2<br>28  | MRVHSLVLLAIAIISATDAVAAQSLPEEQNVSRFLRTNKAKETDSEERVNLAGFELKIGFVDDIIEKMHLSPTEFK<br>ELLANKGDAKKAFKAFHVDDVADDVFQSAQWKEWAEYVYKAVKKNENADEALAAAMSVAYNPDGSLK<br>LAKAAQNPNTKDIATVLENARQSSWINGGFTPGAIFKTLNLDKADDIFDTPAFATWTNFKAYNEKHPKKA<br>MTEFEVFSVYQKQKFAKLLASADDGKYAQAMKKELVQSWIDDGVHPTNMFALIKLDKVDLLTNPVNL<br>WVRYMKEFNELYPKQATTMIKFTQSYGDEKVALMIQEAAKSSDEKVVFAKNLQTAQINQWMVDKKT<br>EMLTVLGINSQTLTENPLGNVWRAYNKEYTKKMANGDFAFQP*                                                                                                                                                 |
| >scaffold_50_F1<br>228 | MRLTCILLMTAAALVGLDASAATTGNSVVANAAMVISPLAPESQGRSLRLVYDDEDDSADEKDEEEESA<br>DEVDEERGWFSDKVALTSLASKFVGKSTDEMGEVIKGLTPAQINTMFESGEDSIQQLPGFKTGMDFTKFDE<br>LVQKLPQEQQALVMSAYTKYLHNNKIL*                                                                                                                                                                                                                                                                                                                                                                                          |
| >scaffold_38_R2<br>61  | MRHNFAKVLVAIAFVVTCSAEAEYHTTKSDPLALTLSLRGGVPRTRSLRSDKYAGNEERAAGTSAVESLVKAT<br>TNVDDVETWLRGDTTNKVFALKLQKAGDNLDPQLPTLMRYLRFNEANPTKKTSLLATLTHYGNHG<br>LTKIIEAGLASTSKKTVATAKHLQTEQIQYWMARGRSPESVFGVLKLDKLLPFTWISSDLFEKPLKTWIRYLD<br>EFNAENPKQKTTLISILSKRYNDKTLANMLIAANKAESTSSIAKRIQSEQLTQWLSKGGKPEDIFTLQLEKAGD<br>SLFQNPFPWIKYADDLRYSETDLATMSTLINHYSDEAVAKMIMAASEDPNTKMLAKRLQSELQKDWV<br>FSGQTPNDVFIMMNLDKLTKLENPLFDIYQYGLFVNKMSAKANWNPITALLRITYGSEKELSGILMAALK<br>QPSTKAMASKLLQIT*                                                                                            |
| >scaffold_13_R7<br>93  | MRLSQVLVIAAASLLFASDTIAVATSNQAKISKMAQSSPNQRLLSNKYSVKEEDESVDVFGKRGFATNDE<br>EDLEERSPLSNAIVAKLDDIAAGWGTTYKIAMGQSSVSEAKINALLAMRDAFISNNKKEKELARGMLMLAN<br>KS*                                                                                                                                                                                                                                                                                                                                                                                                                  |
| >scaffold_29_F7<br>71  | MRLALLFLLVIATLVATGNTLAVEHTEGKITSSDTLLQPTAISNPDTTQTRRLRTPESPNDGEERRLVNVDLAIK<br>DAVHEVRKLTWKLQFAVWVWGLKKSPTKLIQEWGMKYPYTS DPRWAKILAYKAFWVGKGLPKYP*                                                                                                                                                                                                                                                                                                                                                                                                                         |
| >scaffold_25_F1<br>705 | MQRMMSTPFFLMITTIGDAQGEVEVVMIPADNSPLIKSDNFSRNCGATRRTWATGVALPTSMSQTAPRA<br>AGGRAFPPIRRLRFQMICLNRSICSGVLPSASSIWISSILTSSVVALTSGRMAI*                                                                                                                                                                                                                                                                                                                                                                                                                                          |
| >scaffold_102_R<br>91  | MQQHLVFCVKVANFILSTVLFRRVALPATHADLNFQSQHEQQLRPLTSSVLDQTRA AVARGRHSQRLRRRRLG<br>WR*                                                                                                                                                                                                                                                                                                                                                                                                                                                                                         |
| >scaffold_83_R2<br>91  | MSFTIGVCLVLLQSEVHIICRTHKKFSKNSFVNFLVIAPKEGYGQPYGLHHTQVLRRLGRVLLRRGRERHF<br>YILDSN*                                                                                                                                                                                                                                                                                                                                                                                                                                                                                        |
| >scaffold_3_F32<br>92  | MRLTCILLVAVATLVGLDASAATTGNTVVANAAMVNSPLVPESQGRSLRLVYDDEDDSADEKDEEEES<br>ADEVDEERGWFDTKMALSSLASKFVGKSADEMGEVIKGLSPQQINTIFDSGESSIQKLLPGFKTGMEFDKFD<br>DLVRKLPQEQQGVVMSAYSKYLHNNGRFS*                                                                                                                                                                                                                                                                                                                                                                                        |
| >scaffold_81_F7<br>0   | MRLHCLLLAVALASVDASPLQLNQSSISKANGFLSKRMLRTAESSEDEEERMNMPGLDVTNNAISSTV<br>TKGKMKLWLAKGEDADDALKLFNLDNGIEKLRDATNFNTYASYVRQYNAQNPDPHEVSMIAAIAARYGDDE<br>AAKLLHTMRHASTQAVATKLSQEQVDLWMAAKTPKEVFALLKLNQNVDDLSSPALYSMDDFLNAYNR<br>QHKNQHTSLMKVVLGSYDNAKAKALQDGLSASTKSRAWELKERQFDDWIKAGIKPEN*                                                                                                                                                                                                                                                                                      |
| >scaffold_46_F8<br>62  | MVMILIFIILETGEGFVPDGDNRHYADTNSAQTLLKQTDIGEMREQGASGKEIIQKLVENSSTWETKTEFSKQ<br>KYLKQKQKQYMPRVRFRLCTAESLCRTYRLKNPAKICNLREDSLGQMLVYGNIFAGGQVLVVDTCMGLVTG<br>AIAERQGGSGRIICPYEQQPAADILRRFNFGTISSFCEQNGWIVANFLFKNR*                                                                                                                                                                                                                                                                                                                                                             |
| >scaffold_6_R31<br>68  | MRLAIKTLVALAAAILATSTEA AKAVQTGGDVHVQSSHILPGENKRLRSEHDEGKLEDEEEDDEEERKY<br>GANLFSKAKMEKMLGNDWYRYQVARRWKREGYTWEGLPSNVPAALIRYFKGFRERHG*                                                                                                                                                                                                                                                                                                                                                                                                                                      |
| >scaffold_93_R2<br>83  | MRSSFLVLLGATLLQSINSTSLAETHITSNVQLHSEDIVRRLRFAPEQVEERGLTVPKFQDIVNNQQLAWWLK<br>RGKTTDDVFALKLNLGSSIFENPKFVAVIKYVDDFNSKHNGISAIPTLSKQYGGDDVLAKMLQKARQDET<br>TKATATRLQTEQMGIWRSQGISDVTVFATFKLDEGIANLLANPGFNWARYLTFEFPNGKKTIFKTLDEHFSQ<br>NILSQLLIAAQKNPRTEKFATSLQNVQLQGFLERGESPTVVFKLLQLDKGADNLFANPQYKTLWLNATSFQKT<br>KSDAAPAPVIDTLTAHYTDISLVKMIATAKATEGTKNMATYVEKSLIGKWATDGKPTYVSKLLWASATDKKT<br>LEAVYLEQLIIHSTVKVSSNLQLEQISLWVGKKEPTDAVFKLLRLNKGSENVFKRPQFDTWLQFANKFKTQNP<br>EQSKSVFATLSAHYDDLPLATMIKTAKEDVNTKKIAEYVERGLLPKWAADGKAPAYVLNKLATDKQDKERVL<br>TLFMKEIRIVEDKITRAES* |
| >scaffold_118_R<br>15  | MQTRYRLLLLVLLAVFLASTRASGASLQETTATSENPRPDGPVPTRSLSRESGAVRLLSPSEERMVKEAIG<br>WLWHVVKMKLKIWFVLYRGTTEQVLEKLVVSKTDENYKYYARYFRYYVYKPNKMPKNAPTKTADAIMK                                                                                                                                                                                                                                                                                                                                                                                                                           |

|                        |                                                                                                                                                                                                                                                                                                                                                                                                                                                                                                                                                                                                                                                                                                                                                                 |
|------------------------|-----------------------------------------------------------------------------------------------------------------------------------------------------------------------------------------------------------------------------------------------------------------------------------------------------------------------------------------------------------------------------------------------------------------------------------------------------------------------------------------------------------------------------------------------------------------------------------------------------------------------------------------------------------------------------------------------------------------------------------------------------------------|
|                        | ARLQDWLDKNLSPPQVFKELGFSGTFASAQGHDPDYKYFEQYAKMWSDLQVRISSGHA*                                                                                                                                                                                                                                                                                                                                                                                                                                                                                                                                                                                                                                                                                                     |
| >scaffold_31_R7<br>46  | MAIFVACSTVATAESVALTLGDNEVRRRLRNQNIKAAGDLISKSKEATLTKVINIAKTANGDEAAARRAV<br>MLAAGAK*                                                                                                                                                                                                                                                                                                                                                                                                                                                                                                                                                                                                                                                                              |
| >scaffold_8_F29<br>12  | MIAPLFLIHCILLTVCRGRHPPFGLVVVVLQLEQRRRDVRAQVRNLRIHIVTAATNNNQRYAVLDNIISIN<br>ELTA*                                                                                                                                                                                                                                                                                                                                                                                                                                                                                                                                                                                                                                                                                |
| >scaffold_18_R6<br>89  | MSSSTGSQVPSSFLLGSLAGVPPFALIAGTHARPLRAVTVAASTNTPVVSVMNSPRSPFAATAISMVTA<br>FAGICALPAIRAGAVVRPASASLVRNGITIVRPFSPYFTSLRSKSIFAFLSVRKSTPSRNSSVQPEMTHASTQIVS<br>PNTFWNWKRQTPRTSSRNPPIPSTYSTGASRGLFPYCIHAVPATEYLAQLSSLMNFCSPSIITHAVGNPSSAS<br>TYCTASPPGSPCRCTSLTRANSVSVPLSPHFRRSCRCRNCSSASVACFSLTASRVSSKVRFTSLTRSSLERA<br>RRTRLRFLILFLRRLRRRACCNCFSGPSSLPVSGLSLSTNSASSPILSGSAASPSEIACCTSSFAGVVRLLPPS<br>APTPPVASCCAPSPDRASSRTRCSSLAGRCR*                                                                                                                                                                                                                                                                                                                                |
| >scaffold_3_F37<br>06  | MPRATSPSLVLLSLYNSIGLGELEPNRSWISVSVGIHAAQKLWWISARRDERVILARKLRPGSVRGLFAGAT<br>RLLGWVVVRVFGRRHGGGGFFLELPIFSRIVERILFRVGVSEVLLRGMILLVESMVLGDREVTLCRETGSSSA<br>NGHCRGCACCRGSRRLRVRWRERGLERWRVHSEMDSVLPET*                                                                                                                                                                                                                                                                                                                                                                                                                                                                                                                                                             |
| >scaffold_2_F13<br>82  | MRFFWVLLTVIIVLAGVDTCTARGQSKLSSDFVRPFVKNAANTQLESKATRLLRDVTKYDNDEERAILPS<br>GLSNMISNVKKWFSNFISKIKLSFGEKRLNAWLKQKGTPEVFEILNLHKGTKGLLANKNLRTWSVFMTRY<br>NRKNPTKMVNMLGLTLTKYYGNEAVVLEVSQRGKTRPLANRLQTQQLHGWARNGLNTDVFNLLRVGE<br>GSVKTLAQNRALNVVYFRQMNMFYKNGWEAELTKLLTVYDDIPMAKAFAVAKTDPGTYISSQLQRFQ<br>FKKWLADKVEPATLLEKLMKDKTKLSFEPTVEVYVAYSSFYKAYSKTVR*                                                                                                                                                                                                                                                                                                                                                                                                            |
| >scaffold_60_F7<br>08  | MSWMICWICLVTKTISLMQCIRDQCRLHELERTRNLRQLSFKLVALKSSTDFFRHYLRCSHDPLLFGAPK<br>Y*                                                                                                                                                                                                                                                                                                                                                                                                                                                                                                                                                                                                                                                                                    |
| >scaffold_24_F1<br>319 | MRLSFIFLLAVTFSSLVATSHALPHEQSTVLKVAATNPDQSVAEQTSQKRFLRSAGLGSQMLKSESFKKSKF<br>DELLDDNVSSFTFFVDMLKSKKKYRDLYDEYAAIRKARGAYP*                                                                                                                                                                                                                                                                                                                                                                                                                                                                                                                                                                                                                                         |
| >scaffold_18_F2<br>148 | MRPNLVVLAALVSRCTAVSAASTNQINLSESNQALDTLQNHAGDGNRFLRSANIVDDSVDDIDSDDDI<br>DNDDEERGGKTWAQKFAKWHARGETADDVYKRFKLEPFVRYAYKHRQIGMLKENEYRKYWSITWPS*                                                                                                                                                                                                                                                                                                                                                                                                                                                                                                                                                                                                                     |
| >scaffold_5_R12<br>81  | MQFTYVLLLALCIAITASAQVQDNEYQAVVSPFAKRSLSVDTGTESDDEEERGIIPSSLKDIVKKGTSKVS<br>SLLRKYKSLQKAGRTDDDIYKLVWRQRKNTDQIYTRWIRLGKSEEVSQLFLKHGLNAEVLYNLSRQKGSMD<br>DIYSLWKKLLEPGQIYNIWLKSKTDDQIFSAWYKAKMPEDIGHVLRGKDPNTRKRVPFWEKYSEFYRAK<br>KYRTS*                                                                                                                                                                                                                                                                                                                                                                                                                                                                                                                           |
| >scaffold_81_R2<br>13  | MHVRLFLPVLVLLVGSDDTSADKSVPTTRLLRSQKLLQITTKSECESTSDPSTTSSKTGSLNRGYP<br>RSDPTK<br>HDTNESNILFYLMK*                                                                                                                                                                                                                                                                                                                                                                                                                                                                                                                                                                                                                                                                 |
| >scaffold_7_R22<br>62  | MRLHRTLLAPIAVFLAWNCFDPTTNAQVVAQDLSDKAFANTNALRSLRSQKSTSEDDPIINEETRNTMYT<br>QLFPAWYAAGKTPEDAFEELKNPSTGDENWPIYKNYKMYDYTYKTMG*                                                                                                                                                                                                                                                                                                                                                                                                                                                                                                                                                                                                                                      |
| >scaffold_39_R4<br>58  | MRTPSFLVLAALLVNADAASSRHLANPNVQNLAHVNDNWLDTKRFLRVHVEGEERGISAPSVKMLQGW<br>VERGLISDEAVKLISLGDKADDLLSASLLNAWFSYVVKFNKENPSDKMNMIKTLTARFGDEALSTMIETAKRS<br>SKTSAMAELQAKQLANWAALKKNPDDIFALLHLNSAKSLLFDQPSVNSWLKYMDDFTLKSSSVEFSAISTLR<br>KYYNDETAEEMIIVALKSSKTSEAAKRVETELLRTWLNSMKSSTDVRRLLNLSTAPQSELSIWRNYVALLNKV<br>DPKFKTEMLQAVVKKGLITDDTFRLLTLGNAADDLLNGSLLSAWATYIKVFNQNPTEQLNLIIVLTARFGD<br>EAVSTMLEAAKVPYHTIANRVQTEQMKLWLDAGKLPDHIFVALKLNVTVKLFDQPLNTWVVYLDEFN<br>KANPNSKTTLFSTLQTRYSEATLAKMLLVAKQPNLES LAVRIQGEQLQFWIKANRRRPGDIFKMLRLNILGSD<br>LMRNQLFTAWVQYTDDEFKLNPGTKLTTLATLRKYYSDETLVTLFLKASQSPNTAKMGKRMESEMLREWFS<br>AGTKPTHVPVGFALLNLGRTGTVFESPLYNVWNTNYVGFMMKAGAFRGDTITLLRGIYGDES LAKVLIAGK<br>VQSTKNVANTLEKELFALWKAARVHPTQIHKLLRVENVSRSNPIYKFGDYVLAYTRA* |
| >scaffold_129_R<br>17  | MRLSFVLLAAAVSSLVATGHALPHEQPTVSKVTATNPDQSVTEGQTSEKRFLRSAGIGRQMLKSDSFKKTK<br>FDEWLADNLSFTVFIDKLGKKEKYSLSYNEAALHKASGQYP*                                                                                                                                                                                                                                                                                                                                                                                                                                                                                                                                                                                                                                           |
| >scaffold_73_R2<br>12  | MRLLYLAGVAILSFAADATGAKVLVSDDSNHNGAQAASAVVSTTRLLRARSVIDEERAGGISASADKLAKL<br>FKSSKVTAVAQQGENCGKCLLSHESREHSLEYGI*                                                                                                                                                                                                                                                                                                                                                                                                                                                                                                                                                                                                                                                  |
| >scaffold_46_F1<br>215 | MRLSQALVIAAATLLASDTVAVATSNAQAKISKMVQSTPSQRLLRGNKYPIYEEDESEDSVDLEERGFATPD<br>EEEEERSPLSISQVKKLEGYARRWHTTEKVALGRSSISEDKVQALLALRNAYISGVKSEKNAAKMLILRAN<br>S*                                                                                                                                                                                                                                                                                                                                                                                                                                                                                                                                                                                                       |
| >scaffold_15_R1<br>282 | MRLSQVLVITVASLLFASDTVAVATSNAQANLAISKMAPSQRLLRSNKYPIKEEEDSEDSIDVQERDFTAH<br>DEEDLEERSPLSDAVVKKLNTIANGWGTSYSSVAMGRSSISQAKASALLALRDAYVSGDRGAKAAAKMAILR                                                                                                                                                                                                                                                                                                                                                                                                                                                                                                                                                                                                             |

|                        |                                                                                                                                                                                                                                                                                        |
|------------------------|----------------------------------------------------------------------------------------------------------------------------------------------------------------------------------------------------------------------------------------------------------------------------------------|
|                        | ANKK*                                                                                                                                                                                                                                                                                  |
| >scaffold_77_F1<br>29  | MRLSYIFAVVVLVAILQSSGTAHPVYEDSKQIVSAGAGDATKVDSGRLLRGVEEKMEAEDEERLFKNLGTYLKKI<br>PQKIKDSWEVKKAKEQLERSRNRKWIREQNAVPTS*                                                                                                                                                                    |
| >scaffold_244_R<br>1   | MRLTFVLLAVAASVLRTRTDATPATYGEVSTSTIESPNRSALKNMAETLKERRLRRPRCPSTIYRKKSAQTFSETR<br>CSGPACPQSLSRGPSR*                                                                                                                                                                                      |
| >scaffold_5_R34<br>48  | MMRWRLFILHALMATLTLPSSCWTVQILTRGPRTRKLRCLSTLPRRDNTEVFDCLYEGNATLQRRRIATVTW<br>RRKKLVMLKL*                                                                                                                                                                                                |
| >scaffold_107_F<br>161 | MRVLSLVTLFTFVSAQLAAVNADRTGIAAADLNTALLQRVLVGVEKRTLRYPDPERDSEGDADSDDEDEERI<br>ITIPGIEKLDDAVSKVTKTDDMVSKAAKASTKWKALIQKNINELAETGKLVKTLKANVLYKDVELEKMSLQGLR<br>QLDDIEQLRKVDIENKVKGTTPDGMRRKMEHTANMKLPPAQFLESHIGRDAQLVGESGQRLLSAAVVSK<br>GDDVHGKVLIISSNPKKGFLLPKGGWDDGEAIEKAVLREVIEEGGVKSQLI |
| >scaffold_10_F2<br>271 | MRLSVILLVAAFVAALDPATAANDANTVVAATNVHESIAIARFLARDEDDYPVKGERDEDDSDNDKEKDE<br>ERMFSFFQEKAAALTEKATALSFAFKLVSQSGDDLVTAVSGLSKSEFVALFNQQAAMAKMVPGFPRGMSL<br>DEFETVVRSAGLSDDLLENALMVGYGKYLALHMPK*                                                                                               |
| >scaffold_73_F3<br>95  | MRFGFLLAAIALFGLCESTVLNTQQKRNLRLSTTNDNEERAIGNISKVDDVADDASKNFAFMINMFKEWDE<br>LSQAQIARMFKQTPDEFAAMWIMYKVYQKLGADDLIKTLKAKAK*                                                                                                                                                               |
| >scaffold_6_F17<br>3   | MRLFIKTLVALAVAFLATSTEAAKAVQTGGNVDDVQSSHIVPENKRLRSEDEGNLLEDDEENLLEDDEEE<br>RKGGLNLFSTAKMEKMLGNDWYKYQVARRWKRDGHTWEHLPQHVPADLVRYFKGFRERHG*                                                                                                                                                |
| >scaffold_52_R9<br>85  | MRFALLVAAVSLIASGDALSTQADATSRHLRSHHTNTYDAEEEERGLDKSIVKSLPEQFKNMYKPSNM<br>ENVLESWRTGLQSVDDAVMYMKSGLMDFDAISHFVDAYRKHINKKGLPY*                                                                                                                                                             |
| >scaffold_78_F7<br>7   | MHFISFIAVALPFNVLAEEELAWELDCSVPLGFGPGLRLGVDFDRAVTFEFAIGFSFELDFLEWPRCWRRLVLL<br>GHLSSNLRCWRVSSLRCVLPGRRLRRSFTSAEIAICIGEPGYTS*                                                                                                                                                            |
| >scaffold_26_F3<br>00  | MEAQGLFACLLWIRSVFPAGRATVFGDSTIVINQALMLNRCQAPSLRPWVGAIKALGTGRPAFYLQHVRRRA<br>YNTASDALCNWMMDTLPASDVILRVPSGLVRHRTRRLRALPR*                                                                                                                                                                |
| >scaffold_431_R<br>1   | MKIQLLHLHVLFLVQSLDVLHVLRYGYYHAILREVHPVPLGLLPDANNHSLQRPLREILVTRISINRTGRPENHYL<br>AQRRLRLQL*                                                                                                                                                                                             |
| >scaffold_6_F13<br>9   | MPLPVAVLAELEWLDTVSLYHVCTWSTAIERQQVRPNQFVRSVGLRSLRWCRRLHCKLRFHIAPVRRQT<br>SVAIPYPLSCQLLSCSCQCFAPGIYCCLLRYSREFVRIPVHEDHFSLSIVLYHRHTAEIAFNHASSYCWLLDHV<br>KRGVLMHPCKTKEILVTMREFEAVKEIRKVECEVG*                                                                                            |
| >scaffold_30_R7<br>9   | MRLKSLKVLALSACANRVTLQFSPAGTCASAVSALKHYGRAPARVPFVGHPLRHCKCFESRQRRPQQRKLR<br>KTRLKWRMSSDINLE*                                                                                                                                                                                            |
| >scaffold_11_F1<br>229 | MKIYTVGAMLFVAATVSYALESRQLRSQQQTGARIVAGDGEETAGDDWNVLLSDRKRGAQAGTLVRD<br>SGKDEERLVADSRRTQTYPPVQ*                                                                                                                                                                                         |
| >scaffold_10_R2<br>236 | MALGTVVVAHTLTFTHASSACLHFGCPAVKRTAVEDFDSRYSGASTSPPRVLRALRRKRAKREISYGVWRL<br>HQMTAHTRGMRWSTGFCGSPPLLVPHLVFLATYVIRCSSAPKPSKR*                                                                                                                                                             |
| >scaffold_29_F6<br>61  | MRLNCFVVAALVASTNAAASSIQNHVSQTTPDIQAATQTDVVKRSLRYVKDEEDSIDTKDEERVQGI<br>NVKELNKILSAKRIEIPANIEALSKAQRDLVHTFKGQDLTKKMFATKLGMRDVEDVANRHYPPFEKWEHLF<br>RPGKKEKVPPEMLIGNHEYYY*                                                                                                               |
| >scaffold_46_R9<br>61  | MRLAHLFVLAATFLVSSGALAATNTDSVIKTDVYKGSKPATHRALRKYKADFEDDDDDDDDEEERGIKDI<br>PLERLQSLGRKVGVSADDVLSDAAGVMRTMSESIKQWTKGLNKLKQLYKKAKSPRISDY*                                                                                                                                                 |
| >scaffold_46_R7<br>83  | MRSFVLLVAVVALLFRIDAASGSSMKLRSGQLIPSTETRETEQIGRVLRGEAESDPESEERGITDLAKLLGK<br>SKTMFDNNALATIVRLKSQFATADDAVQAFMTRNINPDVAVYKWLKLYKANNQVVKKTGDAPEYLLWIRY<br>AKEYKDAHPKWVSKLPKGA*                                                                                                             |
| >scaffold_29_F6<br>55  | MRLAYVVVVAVVALFASQDAVSAEADVQLGNLNVNSESTTRFLRVESTIEAEDEERALPSSLTKISEKLPVG<br>DKVKPLTNKVAPLTKLTDKTMIAVRLKPIADFTGKLPKPIADKLMPIKPFKAAKLSAPVVQKIEKFKTFAEK<br>IKNYKVGHTLSERYTMAKFENWFKQNKSPDDVKTLLKVGEGATVNTKNYDLSVQYNAFFQWATRDKEM<br>KAKKAAAAATA*                                           |
| >scaffold_710_F<br>2   | MRLTYITIVATAAILACCDGKSAVGDSPKPLAVPQSHVQTGNANRFLRVHDDEEERIGTQFITSLSDFASAA<br>DKLTRSKSLNSISKVDDIAPGRAGKTLGEVLKIDDVAYLKAAGKWSKNLDDVEDAKLVSELSKLDHKEALRVLD<br>EKNAAAFKSIEDMGYSPDGMFKMKELGKDYFDPFLKHYTRYWMAKHPTWTSSL*                                                                       |
| >scaffold_2_F16<br>79  | MRISTLSLLLATVAVVLSCLASKGEDPSQSIANVDNIRGAGRFLRAQAQVDEERVNLKLSPESEKWLGLAG<br>KSAAELEKAAQAPKNVNPEKLLAMMKANAEHFMMNLAKSGVTPKIMRKEYNIKRMKRVLSKDALMRNAN                                                                                                                                       |

|                    |                                                                                                                                                                                                                                                      |
|--------------------|------------------------------------------------------------------------------------------------------------------------------------------------------------------------------------------------------------------------------------------------------|
|                    | YQEYERFKEFWNKLPKKLRFLAKAASLH*                                                                                                                                                                                                                        |
| >scaffold_225_R6   | MVFSVFFSAILLSVSASFNYNVNLETPRVQYRGWPTTWFRSPIAKILWERYLRNLADSIDIPLNPDIRGWHMS<br>NPPLEVCNRYLLIYPFVEQRIVHSLGQFCSAGDLLRFV*                                                                                                                                 |
| >scaffold_237_R14  | MQRRMSTPFFLMITTIGDAQGEVWVMPADNSPLIKSDNFSRNCGATRRTWAIGVALPTSMSQTAPRP<br>AGGRAFPFPIRRLRFQMICLKRSICSGVLPSSASSIWISSILTSSVVALTSGSMAI*                                                                                                                     |
| >scaffold_614_F1   | MAFSSFLKFLAMATLLMVQVNAEPSQQTRNLRIQSDDLPEQARRLGNWKALIINVKNNPGVSDGVVNL<br>LKKADFVTGTSSKIKIEKVKDTAGKVKDKVTGK*                                                                                                                                           |
| >scaffold_44_R818  | MRFSYVLLVAATALLATANAIEADPTSRSLRAHKSHEKSQDEERAFTYTFNFSLWDDLFNLSLPEQFQRMKE<br>PWYLRRIFRSWRSGMGTSDEAVAFMKSQGLSQKAIQFEDAFLKYRAHKLAKGK*                                                                                                                   |
| >scaffold_29_F663  | MRFLNILLIIAAVLTAAVSASEDAKPIQIKGANNPNEVSAHRLRAHKSDELDAEERVIPDVYHLSKLEKVAIYP<br>KIVGWRLRKFVNAAMADLGMAREVGTKNMAIRWYQKIVKNGGFKHTPKGKYITQRK*                                                                                                              |
| >scaffold_111_R171 | MDSTASTAVLIAMTALVDAQRLRSEASTATDSTVSTADFSTLSSGSGFTPGNVEAQSNGFALDKEGSTGGN<br>RPSGSMQGGAGRGFGGSGHNGMQNVGSGEGLAHGSGSFGGHHGGFGRHGGHGRDEGSFSGGDFAGSF<br>GGHDFGGSGFGGNFDRSNGEMPSIGSGEVPTSGSGEAPTAATTTSSSTSSVTASSA*                                          |
| >scaffold_443_F6   | MRLSVILLVVAAFVAALSPTAAASEANTVAVPNVHESIATGRFLRARPEDDYPVNDERDEDDSDDDKEKDE<br>ERMFSFFQEKKTALKAFKLVSESDDDLVMAVSALSKEEFVALFNQQAAMAKMVPGFRPGMSLDEFETV<br>VGRAGLRDMEDALMVGYGKYPAYVM*                                                                        |
| >scaffold_29_R1159 | MFPRLYAIALIVVALISTCGGTRMDEKQPLALLTTRSSRHLRSIDDRPRDTKTEERGNIDIMISDAAKKVKKAT<br>WWKVKFAVWKHLRDKDPHDVGRILGMRNMGREALQHKNDLAAFWNFYGGKPLKYD*                                                                                                               |
| >scaffold_52_R3    | MRICFALLAVTALTAVVSGSVNLRASQKIQSGDVAQYKTSGRELRGDLNTDEAAEERVNFGFLKPDPLKSF<br>AKQQMKYAYNERIFNDLLKFDPPDALYTTLNLSKMKNL*                                                                                                                                   |
| >scaffold_57_R893  | MAFSSFLKILAMITLITFQVNAETSQRARNLRIQDDDFPQEQARRLGGNWKAILINVKNNPGVSDGVVNLIK<br>KVDFVSGTSKKIKIEKVKDAKDKVKDATEKVKDKLTGN*                                                                                                                                  |
| >scaffold_592_F19  | MRLNLVLLAAVIALVSRCTAVSAAASSTNQINLSNLNQLNMQNHAGDGNRFLRSKIVNDDIDSDDDID                                                                                                                                                                                 |
| >scaffold_73_R384  | MRLSYIVLVVAVSFAYCEGASSVSDSERLAVPQSRVQAEQNSNRFLRVHQDDEERAGVEKILTQSASKLKRT<br>VSNVDEGLISKLWSIRKDNDAFHFIETVMRLDPDGMMLLRMRDQGNIDLKLLKHFTKYWAEKYPDWVSKL<br>P*                                                                                             |
| >scaffold_18_R458  | MRLSLVLLAAVIALVSRCTAVSAAASSNQINLSESNQVLDTMQDHAGDVNRFLRSANMVDDSDVDDIDSGD<br>AIDDEERGKTLTFAWWNALGKTADDIYKYNLKLPLVRDAYKYNQVVGELKNNKNYQKWAAYSAYLKDRGL<br>N*                                                                                              |
| >scaffold_16_F1314 | MSLLLSWRSLSLCLLSLNVSVLCLHGFIVDFTRCLRLLWFFGHCCFSGRHLRFLSCLNRSFLVHVLNVNF<br>NLRFLNCSLHFFHRLNFSFRVNLVRFSGLLDLRFLVNCIRLHPFRKWESEGFQPVVKVFKHRLPFRIVEKRVEISV<br>EHLKLLVTGRQSVVKDLRQFQTRDLVVRHHHEHRQFA*                                                     |
| >scaffold_63_F287  | MKLCHIVALTVALLVACVDPASASKSKLATQGDNIPTKRLLRTTEDEERGISVSLGLEKISNAFTSGKTEKFN<br>LVKAGQSADDSFANLGLGHVNLFEKGGEVRTKMVAKFFTSDFKAWSKYTHKMNQKQDADSAMLGLTRA<br>YGEKNAAVIILLGKDSLSSHTVAKKLETAQFTKWYTVDKIPNADELVKKVLDVPRSKLRKYPREMSIWDNYSK<br>FVGKYVLNPRPGPPVRK* |
| >scaffold_25_F1242 | MRLSFLLPVAMIAIYCATCNANVASNQKLSMLQARLNDEAGGTRLLRVHHEEEEEADREERGLTDLFKTEK<br>AAVKKMAKAIMADPSKADDVYQKWADKGYTLTQLSDFLKSCTRGRKYDRVYNGYMYRDIYV*                                                                                                            |
| >scaffold_12_F708  | MRALKLLLVTVLLVSLDATSGYNKLQGTNTEVVDGTQRGVNSERLLRGHPSTVDKVSADDEERASLPTFLKK<br>STSGATNWLKDKKLAALKLRALPMNLKSVQKTMKDGDIPDRVFTLLNLQKSNRKNINGFRTGEYNLWKE<br>LTVEWTKTYPNWVSNISKKPK*                                                                          |
| >scaffold_25_R673  | MRLSFLLPVAMAAIYCATCNATADSDQNKVSMVQSLDARLNGQADGTRFLRAHHEEEEESDREERGLTDL<br>FKTEKAAVKKMAKAIMADPSKADDVYQKWADKGYTLTQLSDFLKSCTRGRKYDRVYNGYAIHLDY*                                                                                                         |
| >scaffold_74_F614  | MAGRLCVMAITITLVAASVTPSQSLLTERQENDTSGRFLRVASTLKEENDEERAAAPVEAVTSLIKNKNVA<br>NAAVEAVEKKYPLVIPGVTDLLIKARMKRWFWRKTLPTKVFKLGLRGHSEDRLKNHPFRKFYAAYLEKWKD<br>AQAHNLVDWKGKAPALPGTITTTGNTVLKT*                                                                |
| >scaffold_1_F5431  | MKTATAFATVLALIVATNGAHVSPNTPTRLRGLRPTADTPSVEDDKEDRKHDDHHVKKVKKIAIPVVPVPEVPO<br>YIPVPSVSPSTVVASSNNA                                                                                                                                                    |
| >scaffold_37_F302  | MALKIATLLSCLSLWLLFAETFYWKETLSLEVSFAFRPQTSLACVDSTPSNRRSTYRRWLRVNVPWQRLRTQS<br>QCETVQADAQSRFSILGFCMEPTAIWSG*                                                                                                                                           |



|                        |                                                                                                                                                                                                                                                                                                                                                                                                                                                                                                                           |
|------------------------|---------------------------------------------------------------------------------------------------------------------------------------------------------------------------------------------------------------------------------------------------------------------------------------------------------------------------------------------------------------------------------------------------------------------------------------------------------------------------------------------------------------------------|
|                        | RARPTERNFWLGSHPYRYHMKPQHFFMNRQMDRFPVNLPLILPRARQRQHRYFVGV*                                                                                                                                                                                                                                                                                                                                                                                                                                                                 |
| >scaffold_29_F1<br>478 | MRCILYIALALAAAFARSDAVEAFTNADLSSKISHDFAANELVNESSQKRFLRVDPKSVSDTEERMKISSLKKIIKE<br>LDVKDAKAKKLAIAIKDLAKARKDAQKLATNVVSKAQRTTRTKFSSLEYDNFMRMFKSNLAPEKAKSTGKIKT<br>PEQFTRYEDFYETAKAADILTRMAHA*                                                                                                                                                                                                                                                                                                                                 |
| >scaffold_93_F1<br>27  | MRLHCIVVLAVIAFATNGNEVSAGKSRVAITTTGALDTPTRLLRQTDEERAFGLNLLPGSKISSFMTDKK<br>LSKYLKSNEQFDDVFIKLKDAGDKLFENPKFLAWAQYVDDFNQKHQTQNSMLPTLVRQFGDDLSIMLE<br>KAKQADKTYGVALRLQGEQMKLWRREGLTTDMLFKIYKLLDDGATNLLNPGIKIWMRYADELFPGDSTLLF<br>KKLQKTYSDAALSILINGKTVASSEYGEVGDGFAASSLAEGPCASGESFPVAVTQQGGRCVW*                                                                                                                                                                                                                              |
| >scaffold_13_F2<br>760 | MLVERDLLATEASQTDLLLLLLLLLGEPRRVCNFHWCSFTLLRCRLLRRCTCITSTRLLLVLTSLRWFLRLLW<br>SL*                                                                                                                                                                                                                                                                                                                                                                                                                                          |
| >scaffold_8_F32<br>13  | MCLQSIFCGAAVLCGEWLVIKRAFAVKCRLRSHSLPPAHAALSRGVLPRHLKCLLRYSSVSTKWHLYRVVQRR<br>RWRNLRHQSRILFLVRLPLCQDKSPRDNHQFLVQVWDSIPLRWFGSRSQTTPL*                                                                                                                                                                                                                                                                                                                                                                                       |
| >scaffold_18_R4<br>28  | MIHICTFILLLSGERDFGVNLNKPFPNNHPLDLPFFSGNHADLLIVCLHKIIVSGYEKLSVYNCFLTIICNISPYC<br>KKNLMVSAVRLRLFLKFAQTRYLFDNEANHHLVFFLETFDNIQYQYEGNQVYAMIQNKNVFYQLNDL<br>QLPPIRASTEGKKEATEKTEEEKATDGEFVPTVEWLSAWKKKLPSTSLRLLQYLIPQLEDACKKAGGSLDEDA<br>MLYFLRTTMMVGLLPVPHPIVIRKYQINQFTHLWFTFTWGVIFLRNQVLPFDGGAITLFTISVL*                                                                                                                                                                                                                     |
| >scaffold_8_R13<br>70  | MRLSFVLLAVAVSSLVATGHALPHEQPTVSKVTAANLDQSVTEGQTSEKRFRLSAAGIGRQMLRSESFKKT<br>KFGEWLKDNLSSFTIFVDKLGKKEKYRRLYNEAALRKASGQYP*                                                                                                                                                                                                                                                                                                                                                                                                   |
| >scaffold_2_F23<br>3   | MMGSVSAFVVWLKSLNLPPTTCTCSCPCDVQTCYRRELLLLLPVRACLRRLRLLRLLVPRRLEWDLRFLR<br>ADLDLDS*                                                                                                                                                                                                                                                                                                                                                                                                                                        |
| >scaffold_4_R23<br>6   | MRLTFLPVPTMAAIYCATCNATAVSDQGKTPTVHSLDARLNDTGDRRSLRAFKEKEEFDTEERGFLEKAAV<br>KKVQGGNYERP*                                                                                                                                                                                                                                                                                                                                                                                                                                   |
| >scaffold_29_R9<br>03  | MRLASILLVSALLCGSVFSTEGKQAHTVKNTDGRLLRSDDYDEERGFNWPWLKIKQLDETTAIKQLATDF<br>ADLKSINREALDVFHLMREGGMSPKKATYISNLFKAYMENPRLYH*                                                                                                                                                                                                                                                                                                                                                                                                  |
| >scaffold_50_R4<br>62  | MRFSYFLLLSAAILSNSNATATVSGEGHVMSTADAPARALETNNGKRSRYAADEDDKYDQKNGKYDDD<br>EEEERNFTAQAQLAKWTEKAESWVSKNRTPAYIKDKLTGMNGLMTAENRKKYELFTAAYGRANPHALDRL*                                                                                                                                                                                                                                                                                                                                                                           |
| >scaffold_25_F4<br>87  | MRPILLHAEFWTLWLVLAWKACCLREPSGLAFTTTYWSMTKTSYRLTWITSFASTRLSLLRMTTTRRRLRLL<br>HLLQQTPRMYPYLYLKRMRVKRALYRWLQLTGCASTDASARFS*                                                                                                                                                                                                                                                                                                                                                                                                  |
| >scaffold_7_F31<br>0   | MRSLLALAHHLILCLLPHPAYFHTLMSASRPLDTSMGLGFWLLPSSTSVRSKIQSVWAGDGGTRPLRSILIADS<br>TPPPPEAATLPGDE*                                                                                                                                                                                                                                                                                                                                                                                                                             |
| >scaffold_50_R8<br>12  | MRLTYILAVAVVATLHSSATAFSSVKDSNAADSALAEGGRMLRGEYGNDAIADDDAGKKKVSYGDDALDY<br>DDLDDDDLDYFEEERTLGDVLKLNLPVRAVKSAEKTEHAAKVKEALKDAADYQAMIARAKEMVNKD*                                                                                                                                                                                                                                                                                                                                                                             |
| >scaffold_30_R3<br>24  | MGVWVLLLLDVALVAATSSVRTALFSLPVELCSFVFLTDAGRGLRPEASLVLAGDAVRGPWSKFCDFGAK<br>LDSTVRGGNGPL*                                                                                                                                                                                                                                                                                                                                                                                                                                   |
| >scaffold_111_F<br>98  | MKVFSILASAAVLIVMTVLVDAQRRLRSEASTATDSTVSTADFWTLSSGSGFTPGNVEAQSNFGALDKEGST<br>GGNRPSGVSQGGAGRGFGSGHNGMQNVGSGEGLAHGSGSFGGGGGFRHGGHGRGEGSFGGDF<br>GSFGGHDIGGGNFGSGNGEMPSIGSVAVPTTSGGGAPVAATTTSTSSVAASSA*                                                                                                                                                                                                                                                                                                                      |
| >scaffold_25_R8<br>04  | MRLTQVLVIAVASLLFARDTVIATSNQAKISKMEQSTPSQRLLRSNKYPIEEEEDEFEDTMDFEEDYTTTDE<br>DLEERSPLSAAVAKLDDIASGWGTSWARVAMGQSSISEDKIKALLALRDAYISGSKKAKQAARMAVLRANN<br>S*                                                                                                                                                                                                                                                                                                                                                                 |
| >scaffold_81_F2<br>85  | MRLNCIVLIAAVASLSTAAATSATTDIKPVRPAINLQPPPLVVGRLLRTVQDEERGFTLPGAGKLADLFESTALK<br>LTQSARINTWLAKGTSTDDAFIKLELNTAGSRIFENPKLLTWAVYVTKVEKKNPEEILARLSKQFTEGSLAKMI<br>ASAKLDSKTEGLATILQAQRQVWVDAGKSSDEVFKLLQLDEAGTKLFKNQQFSTWTSFVDAFNRYKPEEA<br>VSIFSKLAKTYDDFTLWKMLEAAKVPKTEIIASKLQAQQIDAWLDAGKSTDEVFNLLKLQRTGDKLFKNSQF<br>LTWVSVEKFNKDPDQAIAIFSCLAGIYDQVTLSSMLEAAKHVPSTKRIASYLQGGQNNQHWLADGKSTDDI<br>FKLLKLNTPSLENLIGPRLDAWTSFMRAFNMANEGKETTIALTLTHYKDRGLAQLLQEGTKFASTKIAEELQ<br>TAQFARWLQLGKTEEDIFALLKLLTPTTDPEAIVFYRYKLFMDAHM* |
| >scaffold_50_R1<br>069 | MIVSFKTLFVSAVAVALAVSVEGYSGAVESTYETKRMLRLEAQDVAEEEMADDSECGSLEMAEDDSECGSL<br>EMAEDDSECGSLEMAEESGTGDKGGDNGGNTWTQAPSTGDKGGDNGGNTWTQPPSTGDNGR*                                                                                                                                                                                                                                                                                                                                                                                 |
| >scaffold_29_F7<br>68  | MRLVSLFLVIIATLVATGNTLAVEHTEGKITSSDTLLQPTATFNPDVQTRRLRTPESPKDGEERRLVNLDIAIK<br>DAVHEVRKLTWKWLQFAVWKEIGKPKQLIQEWGMKYHM*                                                                                                                                                                                                                                                                                                                                                                                                     |
| >scaffold_10_R1        | MRLSVILLVVAFFVVALSPTAAASEANTVVAAPKLHESTATARFLRVRPEDDYPVKDERDGEDSDDDDKGNDE                                                                                                                                                                                                                                                                                                                                                                                                                                                 |

|                        |                                                                                                                                                                                                                                                                                                                                                                                                                                                                                                                                                                                                                                                                                                                         |
|------------------------|-------------------------------------------------------------------------------------------------------------------------------------------------------------------------------------------------------------------------------------------------------------------------------------------------------------------------------------------------------------------------------------------------------------------------------------------------------------------------------------------------------------------------------------------------------------------------------------------------------------------------------------------------------------------------------------------------------------------------|
| 133                    | ERMFSFLEKKTALSFAFKKLVSESGDDLVMVAVSSLSKAEFVALFNQGGQSAMAKLVPGRPGMSLDDFVTVVKS<br>AGLRRDMEDALMVGYGKYLAHLMD*                                                                                                                                                                                                                                                                                                                                                                                                                                                                                                                                                                                                                 |
| >scaffold_50_R9<br>34  | MHLLYLAVGVAISFAAGATDARVLASDDSNQYRAHAANANIVSTTRLLRARSVIDEERAGGISASASDKLAKL<br>FKSSKVTDEQLQQWLSKGGAAESVFNRMDLGNTRITKLFENTQFLRWLQYADDLSASGKGTSAISILSTQYG<br>DDTLKYMIESAKKTTNTKALGTRLQTEQLKHVVITIGKDPDEVFKLYGLNHVGSILSESQFSAWTKYVDDLN<br>AKNEGAFVSIPTLRKHFSDDDLFHIALAAKRVDKTKMGTKLEDAFVQFWIHRKETPDNVLVGLGKSAETL<br>LENPLLKILTKYTDAYNVKYAAKTTVIETLRTFGDDKVARMLQAGRTDSTKCKIAKQFQADQLEMWLNLSG<br>QSVDDVYKLLKPSRRDLLVDFGNQKLFDTWLTFMNAISIKHPEKTSIFTTLAPTFRDKPMMQILEAANKFP<br>SMEKAATKLQLEKAQSIFSTGISPYEAFKLAALDDVGDVLSLSPFKKWMLYVEDFNKKNPANKESWFLPLRG<br>NYQGDRLDEIHKAMKDPSTVKLAKSVERERMKEWLEKWEYSPSTAFRKLHLKTAGEKVFNSPNFELWVKYL<br>DDWNKAYPSNKMIDGFRDNYNDLNLVRLFTKAEKTPSSKKLASQLKDALADKWVAEKKTLDYVKSWSY<br>HVPSSDDMLDRFTKLNNA* |
| >scaffold_2_F36<br>47  | MRLFWTLLVGLATSGVQPIAALSKVADTSETSTLDHGQSTIIEGTARHLRLAPHEDTSITDVLVERGLKVHDE<br>ERGNFAAAAGWTANKAFNGLGKIVGHDNSNKLKTKVAEFFSILRKKGKTAGDIFAHARKQTDPSQRAKFET<br>VATMYQQYLTKVL*                                                                                                                                                                                                                                                                                                                                                                                                                                                                                                                                                  |
| >scaffold_644_F<br>7   | MAGRLCVVMAITITLVAATVTTPSQSLTERQESDTSGRFLRVSTLKEENDEERAVAPVEAVTSLIKNKNVA<br>NAAVEAVEKKYPLVIPGVTDLIIKARMQRWFWKRTLPTKVFKLGLRGHSEDRLKNHPFRKFAEYLEKWKD<br>AQAHNLVDWGLKATAALPETITGNTVLTK*                                                                                                                                                                                                                                                                                                                                                                                                                                                                                                                                     |
| >scaffold_104_R<br>67  | MRPNLVVLAAVATLVSRACTVVSATSTNQNINSLDQALDIVENHAGNGNRFLRSANIVDDSDDDIDSEDEE<br>RGGKTWAQKFAKWNQRGESANDVYMRFGLEPLVRKAYKYGGIQGLQKNEYRKAAYSAYLKDKGLN*                                                                                                                                                                                                                                                                                                                                                                                                                                                                                                                                                                           |
| >scaffold_36_R1<br>210 | MRFFMVAVAFAFASSCETASAEAPNAFLIDDNTNAVFSRYLRSTQTDSEERIAQVLKSEDRTVANVMIK<br>YQSLYRAKITPKQAKLMLGVSDNMVFEFTKMPRIQRFYTGYYSYFTTMEKRKKWKKELKNQVMV*                                                                                                                                                                                                                                                                                                                                                                                                                                                                                                                                                                              |
| >scaffold_379_F<br>2   | MNIAVLLCFFAFPSGLFFSFRRLRAASLAPFLS DIRWHV LGGPSLQHFTPKQQQLHALPLQAAAYLTSSAAFC<br>QLHRRALISLRL*                                                                                                                                                                                                                                                                                                                                                                                                                                                                                                                                                                                                                            |
| >scaffold_20_R1<br>237 | MLGFLLLVMTVGGSTTEILGGWSSAAITPDTRAVLVQALSTTNVCVDSIISVRSQVVAGTNYEFRINGCRGLR<br>GGNCVRASCVAPRTFVVNVFDQPWTRTRTRVMSVSEI*                                                                                                                                                                                                                                                                                                                                                                                                                                                                                                                                                                                                     |
| >scaffold_24_F4<br>23  | MRLSFLLLAATFALLSSGTVASPTTNDPEISSPNTVLSSETTEGRHLREHKNSIDDTEERGFNPAKFDRMLNERS<br>YRQTRFGNWVDKPYTDMDVYKLLRVESNPNYRRIFHYQNYLQEFAPHLITP*                                                                                                                                                                                                                                                                                                                                                                                                                                                                                                                                                                                     |
| >scaffold_2_R38<br>00  | MKFVSTLVFMTVALQSSCSTAQIDFVRSYDHHAI DFSTSSKPTQPSVADVNTVEANQPLRSGNRRRLDGSAA<br>GIVIVGRNGGGFEPLRNGETPD*                                                                                                                                                                                                                                                                                                                                                                                                                                                                                                                                                                                                                    |
| >scaffold_11_F1<br>235 | MKAKLLLVLSFLLAVTSVAERHLRVADDANPLKPYEALNAVIEKFKNAKAGKPERRRLTGEKAFDKFVKAIA<br>VLKEKD HARRVEAN*                                                                                                                                                                                                                                                                                                                                                                                                                                                                                                                                                                                                                            |
| >scaffold_55_R4        | MRLFIKTLVALAAVLLATSTEA AKAVQTGGNEDVVQSSHLSRESKRVLRSEYDEEKLEDDDEEELLENDDEERK<br>NGANLFTDAKMKMLASDWYRYQVARRWKERKYTWQNLPPNVDPNLVAFYKGRFRERHG*                                                                                                                                                                                                                                                                                                                                                                                                                                                                                                                                                                              |
| >scaffold_55_R6<br>23  | MFFLVKQLSAVNHMIRFSLASFLGLFKGTATKMESSSTKDRILRLIPILEHKVLMFVGRALFKEHRPFGMH<br>LVHGMHPECFDKNEYEFFCGEVVELERGS GGHSTLPEWASPERKEAFTQFVETLPRLTQLCKFESHDMWIR<br>WSKSMECEQNFHPKMDKSGSAGGLSPFQKLLVVQALRPDRLQSAIIQFICGVMQLKSLTPPSLDFKVGITEE<br>ATNTTPVLLTTAGADPSKELEEVATSVVVGKGYFEVAMGGGQQEKALNLLKSTAEHGEWLCLQNLHLVVA<br>WLPVLEKEFSALNASHKFRWLWLTTEPHDAFPLVLEQLKITFESPPGMKKNLQRTYAAWNPAFIAKGN SAR<br>AQLLFLAFFHALLQERRTYIPQGWTKFYEFSGDFRAGSNVMEACQTS GAAIDWQTLHGLMENAIYGGRI<br>DNPYDLRVLRCNLTEYFSQDLLSGHKSLTRGVKLPQSTQHADFLDIIDRFDPIDAPAMFGLPDNIERSMQRSL<br>SGQVIAQLKALSSNEAEATTFDREKWRAQLGPLLETWSKLTTGFQLEGTSLSSSTGKNLQAMTPADAFVALE<br>NEYALDLVQQVNSILQALKKVIYGTGLLTPAIQTVAKALLKGVPT EWAA*                                         |
| >scaffold_325_F<br>4   | MLSVLSLALMLAVVTGAFETS RDVKNVGVTPDSRRLGFTADQEERKFGGPATGTDHSNSHAWENFKAWF<br>VRTFFWRKREQTRRLRNYSSM*                                                                                                                                                                                                                                                                                                                                                                                                                                                                                                                                                                                                                        |
| >scaffold_50_F4<br>3   | MGLFYLVCAILAFVARDATGDRVIVSDGFNQHRENAARASVVSTTRLLRTRKSVIDEERVGGIPVSATDKVAK<br>FLKSSKVTDKLQEWLRKGTAEVSYRNMNLKTSQLFENPQFLRWLQYADDLSASGKGTSAISILSNKYGDEK<br>LYQMIRWAKEKLNQDGLMRLQTEQLEHVVVKVGDPEVFKLYLNHAGGGILSSSQFNWAKYVDDLS<br>AKNEGATVSIPTLRKYSDNLIKIALAAKEVDETETMGMKLEDA LMQFWIHRKESPDNVLDLGLKSTGT<br>LLESPLTILT KYEAYNAKYP SMKTTMIETLRTFGDDKVAKVLLAGRTESTTKKIAKQFQADQLDMWLNLSG<br>QSVDDVYKLLNLPSSRRDLLGDFGGEKLFDTWLTFMNAVSIKTP EKTSTIFSKLATS FEDRPMQILEAANKFP<br>SMEKAATKLQLEKAQSIFSTGVSPYAFR MVALDNVGDVLSLSPFKKWMLYVEDFNKKNPGKEDSWFLSL                                                                                                                                                                                |



|                        |                                                                                                                                                                                                                                                                                                                                                                                                                                                                                                                             |
|------------------------|-----------------------------------------------------------------------------------------------------------------------------------------------------------------------------------------------------------------------------------------------------------------------------------------------------------------------------------------------------------------------------------------------------------------------------------------------------------------------------------------------------------------------------|
|                        | RVNYQGNRLDRVIDKAMKDPSTMKLAKFVEKENMKEWLVRWEHPPSVAFRELHLNKAGEKVFSA PKFEL<br>WVKYLDLDDWNQAYPSKKT MIDGFVDNYHTLDLIPILAAAEKVPSTKKLASQLKDALVDKWVAEKKT LAYVKS<br>WLVNGVPSSDDMLKRFATKLSA*                                                                                                                                                                                                                                                                                                                                            |
| >scaffold_11_R1<br>430 | MRSYHFLLLATAALLSSCNATAAVLCEGQVMTSADAAVPRALGTSNSKRSLRYDYDEEEDETDKHHQKND<br>KYDEDEEEERTWSAAQIDKWTAKADEWVDLGKTPAYIKAKLTAFNGVMSDKNRKYELFLAKWGRANPDEF<br>GRR*                                                                                                                                                                                                                                                                                                                                                                    |
| >scaffold_22_F2<br>08  | MALCSCICTGIACFPVSSHFAVYFHLSPHSLLSLRRCHTDTAERLLRRVLLIARRTQEQRRAEWLQVATQR<br>AERSGSRTIQHGHTGAGWTCLLLHRWVVISLFPRLHSHSTGHQLVSL*                                                                                                                                                                                                                                                                                                                                                                                                 |
| >scaffold_29_F1<br>480 | MRSVYVVILAVLALLCNDALAATSKTDLAEELTKNERNRSLRGEVIADEDSYAIDEERVQTSGISKVAKELK<br>KANLKKVSAALEKAKSNPSKLAVNAKMKKAIKAEKILAKLSSMENDNFLRFLKANFTPQRAKSTGKIKNPEQF<br>AKYEEFYKLAKLIGLK*                                                                                                                                                                                                                                                                                                                                                  |
| >scaffold_3_R39<br>1   | MLPTELVLFAFVVGRLQAGYAPPPATTSEWPLLFSPGLGNVWHTFAFLRINRFLRIVHLRPLSDQLQRFLLYD<br>RRLKRLTPGICYLVRALDFLLGTHWLSCLFYGVSYLAYDDGEMSWLTPDMLAFGDGVRDLADIRKVP LLQS<br>YLRTYHFSIGAITVCYGDIIIPMNAQETEVMAVIFISVALFMSLGGFYKYFDMELGRRAEYEERVAQVGHFL<br>KFHRFSDTWRQMQVYFALSWSRESRGRERELLSGLPPSVRQDLAQHVHASLLKNVALFTRCDPTFARAIIA<br>ALQHEFFVRNDVIIQRGDMERSLYIVESGIVLISAVRKRQVHAQAGGAEQASNDPVGADDNRSPGVSVN<br>EWVRASVGSALRLRKAKEKQANTPRQRQKSLVALMSPTGTITDINNQTREEKIYKGFDFYGERSLLLG<br>TPRNATCMALCVTSLFVLTSARFEAILDEFHERSNSVSAWVMTRTPSLPPDERPIDN* |
| >scaffold_7_R68<br>1   | MKACVYLPSSLFLPCPSTSAEPTDPEDNSTPHLDALERLLDRERARQLVNRLLRRPDQEIDLHDSIRWH<br>VRYGPERIPSPQPSPPTDFIETYGDEYAVSDDNSSDSGTESEQSC*                                                                                                                                                                                                                                                                                                                                                                                                     |
| >scaffold_3_F35<br>36  | MALVFFRILLVCLQIGLDEEAIEDHPTRKTRRQLQAGPHEASSEERVEETHEPEPMARHLRQFPTQHFDIV<br>QSIFGRIGQQIRRAGIDS*                                                                                                                                                                                                                                                                                                                                                                                                                              |
| >scaffold_61_F2<br>09  | MRLFLLLVAIATFLIASEAFSTTGDSNQIYNVDSVPGPRQRFLRAHAEVLDLEKEMKMMKMMKRKVTKEDE<br>AKTLKITDQIDDIINKHAPGMHEFMQTPKYQRYSNYMNFLNDMAKKPEYAAALVEEIKAKSRAQVALKTRFKP<br>TTSQNRWQIIFASLKGKRIGK*                                                                                                                                                                                                                                                                                                                                              |
| >scaffold_23_R4<br>90  | MQRRMSTPFFLMITTIGDAQGEVWVMI PADNSPLIKSDNFSRNCGATRRTRWATGVALPTSMSQTAPRA<br>AGGRAFPPIRRCLRFQMICLNRSICSGVLPSASSIWISSILTSSVVALTSGSTAI*                                                                                                                                                                                                                                                                                                                                                                                          |
| >scaffold_25_R1<br>22  | MYRILLTTFALLCGFSNAVNSDARLLRVDPTEEEKGGFTTYVKDSLTKWRINSKIKSWVKNKKTDEYVLKKG<br>LSTLTGKDLVNAPKYSQFQDFKVG MWLKEATPTTTVFNTLGLNKVEGAVENADDFGTYVKYVITLGEKADN<br>YPLSQWPRLFGGGSLEQLLEKRKILRLQKRNVL EINFMLG*                                                                                                                                                                                                                                                                                                                          |
| >scaffold_640_R<br>2   | MRICLCYLLSLTAVVSGSSVNLRASQKIQSLNVVQARMSGRELREDLNTDEATEERVNFGFLKADRLKSAF<br>QMDETHIRTKSMNHKRN*                                                                                                                                                                                                                                                                                                                                                                                                                               |
| >scaffold_38_F1<br>173 | MRSYCVLLLVYAVMSTAGTESTAMDSTQ PSTQYDIVLHVRTLRTGEYTVSEERAAGASAVESLGKATTSVD<br>DVETWLKRGDTANKVFKALKLQKAGDNLLDNPQLSTLMRYLRFNEANPTKKTSLIATVTKHYNHGLTKIIE<br>AGLASTSKKTVATAKHLQTEQIHYWMAHGRSPESVFGVLIQYTKDALRRSVLLKDKLLPFTWISSDLFEKPG<br>LKTWIRYLDEFNVRNPKQKTTLSILSKRYNDKTLANMLIAANKAESTSSIAKRIQSEQLTQWLSKGGKTS<br>DLFTMFQQLQKAGATLFQNLFP AWIKYADDFRVIHRDTQLETMTTLMKHFDLAKMIMTAYDVPSTKSLAS<br>R LHAELLRGWQWRQETPDDLYILLKLC*                                                                                                       |
| >scaffold_25_F1<br>656 | MRLSLLLVAALVANSDAAPQSTSSLTKFSTDVAPVRSR LGASKTKTEVDEDDSFDP EEEERGISMYGKLDK<br>VDDILKQLNLADDTVLK KLIAGKGGVEQLITTDKGVKTLVITSKKTGKKVFTFNIDIENIRKIESTPAIKKQISQ<br>WKKLQLSPLAVSRDLRKKGIPRTTDNVMWEAFRLYSATSGRKFNSLRPTGL*                                                                                                                                                                                                                                                                                                           |
| >scaffold_77_R2<br>49  | MWMTQYHLVVAPALSILTSARDEMGTQEQTAMLKEYLDMAS YTVDDLKDKPSRCRRLDGKTVQDHLGP<br>EAYQDVARALRVLQVWEKVYPKASIEDELAFDLRLPQLNSTKS*                                                                                                                                                                                                                                                                                                                                                                                                       |
| >scaffold_1_R40<br>7   | MRTATAFATVLALIVATNGAHVSPNTPALRGLRPTADTPSVEDDKEDRKH HHHVKKVKKIAIPVVPVEVPQ<br>YIPVPSVPSTMVASSNNAVIGPSTNVAGPGAAPGAPGAPGAVTPAP TTLNGRPAATPAATSTTRS RPTPA<br>PTNFAGARPSGAQLPAAPVQAGAPGMAGFPNSVGIGDNTNNNAFGAGIGAAGGFPM TGNLAGGFGG<br>NPM SFGGANGMGSGGMFGGAGPAMGRLNGNDFGGNFGQSMGFGMQGGNGLGGFGGQGMMA<br>NFGQTGNNGFAGGQALTQGGFGGNSFGGGFSRQRRR*                                                                                                                                                                                       |
| >scaffold_43_F1<br>201 | MRWLCIKQQVWLQSHCLMVVSPFLVCCPCLSDSNVFTSGW TMMLLGSQMWKSSLQNLEWLAAISSACL<br>QMRPRLLRMQMMLFALVSTSLLS*                                                                                                                                                                                                                                                                                                                                                                                                                           |
| >scaffold_6_R23<br>12  | MLLRIVIAVAFVTISLVATGSEASSITVVDVADRSTQVKRSLRLRNLESVDEDRGPIAGLEKVD DILTKEKAS<br>RKAGKVP SGLKNLLLRNIDEFAEHSKLAKKLSGLKLYKDAGLEKMSLSTLRQLDDIEVKRVSDIKNGITGNKDT                                                                                                                                                                                                                                                                                                                                                                   |

|                        |                                                                                                                                                                                                                                                                                                                                                                                                                                                                                                                                                                                                                                                                                                                           |
|------------------------|---------------------------------------------------------------------------------------------------------------------------------------------------------------------------------------------------------------------------------------------------------------------------------------------------------------------------------------------------------------------------------------------------------------------------------------------------------------------------------------------------------------------------------------------------------------------------------------------------------------------------------------------------------------------------------------------------------------------------|
|                        | GGMRRKMDHVVDVAPAKYLTSIHGRGDQLYGADGSRLSSAVVSRPAEQGGGKVLIISSSKPEKGDWLLP<br>KGGWDKGEDIAALREVMEEGVVRPVLFFLGLSYQYSN*                                                                                                                                                                                                                                                                                                                                                                                                                                                                                                                                                                                                           |
| >scaffold_405_F<br>4   | MRLAQILVIAAASLLFAGETVAVATSNQVKISKVAQSSPSQRLLRSNKYPITEEEDESEDPVDFEERGEEDLEE<br>RSPSSAIVSKLDDIASRWGTTYARVAMGQSTISQNKIDALLSLRDAYVSGSKAKAAKIAVLRAND*                                                                                                                                                                                                                                                                                                                                                                                                                                                                                                                                                                          |
| >scaffold_9_F15<br>5   | MPTLLVVIIVSTAMAILDMTRTLRIRISICWYTRSIEFLLSLPLRWCDSSRLINNSILIHVHRDRFIRCHHGRMV<br>WVILFLFSYRTVVSHWRSSGRRVSRVVFIFTMRSIHR*                                                                                                                                                                                                                                                                                                                                                                                                                                                                                                                                                                                                     |
| >scaffold_42_R1<br>91  | MSKVLLLLVLSVFALVSCDALSAPVGSKLSLKTDELNAQPIDAKRMLRAQEPTNAADEERGMTELANKFK<br>AWAAAIAIKTWTNSKLVQSMNNKLASLTQKGRVQIEKLLKQDNVNVNVLVYQNKVKPDELFLALKLDPKLL<br>IADAPAAWANNPGLSMFYQYATYYAKMTTKA*                                                                                                                                                                                                                                                                                                                                                                                                                                                                                                                                     |
| >scaffold_73_R2<br>70  | MRLLYLAGVAILAFIAGDATGAKVLPDDSDHNRAQAASASVSTTRLLRTRSVIDEERAGGISASASDKLAKL<br>FKSSKVTDEQLQQWLNKGKTAESVFYRMNLENTLYTRVFKSPQFPRWLQYADDLSASGKGSAPISVLSTKYG<br>DEKLYQMIGWAKKESSTKALGTRLQTEQLEHWVKVKGDPPEEVFKLYDLNYAGWRFLSNSQFSAWTKYVDD<br>LNAKNEGAFVSIPTLRKYFSDDDLKIALAAKRSRGDTEAMGKLEDAFVQFVWHRKDTDPDNLVELGLKQST<br>KTLLESPLLSLLTKYTEAYNVRFATKKTIVIELVRAFDETVARMMLLAGREKSTTKKIAKQFQADQLEMWLN<br>GQSVDDVYKLLNLPSSRDHLGDFGGEKLFDTWLTFMNAVSIKTEPKTSAIFTTLAPTFKNRPMMQILEAANK<br>FSSMEKAATKLQLEKAQSIFSTGVSPYKAFKMVALDNGDVSLSPLFNKWMMLYVEEFNKNKNGKEESWFLP<br>LRGNYQGHGLDRVIDKAMKDPSTVKLAKLVQENMKEWLVRWKYSPSMALRELHLNKAGEKVFSAKPFEL<br>WVKYLLDDWNQAYPSKKT MIDGFRGNHDLVPLMLAAAEKVPSTKLASELKALVDKWVAEKKTLAYV<br>KSWLKGISSDDMLERFTAKLNSV* |
| >scaffold_300_F<br>13  | MTGSTPDHWLCFVISSSLCATTGICALHCCVSHSLTFQLDFQRLRLQEQQSMGVTTAPLKSPMGSPAVPY<br>EPVQTMWEARPRKYKSILFEV                                                                                                                                                                                                                                                                                                                                                                                                                                                                                                                                                                                                                           |
| >scaffold_39_R1<br>000 | MMLVLLAICETIHVAAGTSLLFESDFAFGVDSTTSACAIIDRPFDPDKHLLYSNLTNLIALARCTVLERLEVS<br>CKDMDQNRNKFSSRLRSYLLHVPVALYSTERTSYHQGRNHIHYHVGLI*                                                                                                                                                                                                                                                                                                                                                                                                                                                                                                                                                                                            |
| >scaffold_7_F14<br>94  | MSSKAGLISCALWLLLLVSTLGVDAHKRLLRSEVSHDNLEDRVLDNWKLSLLVKVGSRTKADKLYAKHVVG<br>KITGNFFDTNAFAAWFVAVQMAAYAKTPAKAKVDMVSSLTARYGDQALAKMLATTEDDKFIREMKAIQLDN<br>WQKDKRTVGSVYKLLKLDKEQDELLQSPLIATWIAIYATKLDNEDPLGAVFSTLKTQYNGKDFATMLLNKDT<br>DDSFVVAEKLETLLMKSQREDKSVVDVYKLLNLDNEGDLFFQHPLIDTLIRYATVVDKDSFSGVFSLLQAR<br>YNEEKMTDMFMTMRDWWPRNILDQLEDLLKTWQRQEKTMDDVFLLKLEQQGDSLFSKLLSTWVSY<br>VAKVETNPYNVVFSLKSTYGEETLSMIIQARDMPTADYVGTGRRIRESSVQGLGEGQVHCP*                                                                                                                                                                                                                                                                          |
| >scaffold_17_F9<br>40  | MQSVTSLACVNGAFLSSVAVIAGSDRSLRVLVDVGAGGGGRTMRVVRDAHSRAAHTVALPRPTCYTSHPSNF<br>YDLLSSAPDSTTHLWDIRADNCVMRFCEHVNRVHTLGVAFSPCMRYVATGSEDRAAYIIDIRTGRRVLK<br>GHTDVVTSVAFSPLHPQLATAACDGTFRFYSSTRSD*                                                                                                                                                                                                                                                                                                                                                                                                                                                                                                                                |
| >scaffold_21_F4<br>92  | MSSRLNLLFTGSFLLMARKEIVRIFHFLLLVNCSAIHATVSSSSGKSITATRHRRQAKPSVSRARVDG*                                                                                                                                                                                                                                                                                                                                                                                                                                                                                                                                                                                                                                                     |
| >scaffold_2_R24<br>30  | MGLPLMSSVFPFSLAAGLGGSHATTTWNLADFVSRLTSELPISLYGVMAGDATHLHHVLAHIGFALFSGV<br>DVPRVTRPSIRTWSQDLVGE LRLLRSHALPTEVLEQVTGSNERRSALGNELLRVVEPFVSELVDFLVRATSAS<br>RAAAFGTNSATFLRTMTQIVRQLRVYARGESTESEDSDERLKRLLRGLLVWLGMMENMARFVIDSLVCW<br>AEGDNSSIRGRTRQREENSTDSIPAIRQRE*                                                                                                                                                                                                                                                                                                                                                                                                                                                          |
| >scaffold_30_R1<br>833 | MSDSPAKISAVCTALLLLAPFQWQSTYIPLPSGLLDFLHSPVPLVFGCHSLSETAEWSDVCFYDIDRDRIAVP<br>AVTRHLGPSSIPNGVELCRLLRKARERFCSLRPTSKPWYELSEEQDTIITLTMQEAEIFLRDLGFDISSQDLAASI<br>SGKSSVLLLLREHEVYSRIR*                                                                                                                                                                                                                                                                                                                                                                                                                                                                                                                                        |
| >scaffold_40_F1<br>027 | MVVKKVGRHLHLSFLELGDCAFDFHCRLLTSRVHSIASSASLRPSRWLQSSRSSTLWTCSRLTRSSGSTRTR<br>TCMTNCNRCWRTIRRRSRTL CVRRSRYHCRRLRDSAVTLV*                                                                                                                                                                                                                                                                                                                                                                                                                                                                                                                                                                                                    |
| >scaffold_5_F25<br>81  | MRFHVLVIAAFVLSIDTFSTVSATNTVPSRGLRRIIDEERAGGAI SVTSEKATLKFSSKATDKQLQKWLQK<br>RKPAEDVFYRMNLAKTGTGIFDNPLFIKVVQYADDLSATTSGKGSIASTLTAQYGDSDLKMLNVAKQDSK<br>SKELASRLQSDQLEHWVTIGKDPSEVFKLYDLNHVGGSLRNPNQYNSWTKYVDDLNAKHGGEVSMIPTLRK<br>YNYDEDLFAIVGAASVDALKSAGVKLENAFVQYWINDKQTPVKVLAELQLGATPKTLESPLFSLAKYTDVY<br>NVKFPQSKTTMIETFTQAFGIEKVAKMVA AAKETEGKAKKIATELEAAQMOMWIRSSKSVDEVYNLLKLPK<br>TLVIDLSSPLFSTWIAVMKILSIKNGDEMILQIKTLSMQFADRPMMLQLQAMEKFPNIGSTATSLQLRKAD<br>DIFATGVTPFRAFKMALDVTGDSVLSPPVFTKWMSYVDDFNKRNPTKEESWVFSRSTYEGDFMDKLIETA<br>RKSPKTVKIANTVESERMKDWLTRQKAPEHVHFHLKLNKGGEKAFSSPNFQLWAKYLLDFNLQYPGEKTTM<br>IDSIRANYRDIELMPLNEAAKIPSTEKLANKLQNALRDKWVDEKVTVTQLKGLFGHMPSSNDWIQKYAEKL                           |

|                    |                                                                                                                                                                                                                                                                                                                                                                                                                                                  |
|--------------------|--------------------------------------------------------------------------------------------------------------------------------------------------------------------------------------------------------------------------------------------------------------------------------------------------------------------------------------------------------------------------------------------------------------------------------------------------|
|                    | NKLS*                                                                                                                                                                                                                                                                                                                                                                                                                                            |
| >scaffold_39_F70   | MRLHCFLLAVATTLAVLNNGITTEASSLRKVPASAPIDSINAVQPETRRRLRSAETVYRHEDSYKRRPFIEEKLHKALTNPKKTKRLYARWYKSGFTKKQVAKGLDQSENRELDVYENLAKGYAKYVDARRTQQQSV*                                                                                                                                                                                                                                                                                                       |
| >scaffold_48_F1199 | MDTSGACVLAVLLFVDPNTDTPQKIVLNVGDCRAIIREAPESSTGTLKKGKAASGMTFALSEDHCAANTKERMRALRSGAYIQNNRIAGVLEPFRTIGDIDVKGPDMDWVIPTPEIHQSELLVGRSILVIATDGVWTVLNNRRAMAHAVKELNGGRSSAESAAQAIKEAREFGSSDDITVVVVSV*                                                                                                                                                                                                                                                       |
| >scaffold_77_R178  | MLLCVFTVIAAIAVSDTTATNAIDDDGVLQTTSTRYLLGFNQEERGRVGGPATDGGTDKVSDDWWPNFKAWFKRTFYFWKKKETRRRLRDQADY*                                                                                                                                                                                                                                                                                                                                                  |
| >scaffold_15_R3220 | MNNLGRSSSVFFTAFFLFFESPCSAFSSINAASSASLPLAVTASCPNLENITRKLRFNAKMYSPLLERTPSTAAKITADLDWITLQQ*                                                                                                                                                                                                                                                                                                                                                         |
| >scaffold_18_F2149 | MRPNLVVLAALVSRCTAVSAASTNQINLSESNQALDTLQNHAGDGNRFLRSANIVDDRVDIDSDDAIDNDDEERGEKNWPKFAEWHADGKTAEDIYKYSALSHVMRYAYRTGSIQWLKKNYRKYWAAYSAYRKDRGFD*                                                                                                                                                                                                                                                                                                      |
| >scaffold_9_R771   | MRGSSQSSQQLCMVLLIRILIVRQLRSLAHQEALLPRAHETSFLEHPARVRHRIVAPHSPQAVGYFGYEPLEWMTVLWEIRSV*                                                                                                                                                                                                                                                                                                                                                             |
| >scaffold_42_R407  | MRIYFVLLAVTALIAAVSGSTANLRASQTIQSGDVVQDNTSGRELRGDLIADEATEERMNFGFLKPDPLKSF AKQQMKYVYNERIFNDLLKFFEDPDALYTTLNLISKIKNRSNVNGVKTSRYNLYENFLISYLDKYPNWRSTLK*                                                                                                                                                                                                                                                                                              |
| >scaffold_5_F2028  | MRLSYTLIIIAVAVSSGNAVATTNGRTTELSAMASPNAVASVDTAVGGEKSLRYHNNEGLEDESDEALLEE EERKYTNMFSTTKLDEMNGTKMMSRFRKWKARGYNTYNLPAVTQKDKYTWIRQKYRDFLYHN*                                                                                                                                                                                                                                                                                                          |
| >scaffold_73_F95   | MRCFYLAVILAFVCGDGTGTTVLASDFSNQHRDHVSSITISITRFLRTADASTGDEDRVGGVSISGTDKIAKLF KSSKVTDEQLQRWLSKGPVAFVYHGLGEDSLYEVI*                                                                                                                                                                                                                                                                                                                                  |
| >scaffold_42_F41   | MANKHDACQKSLFLFLFLSLQLPLSAQSPSCPTESPLPPSAPDWQAAPPFWPLFSIYDVVTSSSPPAHWTSRTLRSATQPQP*                                                                                                                                                                                                                                                                                                                                                              |
| >scaffold_5_R2132  | MRLSYVIPAIAVTFASSGNALAAADGSNTGLSAITSPNVVASIDTAVGGEKSLRYHTNEDLEDDSDDEGLDDAEERERRGNMFMSTTKLDEMMDGTQLMSRFKWKQELKYNMYNLPDILASKYDELKMYRRFLYNN*                                                                                                                                                                                                                                                                                                        |
| >scaffold_44_F578  | MRFSYVLLAAAAALLATANAIEADPRTRSLRAHKSHEKSQDEERAFTYTFNFSLWDDLNSLPEQFQMRKEPWYLRIRFRSWSRGMGTSDEAVAYMRSQGLSQKIDQFEDAYIKYRAHKLAKGK*                                                                                                                                                                                                                                                                                                                     |
| >scaffold_6_R3203  | MRLAIKTLVALAAAILATSTEAAKAVQTGGDVHVQSSHILPGENKRLLRSEHDEGKLEDEGEDDEEERKYG                                                                                                                                                                                                                                                                                                                                                                          |
| >scaffold_11_F1232 | MKMTALLTVLTVMLAFVSADNSPRQLRSTLTTSIQDTDGNRLLRSEGLISNLLGGLNSLLNNQQSTNPPTTSTDPTTSEQNPDEIDLLRSRRVS*                                                                                                                                                                                                                                                                                                                                                  |
| >scaffold_31_F1104 | MRWYRVLLIAVVSFVISAQESESHIRTRSLRGNVAVNYSFKDVEDGNADERAGEKEVIKLTSSKTMKLSRSVTKAANSFSEKIPALPIKAKLQVWSNTGKSVQFVRQELGLTDLAEAAKKTQSFKYDDFVTSQLPIWAKKDLTPDEVIEQLGMKGLPAAWFKADPNFKYDNYLKVVPYWSKNNVEGDVVKMLNLTLSGAARREAVNFQYYDDFLVSQLRVWVDKLDLPGVTVMAKLDDLKLTGKEILHPNYEYKYFVKNRKLKAWATEGSLDDVAVRLGMDLHGQVQLKAHPNFKFLEKYQAKAFQYQEGWLKQGVTTFDMWNDLQVYRVPMSILRRSNTYNTYKNYVNVVDNYIIRMKKGVPDLKPLGLTSTKDATPHELREKTLIWTSAKRPEWYVKFALGLDGLGENALKEAANYQFYAYYLEAVKFA* |
| >scaffold_12_F482  | MRAHFLLLAAAIFLATSVDASANQAELSKVASPQSIETANIAPKRFLRTNKYELDEQEERIGALDDVIVKAGKTKMSNAELKKLVTPKVLENALSDRNMKLFKDLYAGKVSLLKRFKAVMKNNPNKEEVLKSYRWFERNYHISQAKARTAV*                                                                                                                                                                                                                                                                                         |
| >scaffold_30_R1705 | MVSAALASSGSLSGSLVAEPLLLVVLVSRSDSVALDVVDLPDDLDPDPPELLDVVPLVVALSSSPPLVTATMIPTAAPMTTRIPTTMRTLRAATVIF*                                                                                                                                                                                                                                                                                                                                               |
| >scaffold_5_F1718  | MQLLRNLVFLALFAGVVAAVQEEQPQKTHLRGLLDKIVSSDPTPAPVRVLVASWEDGKVGGEARKLRPIAEKIVGGETVVMFNDRRLLSTADDLESVNFVDRSNPNCVSVCGELTKWYLSGSEQCFDLRIAPKSADQIENGLIRGVSAAYSGLRPVAKNLYLKFDETNFIDGSRCEYEILSGSKTVREEEIASGSQAAMA*                                                                                                                                                                                                                                        |
| >scaffold_25_F1308 | MRLSFLAAAMATVYCATCNATVDSQNKVSMVQSRLNGQADGTRFLRTHHENEQESDREERDLTDVFEFKKAAVKKLAKEVMADNRRRAKDVFLWKEKGYTLDELNTFLKSAYQHVVYNQYMIFRQYV*                                                                                                                                                                                                                                                                                                                 |
| >scaffold_53_F91   | MRFFLVAALAAFAFASSCEAAVAEAPNAVQIDDNINAGFSRSLRSTDSERAIQLLSEDRAVASVKVYQSLYKAKITPNQAKVILGISDDMVELTKTTRSLRFRYTYGYSYTLMEKRRKRKKELENQVKW*                                                                                                                                                                                                                                                                                                               |
| >scaffold_11_R969  | MILSTWLRLSAFLAAIACCTTQLGTPRPSMWINVTCSNTFGRSVSRKIMPDTRMYVRTGPSGCCDAGQH KWLIDRILRAHTRRPVSRSTKESIYSRKHSTRPSEFDDGGFHSQDQRMMAAPRNLVSDGSPVRTAVASAPSPAP                                                                                                                                                                                                                                                                                                 |

|                        |                                                                                                                                                                                                                                                                                                                                                                                                                                                                                                                                                                                                                                                                                                                                                                                                                                                                                              |
|------------------------|----------------------------------------------------------------------------------------------------------------------------------------------------------------------------------------------------------------------------------------------------------------------------------------------------------------------------------------------------------------------------------------------------------------------------------------------------------------------------------------------------------------------------------------------------------------------------------------------------------------------------------------------------------------------------------------------------------------------------------------------------------------------------------------------------------------------------------------------------------------------------------------------|
|                        | SAHIRSGPDTRLLPLPACRTGRMSSTWPWTWSCCRRGAPH*                                                                                                                                                                                                                                                                                                                                                                                                                                                                                                                                                                                                                                                                                                                                                                                                                                                    |
| >scaffold_98_R3<br>65  | MRLSFLVLAATFALLSCDTVASPMTKDECNPSPNQVLSSETEGRRLRVHKSSIDDVEERGFNPEKFNRLMNE<br>QSYRRKRFPNWVSKKYTD RDVYNLLRVDSNPYKRIFNYQTYLENFAPRLISS*                                                                                                                                                                                                                                                                                                                                                                                                                                                                                                                                                                                                                                                                                                                                                           |
| >scaffold_66_F2<br>74  | MRWTSILLVAAAALTGVLDASTNVTANSVGMESAFSPVIHDHRSRLRVDDDDTVDDDEDESVDVNEERT<br>WFSNAKQALADKLALTAVASNFAGKSTDEMGEVLKLSRDQINTIFDKGEDSIRQILPGFKSGMDSKKFDDLI<br>KALPQEQQGVLLSAYGKYLFNGLL*                                                                                                                                                                                                                                                                                                                                                                                                                                                                                                                                                                                                                                                                                                               |
| >scaffold_5_F17<br>02  | MTLLAFFLEFGFCVLAMAAKPTFFSCCTVGPSALLLKP KRELVC TRSNATSSSPSSSELLSSSESLPSSPSRRA<br>LRFCSRSSRVISSRDVTNLRVAVPFSRFLRPLPPAAPGFPPGLPLSLIIVF*                                                                                                                                                                                                                                                                                                                                                                                                                                                                                                                                                                                                                                                                                                                                                         |
| >scaffold_10_F1<br>990 | MRVSVILLVAAFAVALNPTAAASDANTVVAVPNVHESIATGRFLRARPVDDYPVKDERDEDDSDDEKDEE<br>RMFSEFFQEKATALSFAFKLVSQSGDDLVEAVSGLSKGEFQALFNQGAHMAKMVPGFYPGMSLGEFGTVV<br>RAAGLSDDMENALMVGYGKYLALHMD*                                                                                                                                                                                                                                                                                                                                                                                                                                                                                                                                                                                                                                                                                                              |
| >scaffold_26_F3<br>52  | MERVGGLSCIAVAGATVALVEALLSGLEQVRVGHHSREVVQARKAIAYVLGGARRVEAQHSSASVRSHGL<br>RPRLKAEGLANCAARSLRLARSLLRGRNCEPRRERGAERHCKAAGWDQ*                                                                                                                                                                                                                                                                                                                                                                                                                                                                                                                                                                                                                                                                                                                                                                  |
| >scaffold_96_F2<br>12  | MRLSHFFVVVAAAFATGAIADSEPNHRNLRKHHDTLVDEERGIPKILDQNIPIERLNSLLKKMDQRKKAELA<br>KLIKLYESSPKFGRTKPSNS*                                                                                                                                                                                                                                                                                                                                                                                                                                                                                                                                                                                                                                                                                                                                                                                            |
| >scaffold_92_F1<br>4   | MRFSQVLVVAASLLFASETA AVATSNQAKISKVQSQSSPQRLLRSNKYPIKEEEDSESDVDEERGFATPD<br>EEEEERSPLSDATVGKLNKIAKGWGTTYGK VAMGQSHISEAKAKALLALRDAYISGDKSAKAAARMAILNA<br>NHR*                                                                                                                                                                                                                                                                                                                                                                                                                                                                                                                                                                                                                                                                                                                                  |
| >scaffold_853_R<br>1   | MQRMMSTPFFLMITTIGE AQGEVWVMI PADNSPLIKSDNFSRNCGATRTRRWATGVALPTSMSQTAPRA<br>AGGRAFPPIRCLRFQMICLNRSICSGVLPASSIWISSILTSSVVALTSGSMAI*                                                                                                                                                                                                                                                                                                                                                                                                                                                                                                                                                                                                                                                                                                                                                            |
| >scaffold_42_R6<br>7   | MRFCFITLVATTILASSGNISAATVLRNRSVTTSIDAVQPIEAAQTNSNRSLRRRNNYKDEEVAEEERSGIESLA<br>AQLNKKLLPTIRQVAHLDLGRAALTQQMSLSFDERQAIQALLQLSKKDRKAVLMLIK*                                                                                                                                                                                                                                                                                                                                                                                                                                                                                                                                                                                                                                                                                                                                                    |
| >scaffold_7_R19<br>13  | MRLLLWTLVILVILSSCDAASV NENKSLQRKLYTKVASHALAADDGFEHDKRALRGASNGVTEARAATVST<br>KFGSRLMAFFRSIKDKYLAWELKILVPGFEKMAKKGTTYQVREDFRTRLNWSGLWGTPSGFKRYAKLYRT<br>WLEKNHYSQLAV*                                                                                                                                                                                                                                                                                                                                                                                                                                                                                                                                                                                                                                                                                                                          |
| >scaffold_8_R16<br>99  | MRVLGAIFSALFLAAGIDVGSLLPNSGVAFVNPVPHSLAVETVESKRLLRSYEADSEDEERAGGQLGLVDKFAA<br>KVMQKLYKNPSDVFKRLKLDVNLENNKVFEGWL VYVNKFRQVKGVENFPDQALFNVIHQSQYYQRDLVP<br>LFQSLTHVQGMKDLARTMQFKLFEAATPATR TLMNKAWLEGFDTSDDVFHILKLDGVDHSDKLIQWLK<br>FSDMYKKLPTSQSTSWLDELNLVLKTKKPNQQETKFGLLFQALKEEKG METIAGKMESQLFERWMKMDSM<br>TPDKVGGMLGGSATTNWKRIEFKLEFTDDRYIFLKAYTEAYAANRGANVLKSVEKLAENKPVAAALERAIAK*                                                                                                                                                                                                                                                                                                                                                                                                                                                                                                        |
| >scaffold_87_R4<br>30  | MRLSQVLVIAAATFLFASDTVVIATSNQANISKIEQSIPSRLLRSNKYAVKEEEDSESDVDFEERGFATPDEE<br>DLEERSPLSAAIVEKLD DIASRWGTTWGRVAMGHSSISDDKIKALIAMRDAFISGKSDRDVARAMILMANK<br>S*                                                                                                                                                                                                                                                                                                                                                                                                                                                                                                                                                                                                                                                                                                                                  |
| >scaffold_15_R1<br>164 | MRLTSAFVAAASIFVCFQEA SAVSDSKGPESRVQTANSNDRFLRIDQDEERAGPQPSKSLLEKFTSKVTATK<br>LKRKAVADLTKLDDVVYLKATPGYNVPLFQRIEKMGFNP DGMLLKMRERKIDQTLKHYTNYWKGYPT<br>WTSNPSV*                                                                                                                                                                                                                                                                                                                                                                                                                                                                                                                                                                                                                                                                                                                                |
| >scaffold_17_F1<br>758 | MPVFDALLTLILRAIGCDRVCANQKRRMADIVKRMEDGAFRTGKAWRILRKLNKSEMKNDAERWSTFLEL<br>SNVLDPRAFNSRRGRALMNEAEQVISVQQLELAAVRGPVIVDKPEGENVADELWDIAEQIVEFIERKAAPVA<br>EPQDTTNDPTFSFDVVLVTDLEDYLKVEARTAPSGVNGMSDRETHIIDEGIELSVTEQLSRMCSSLKEEYVIS<br>SDILEKGFAELSAIERLDTVSIQVSFLLGMQMRKSCIIDHCESAKSEFERRIKRVFNQLAGKGQDMDHAASLI<br>VLSAFCPGQVIRECIRGARTGVLHHDLSLKVLSQSSPLLEWREPSDGSGLTLELELQMTVLDISRNOSSFDRE<br>SHNVVSFLLSLV GIDNSTSSIQSSSLMTVSKLITVCINPVWCCPDQSVEMQLNLLTLIQQLFHFFVATSADIDT<br>DTLQISFNLAFRALSSANSNDTKV GALIREKVL LLLKSIMELMPDPVSTIRLEQFDSPLNAPLWTLISLFSDDL<br>NEELCKGLEDVTA VEAYMQTSSVDEADPLPLPISIAIQALLWGLLWDSILSENVSVESTKAETWRLLDIIASFE<br>FCGSESPDETIKGSSLIESAVAEMMLECGNVLF RALLCNIIPFLLEYELTENFQEEKLIPQW AIDKVS ENPEIKE<br>QIPCRVSSHVIMRYVAKCWCLSGVANRQLNAQSDMLVLEALTHVVT AHDDQAITASKESL SGLTFCIQWLFCF<br>LVSAARELHLDLSTWSTVRTQLELSFLRLNQL EHLKAISEAEAKFSQVFVAAWLGYPDDQFVQVFKYISTK<br>RSN* |
| >scaffold_22_R9<br>74  | MILTTNLATWIFLTWAATSSMNL SKCQCTCCLNKCENPRPLRGHLLSSWVSGKQSGWPYQANLLHVHLLH<br>PRQIRTVGSRK*                                                                                                                                                                                                                                                                                                                                                                                                                                                                                                                                                                                                                                                                                                                                                                                                      |
| >scaffold_65_F3<br>81  | MRIPCSLLVVIALLSTTTNAISTEADAGRRSLRSMKAKVQDNQVEEERGGTGTSSLKAFVHDFDFNLLDNIFL<br>PADFKRMTKEPEFLRHMMASWQMGFMSVDDIVLYMTRLNMSEKAINQFKLAYTAYLEYLKAVAKAEKAA                                                                                                                                                                                                                                                                                                                                                                                                                                                                                                                                                                                                                                                                                                                                           |

|                        |                                                                                                                                                                                                                                                                                                                                                                                                                                                                                                                                                                                                                                                                                                                                                                                                                                                                        |
|------------------------|------------------------------------------------------------------------------------------------------------------------------------------------------------------------------------------------------------------------------------------------------------------------------------------------------------------------------------------------------------------------------------------------------------------------------------------------------------------------------------------------------------------------------------------------------------------------------------------------------------------------------------------------------------------------------------------------------------------------------------------------------------------------------------------------------------------------------------------------------------------------|
|                        | KLAKASLN*                                                                                                                                                                                                                                                                                                                                                                                                                                                                                                                                                                                                                                                                                                                                                                                                                                                              |
| >scaffold_25_F1<br>318 | MRLSFLAAAMATVYCATCNATADSDQNKVSMVQSRLNGQADGTRFLRTHHENEQESDREERDLTDFVET<br>KKA AVK KLAKEVMADNRRRAKDVFLWKEKGYTLDELNTFLKSAKYQHVVYNQYMIFRGYV*                                                                                                                                                                                                                                                                                                                                                                                                                                                                                                                                                                                                                                                                                                                               |
| >scaffold_184_R<br>6   | MRLSYFVLVAAACIFACGEEVAAVKDSQGI AVSHTDSL RGDNRFLRGRQDVADEESDDEKNTNVEYEERAL<br>PKLDVAAEKLMTRAAAKLTKSKLSNLAKMDD EAYHRAVVTNNFFTLERIEKMGYNPDKMFLKMKEMGKN<br>APLTPYQKVLL EYYSMFWKIKYPSWVSEVPRMF*                                                                                                                                                                                                                                                                                                                                                                                                                                                                                                                                                                                                                                                                             |
| >scaffold_1_F40<br>0   | MFVLFNLLSCTRLELSLFLPRPVAAAAIAAACADGG LGVTRHSPSCRLELSSVTASFVLLHQLRILRST*                                                                                                                                                                                                                                                                                                                                                                                                                                                                                                                                                                                                                                                                                                                                                                                                |
| >scaffold_6_R20<br>44  | MRVLLVALAVFASSVNTGVAGIQTKRSLRQYDFKSLTVADSKEEERNFVDKVDIARVTD DFVTKVKIPTN<br>MNAAVEKVTTMADDIAAVAKTVAKTYPEGLSKGTLAQIKEVEQLRLKDIATYTKKTGDGMRRKISPFPGMKI<br>APKYLESHVGRNMQLYGGDDGSRMLSSAVVSRSAKDG GVDLLISSSNPQKNDWLLPKGGWDKGEDIQS<br>AALREVVEEGVCFILYM*                                                                                                                                                                                                                                                                                                                                                                                                                                                                                                                                                                                                                     |
| >scaffold_60_R8<br>42  | MFSLPTFVMFLVVPILVMAEDWSTEGISHSLPNARSLRQERVVDNSDVSDKAQRISGHVATVLGHSAPMD<br>EVGQVVGMLLGV*                                                                                                                                                                                                                                                                                                                                                                                                                                                                                                                                                                                                                                                                                                                                                                                |
| >scaffold_8_F32<br>65  | MPQTPRCLLLKVL FADVHCAALYDLLGHSNGSDLKYL MILGHPADLQLSGIQFVRLLRGQSPVALPVAHQL<br>ST*                                                                                                                                                                                                                                                                                                                                                                                                                                                                                                                                                                                                                                                                                                                                                                                       |
| >scaffold_10_R1<br>425 | MRLSVILLVAAFAVALNPTAAASDANTVVAAPNVHES IATGRFLRARPVDDYPVKDERDEDDSDDEKDEER<br>MFSFFQEKATALS AFKLVQS GDDLVEAVSGLSKGEFQALFNQ GKAHMAKMVPGFYPGMSLGEFGTVVR<br>AAGLSDDMENALMVGYGKYLAHLMD*                                                                                                                                                                                                                                                                                                                                                                                                                                                                                                                                                                                                                                                                                      |
| >scaffold_81_F2<br>33  | MRFHALVLLSTALLATDAFKLTADVTAPQSRLLRKSEPKTNEERVFEGLTSTKLQYNLLWSKLQLGDDLSAV<br>LKSPDVAKIAKFNLRAPGSQVSMIQRITAKYGGD DVARTLVSIEDASDNPILLTMVWQLREDQIANWLKN<br>SETVPGVVSKLKLGTDESIFRSRALDVLEDFIKKYN TARNGDESLLKLT TIYGESELVKMIAKTRVLGRPPYSN<br>HPASIEKANNIESQLIQKWKSNLPDFRVMNKLNFDD DVSMALSAGKVGVLKYSDSKTSAFRRLSAKYGEA<br>EVAIAFAKAEGFLPEATALYRMQMNGWLSKGD TAGRVFSILKMKDTRDFVYKLDAL ETVYKFLKTKNPDDV<br>TDVFKVLKKGFGAGENKLALAIVRPFEITGYHKS LFDWVWARDLPLSVAVKVKMSEADVAAAKYSDEL<br>KPIIKQYTKFFKETVDLPEMPAVRVGRS*                                                                                                                                                                                                                                                                                                                                                                  |
| >scaffold_6_R31<br>91  | MRLFIKNLVALAVLLATSTEATKIQTSGKVDVVQSS QILTGENKRLRSEHDEGELLGDDEEGLEDDEEER<br>KYGANLFSAEKMKMLGDTDTEKKEEKSCQQ*                                                                                                                                                                                                                                                                                                                                                                                                                                                                                                                                                                                                                                                                                                                                                             |
| >scaffold_67_R4<br>06  | MWLLVTLVFGSIFTYADNSGSDSDNSIDDDY VESTYYYSSNAGLFGMLVAANTIMHLRCLRTAQLLVAE<br>LVNAGVDRLQPPVVMLATTNPTS AV*                                                                                                                                                                                                                                                                                                                                                                                                                                                                                                                                                                                                                                                                                                                                                                  |
| >scaffold_636_R<br>1   | MQRRMSTPFLLMITTIGDAQGEVEWVMIPADNS PLIKSDSFSRNCGAARRTRWATGVALPTSMSQTAPRA<br>AGGRAFPPIRRCLRFQMICLNRSICSGVLP SASSIWMSSILTSSVVALTSGSMAI*                                                                                                                                                                                                                                                                                                                                                                                                                                                                                                                                                                                                                                                                                                                                   |
| >scaffold_12_F1<br>261 | MGVVDWILCFTVCEEVGAACPCLTPSIVGRVLLHGKTKKIVSKPPTSNSQTMFCSFILDIWTTYTTMSKPIQ<br>SDSDLDALRKLTRQLRVAKLVTDRLKQTD RKNATQAVMRKWLP LSTTVLKMVTRVLPSPIAAQVKRAERL<br>CTISSEQLEQSPQHAQVFRSLQSCQTS EDAPLVIYICKVISVEANVLSDYHQSGLAATDEVYVGVGRVYSGVLR<br>EGQPVYVMDPKFQGVSGDMDVDTIDPSTVKHVARID SGLIKTYMMMGRDLHLKDRVPAGNIVIGVGLQE<br>HVLKTATLSSTLACPSLTKMPYQAKPIVRVAVEPED PRNFGALEAGLQRLYRSDPTVEHVQETGEHVIVALG<br>ELHLERICDKLKERFAKAVQVSEPLVGFRESIVDGT ISSFQENIVFKELLNPDVTKDDSEKEDINASA EVQDT<br>KVALGTTDPDGLTLKLRALPLETAKLLEESALL KRIAVSKKANDDMKDKNTVVELEAAASEDVS VFKKKLEK<br>SLQSSSESSFLKALPLDQIWS CGPRRVGNMLINSIPTYRATGCLFPSDSVAETHDSEKDEKIRKLENSIVTGFQ<br>MASSAGPLCDEPVWGVAFIIEDVVFHDEKSEEDK SEEKAEMSKYGPLSGQVISIMRTTCLMSFVKQPVRLV<br>EAVYECTVQCQAEQLGKLYSVISKRRGDIYSEELSDG TALFTVKAHLPVVESEFGFATDLLIQTSGAASN PQLIFS<br>HWSIEMDPFFQPQTEEEREDYGERVYEHYVRRYIEAVRKRKGLSRDEKVVVHAEKQRTLKR* |
| >scaffold_81_F9<br>0   | MRFPFLLLLLVTFLLVNGKADSQSTELRLLRDGNSPREEERALPPP KVS LFADWLKATGLKVSDKVRARYWL<br>WRKQSAEDVFRLLKLDGGLEKLLGSRKFNTWTSFVNIYNKKNPNEKVTMDGILSKTYGDLELAKALEVAMGS<br>MVKSERKMGTTLSLQREGWQAAGKTADDV FILLKLDKVGADLFTTPQLNSWYKYVSMQADSKSLMASV<br>LRNHYSDETL SKIFREAKPEIKRMRIIRVQLET AVAKSKPKQLSPEEYFKMLKLDGDGVDKFLASNLD TWIKYV<br>ARYNTKNPGQDVSTIKILT KFYGDEELAKVLEAGK MATTEKVATELQSAQFNQWLSLYSTDDVFRLLKLDN<br>DLDSLITNPNLITWITYLQG FNANNPGKGTMMIKTFTK FYGEIPLAKMLESSLVPKTEKVATQFQAQFKQW<br>LRDGKKPAEIWKALKMEKATWMQNPDAQVWYKYKDWYKLNKPQ*                                                                                                                                                                                                                                                                                                                                             |
| >scaffold_6_R31<br>37  | MPLLILFIASILATTIYVNTKLLNILPGNSLGVSTY NHSHLDWKMDTAAFETSVGT SIHPTSSFYRRGKTFDRSA<br>SRERAVMVCLHDAMLNMGSLLLRELRLCLGNHELIQVYHCGNELSDRSVELL FSLDNRVELVDVCSDSLSSRGII                                                                                                                                                                                                                                                                                                                                                                                                                                                                                                                                                                                                                                                                                                          |

|                        |                                                                                                                                                                                                                                                                                                                                                                                                                                                                                                                                                                                                                                                                                                                                                                                                                                                                               |
|------------------------|-------------------------------------------------------------------------------------------------------------------------------------------------------------------------------------------------------------------------------------------------------------------------------------------------------------------------------------------------------------------------------------------------------------------------------------------------------------------------------------------------------------------------------------------------------------------------------------------------------------------------------------------------------------------------------------------------------------------------------------------------------------------------------------------------------------------------------------------------------------------------------|
|                        | SKEMATKFRSWWIKPLAMYHTDVRHVMLLDVDDVILKDPVAVVRTLDGYKNTGTTFFYDRVISNKRFLTGND<br>TGEMYVHKLRLTFNYTRFNVSSEGFNPSQHMLNTFAFNGKSIHEMDSSMVLIDKQRAGKVVMDILLWFITEE<br>RFRFTYSWGDKETFWLAFEMARVPYFFSPWGVSVVDSMPNEDLKNHPDTLCGSILQFMPVKGMNDTAEV<br>LYMNGKALIDPYPQIGIFIRKAKQNNLNFNTIPTQMTTPQKRRQINTKAYPGKKFNTECLVGMGAVPLPHTFS<br>PNLLRRRVHFLGLAMGVLGSLDHCETY*                                                                                                                                                                                                                                                                                                                                                                                                                                                                                                                                    |
| >scaffold_2_R11<br>14  | MPVCYFMFLCVSYFASSSCQIKQHVEAFIGDLADAFVPEGGVLVQRRRNLTLQGLVARQVHTHELEVPAH<br>VARYLRHEEVSRLDADLDAREGAMYDVRREHETELHELREQTREPHHEEQQLDVALWPLQ*                                                                                                                                                                                                                                                                                                                                                                                                                                                                                                                                                                                                                                                                                                                                       |
| >scaffold_5_F94<br>7   | MRTTFLWLLALVLCVCAAEPKTPEPTSSANARDNDPVVQEIRGLRNSGMKLNDAKDFKGAIEKLRERAITLL<br>HNRVFGEGRHAIIDPSEISQDAALYAQILNDYGSVLIRAKQYDEAIEVLEDSVTMVEKIYGDSSHPSLGLSLRSL<br>ADAYMAKEEYKLAIKKYKTLRKHVKKGLEETHEAYIEASLRIAEGYKKGKLNKKNLKVLRDAVKAQGTEINGLT<br>TGIAELYMELSTAHTAVGEIDDALRAETAASAIFLQRDGEETLSYAFSLNALAGVKMRQKKVDEAVKLEHAH<br>KIAVKIYGENDPITQASAKTLKEVKEYRLDMHAQKDEL*                                                                                                                                                                                                                                                                                                                                                                                                                                                                                                                  |
| >scaffold_48_R1<br>407 | MRALCFIFSVLLLLLEIDASSVFNSGAAVTHPHLELTQVTTPTLRLLRSTHEEENDERAGASVLDGIVAKAMQLI<br>NKNPEDVFKLKLANTNLQNNAVFEQWLQYVYKFRAAKGEDKFNHRLFNLLRKSQNHPPDLLVPLFQSLT<br>HVQGMEDLARTMQLKLFESGYQSTRNLMNKAWLQGLDTPDDVFHILLEKNALESQQRLPQWLKFAEMY<br>KTQNKISSWENELSLLLKTPHEKETQFGLLFQSLKKTGEMETIAAKMEAQLFTRWIKTDTMTDPKVGCVLAS<br>PTNTNWKRIFEPLVTEPRHVLESYTVAYAASRGGKVLKSVEKLFANNQPVAALERAIV*                                                                                                                                                                                                                                                                                                                                                                                                                                                                                                       |
| >scaffold_59_F7<br>11  | MRLTYIMIVATAAILACCDGASAVSDSKRLTVPLDRVQTGNANRFLRVHHEEEEEERTGPQFIKLSLEK<br>FAKAAETGNFAKTVEKLRKSLNGISKVDDVVVPGRAGKTLTEVLKIDDVAYLKAAGKWPKNLDDIQEAKLV<br>REISTLDDQATLKLITKENAAEFKIEDMGFNPDMKLRMKQLSKNDKDYFDLVLLKHYYQYMAKHPTWA<br>SSL*                                                                                                                                                                                                                                                                                                                                                                                                                                                                                                                                                                                                                                              |
| >scaffold_29_F1<br>645 | MRVFSILLVAAATLVASASAESESKQRDLVSPAAPQWRTIAENEVPTKRNLRKKEIEEERAITAISLFDVVKA<br>KGLQALPYPELANLDSKLRQYKLLVNNLDRKQIVEITGQVPHYLTHGDKARRIVQYNKWWRKEPVPDP<br>WVLKNYPAFFKGYEEFFNNRFRTRGYKYA*                                                                                                                                                                                                                                                                                                                                                                                                                                                                                                                                                                                                                                                                                           |
| >scaffold_2_R17<br>01  | MRFSHFVFIAAAILLSSENAIADTPVEGQALMTETDAETPVRALSSNNDKRFRLRSYKEEEAYLTEDKYDEEKKR<br>EES*                                                                                                                                                                                                                                                                                                                                                                                                                                                                                                                                                                                                                                                                                                                                                                                           |
| >scaffold_29_R9<br>98  | MRLLYIAVVAILASTNVYPAAADA EVSSFTTERPHWDRSLTAATEGDNDGKRFRLRKRKTTTNETIRERSKQ<br>GSENTVSYCTACLHYP*                                                                                                                                                                                                                                                                                                                                                                                                                                                                                                                                                                                                                                                                                                                                                                                |
| >scaffold_9_F34<br>50  | MRFSHVLLLATAALISSCNATAIVPGEGQVTTSDAVVPVRALETRNGKRSRYYDAEEEDETKYDQKNGK<br>YDDDEEERVMTAAQIAKW TAKAGEWVEQGKTPAYIKDKLTA FNQVM SDKNKEYRFLATWGRAHPNEL<br>GRRYLRPEAESSPRFRKLIVFISNHLLDVLFCVTR*                                                                                                                                                                                                                                                                                                                                                                                                                                                                                                                                                                                                                                                                                       |
| >scaffold_6_F30<br>32  | MSAFLVAFRCCHVVFAFWELRSVEFALALGLNRARGSRWLRRLVAHLLSLYEAVLDGPGSASTSVAFMPIV*                                                                                                                                                                                                                                                                                                                                                                                                                                                                                                                                                                                                                                                                                                                                                                                                      |
| >scaffold_32_F2<br>41  | MSRAGSPVALVPPKTVLIVVNLPLVFERSETSASGWSVSWATGATAMLYRTLVRDADQYSPLFIGCEPVFV<br>AKSEEALEKQLRALRCVPVFLDPPVAHRYFQGFCKGVLWVVFHNVDVYNSAELQDCEENEGKRAKQW<br>FPGQKEDSSGVKSAWCDPVSWNPAAQDMCWSYCSVNRTVARRVVEHYHGDGLVWLHDFHFLMLPSYL<br>LRLRLTALVTMYLHVFPSSIEFRCLAMRTEILRAMLCADHIGFLTFEHARHFLTCKRLLGLDYKTCPNGMLVI<br>EYNGRKIHISCSHVDPVTHLHEMLDKNVAEVNGAALEFAAHVKNAIMAGRDSEQRRIVIGSVDRLEGLTAI<br>PLKLRAFDRFLATHPEKCSSVVLVQIGISLDRPNDYHRTRDNVLFTEEINRRYAPPGVVVVYFEERKTTCAE<br>RVILWRMCDIYLDTCVRGGLSLLPFEYMIQHRNIQSKAKNSAGTGWSSPRGTIDVGGLDRSFGIMIVSEFSA<br>YSRILSGSLAVNPWKTDMDV GALAKACGMSYIEKHNRFYMNKVFVGRSDSKPWGERLLTDVEAVTEKM<br>EDASTGEVVQVGFDFRVMRFESGFVCLDDELVKKCANTSRRFLIFDYGGTSSANILDEEGARFSHRPG<br>CVEQSAENADSSDRSGDCTGRSAARYVDGKVRKPISETRASLRTLCDVPCNIVFVTSNTQRGALEDQFDSI<br>PNLNLIAENGLFIRMGGQTRWECVCEEDKRSFGWKDDVKRVMEAYAARTNGSFLVENAASLLYDYNSSDQ<br>EYGEIQSLELCAQLRKIVEVCIKVILSSR* |
| >scaffold_399_R<br>2   | MRLTCILLVAAASLVGVLDA SAATTGNTVVANAAMVISPLAPESQGRRLRLVYDDEDDSADEKDEEEDSA<br>DKVDEERGWLSDKMALTS LASKFVGKSTDEMGEVIKLT PAQIDTIFDKGEDSIQKMLPGFYSGMDFQKFD<br>DLIRALPQEQQAVMLSAYTKYLHQNGRFS*                                                                                                                                                                                                                                                                                                                                                                                                                                                                                                                                                                                                                                                                                         |
| >scaffold_7_F17<br>75  | MRLVNVWSMLGLVLVLMVTEAFETTKGAKNGVTPDARRLLGFAADQEERRFGGPATGTDHSNSHAW<br>ENFKAWFKETFFFWRKWEQKRRRLRS*                                                                                                                                                                                                                                                                                                                                                                                                                                                                                                                                                                                                                                                                                                                                                                             |
| >scaffold_18_F2<br>220 | MQRRMSTPFFLMITTIGDAQGEVWVMI PADNSPLIKSDNFSRNCRATRRTRWATGVALPTSMSQTAPRA<br>AGGRAFPSPIRRCLRFQMICLNRSICSGVLPSASSIWCISILTSSVVALTSGSMAI*                                                                                                                                                                                                                                                                                                                                                                                                                                                                                                                                                                                                                                                                                                                                           |

|                        |                                                                                                                                                                                                                                                                                                                                                                                                                                                                                                                                                                                                                                                                                                 |
|------------------------|-------------------------------------------------------------------------------------------------------------------------------------------------------------------------------------------------------------------------------------------------------------------------------------------------------------------------------------------------------------------------------------------------------------------------------------------------------------------------------------------------------------------------------------------------------------------------------------------------------------------------------------------------------------------------------------------------|
| >scaffold_50_F2<br>79  | MRFLVFLALAIVALVADGEAKDSRLLRARSDEERGGGITVPVADKVAKLFQFSKLTDEQLQQWLSAGKTAES<br>VFYRMGLDNTFVTKVFKSPQFIRWLQYADDLSASGKGTSAISILSTKYGDEQLYKMGWAKKESSTEALGLRL<br>QSEQLDHWVVKVGDPEVFKLYDLNYAGSRILSTSQFSAWTKYVDDLNAKNEGAFVSIPTLRKHFSDDDEL<br>HIVLAAKRSGETEAMGMKLEDAFVQFWIHRKETPGNVLVGLGLKSMETLLESPLLSILTKEYEVYVNVYAAK<br>KTTVIETLRTFGDDKVARMLLAGRTESTTTKIAKQFQTDQLEMWLLSSGQSVDDVYKLLKLPYRDLVADIGTN<br>KFLGTWLTFMNAVSLKNPEKMSAIFTRLEPTFGNRPMMQILEAANKLPSMEKAATKLQLEKAQRIFSTGESP<br>YQLFKLVALDDVGESVLSPLFKKWMLYVEDFNKNPSDEVSWFVALRAGYQDDKLGPIIDKAMKDPKTMK<br>LAKLVEKERMKEWLEKWKRPPSMAFRELHLNKAGEKVFSAKPFELWVKYLDLWVQAYPSKTTMIDAFVD<br>NYHMSTLVPMLAAAEKVPITKKLASQLKDALVDKWIAEKESLAYVKS WLKVPSSDDMLERFTKKLNSA* |
| >scaffold_7_R19<br>03  | MSVLCLALMLAMVTGAFETSRDVKNGVVTSSRLLGFTADQEERRFGGPATGTDHNSHTWENFKAWF<br>KKTFFFWRKREQTRRLRN*                                                                                                                                                                                                                                                                                                                                                                                                                                                                                                                                                                                                       |
| >scaffold_24_F3<br>57  | MRLSFLLLVAAVALLSSGTVVSAMTNDPEISTPNQVLSSETTEGRKLRMHNIASDDTEERGFNAQKFEQLMD<br>DGTYSKRFRANWVTKRYTDTDIYNKLQISSNPYKRIKLNKYQTYIEHFAPGLISP*                                                                                                                                                                                                                                                                                                                                                                                                                                                                                                                                                            |
| >scaffold_17_F3<br>59  | MAANSCVAVLVLCGLPGAGKTLVKQLVATACSISSRLHERISFDDLYEQHVTAEGKPGFEFDPKWKMCQ<br>QDMLKRVSNRLKEQNDPVHRNECNQLVLLVDDNFQYRSLRKRFFHLTAKRRRPSGFTLCTTTGMPLMTRSE<br>LWFWCALCGCSFRYLSGTECWSKQTRTSTQ*                                                                                                                                                                                                                                                                                                                                                                                                                                                                                                             |
| >scaffold_8_R31<br>93  | MRLSFLLPVAMAAIYCATCNATADSDQNKMSTVHSLDARLNDEAGGRRFLRVNQEEDVDAEERGFYFEKA<br>AVKKMAKAIMADPSKADEVYNTWAEKGYTSLKMSEYLKAKKYDQVYNGYALHLDI*                                                                                                                                                                                                                                                                                                                                                                                                                                                                                                                                                              |
| >scaffold_83_F3<br>73  | MHPPSLVLTVLSPAALKSSTLHVALELQDTPVSSHASEPFSFPRCRRPLRVASSTCAKAGADPLLAPNGH<br>LK*                                                                                                                                                                                                                                                                                                                                                                                                                                                                                                                                                                                                                   |
| >scaffold_25_F1<br>083 | MRLSFLLPVAMVAIYCATCNANVDSNQNKASMLQARLNDEAGGTRLLRVHHESDTEERGFLEKAAVKKMA<br>KAIMADPNKADEVYKWKWADKGYTLTQMSNFLKSKTAGKYDRVYNGYVIHLDY*                                                                                                                                                                                                                                                                                                                                                                                                                                                                                                                                                                |
| >scaffold_22_F1<br>823 | MRLTFLFAAMLAASFSTSDAASVDQTTGVRSLRRYQAEDEERGVTSVSTSIDDVLNNLIKQKSSLSKLISQK<br>LDNMLTKNFIKLLRSNKSYTDEVFTKATLNKMLTSEKFAEKKFVEWYALGLTDKILQLRNLNGVGEHFGLTHSQ<br>YVTFINRIHGVA*                                                                                                                                                                                                                                                                                                                                                                                                                                                                                                                         |
| >scaffold_157_F<br>14  | MRVASIALLAVVTALASVTDSSAATTGTVLAKVVSNEAAPSVEHEHATRFLRKHKDHADTEREERNGISLQ<br>GLKSTFEKVADLPFDRAWHHLQMLNLSWDKREALLKHLRLSAKDREAVLKIT*                                                                                                                                                                                                                                                                                                                                                                                                                                                                                                                                                                |
| >scaffold_7_F23<br>10  | MISRFTLITAGVMASSTLIHASPLQYDPYTPVNISTPLTSSHPAYGAQTEGCIPIVPEDPNQAKAESMIIQAD<br>IYRKLRSMEDTTNSDIQDLETYFGTKMEVNFQTLKQQYSSGHAPATPWASSYWPWFQDSINYVWKTGEP<br>SA<br>SEKYATAYGLNVTEFKDKISERSGVSRRRSTRCTADSDCKDGSVCGKRDGISSGYCIPGWFGICHAWAPAAI<br>LEPEPQCDVTKNNVTFHVM DIKGLVTSIYDGAIEKTVFTGARFSGLDSPANKDQYGRFTDAARRDLGPGYFH<br>IAITNVMAKQNRSFVVDVTAGSEVWNQPVRSFNVQSMDLVDTRVASMQYFGVPSYPFNDK MVRLAYVKT<br>TFSWVSESYKDGPLVSSGRIDRYTESKDYELLELDADYNIIGGEVWVQSKDEHPDFWLPTAKPSASAVTST<br>GLKYADVQELLNLSQSC*                                                                                                                                                                                                    |
| >scaffold_39_R8<br>34  | MPVLPRLSLAGSSSCGAQVLSLLALLDASSAQYASLPSFDELFPYLYLLLHALVKLEDTKVSEVNAVISKLH<br>NRLETCWNARRPLRLQTFAPTILPTFAPQFDENYTVRKDKTAPKDTAQLKQLQRQVKRARKGAARELRRDA<br>EFIHREKQKEEEARLSAKEEKQKEIRRWLEEQNATFNQQVRKGGHMLKGGGSARGPAPRARTPRK*                                                                                                                                                                                                                                                                                                                                                                                                                                                                       |
| >scaffold_104_R<br>20  | MRLTSILAAVVVTLHTSATAFPAVKDTAAIENGAVADIVDSSVTGGRMLRVNYNDDDDLDLDDKKKTRN<br>SEDPLDNYDEEERVGIVEALKKLNVPVTAANKS AKKLQSTLRRSRK*                                                                                                                                                                                                                                                                                                                                                                                                                                                                                                                                                                       |
| >scaffold_61_R5<br>21  | MKVTKVVVALAALCVLWTSPTDSEDISNILEVSASRHLRQTSAEFAAKPQETGKKRDSTNPLQRRDQALVS<br>AHRVYDPVSGLACSLVGEVACVQSERDESFCRETGYRQELDCPRPNDPKDEALLTKPEDERETRFKACSPA<br>DSARPGVAVVKFELLMAAVLAASVLLRRERRNHMSSFDLRKDPRQRTGLLGGNSDKSSD*                                                                                                                                                                                                                                                                                                                                                                                                                                                                              |
| >scaffold_90_R9<br>4   | MANLYKLFVTLVLVSWGSKVSVCCLTSLRFLRTQNLKTRYLAKSTSCFQC GSGHHLPLRHYAVSVSQLASLN<br>LRLACC*                                                                                                                                                                                                                                                                                                                                                                                                                                                                                                                                                                                                            |
| >scaffold_25_R3<br>32  | MYRVLLLVTFALLCGFSNAANSGRLLRVVDSAEERGGFTSYLMDSF TKWRINSKINSWVNKQKTDEYVLAK<br>LGLSTLTGKELVKAAYPQFQDFKVGVLKEATPTTSVSTLGLDKVEGAVEKADDFGTYYKVMALGEKAD<br>DYPITRWRELFGGGSPEQLKLRQLLFLAKRNAIDIRIMLG*                                                                                                                                                                                                                                                                                                                                                                                                                                                                                                   |
| >scaffold_18_F2<br>130 | MRPNLVVLA AVIALVSRCTAVSADSSTNLNQALDTLQNHAGDGNRFLRSANIVDDRVDIDSDDAIDNDDE<br>ERGEKLGRLNLPNGMRAERPQTSTKGS HSSLTYAKRTNMAKSDGSITTSTIASGPITWPS*                                                                                                                                                                                                                                                                                                                                                                                                                                                                                                                                                       |
| >scaffold_74_F6<br>12  | MVFIAPKLTAEQALVIISCLLAARGNRKRFLRTMHFLIASHASVFETHLLGSTQATASTTPLTTRRHGHASILR<br>YLSYDC*                                                                                                                                                                                                                                                                                                                                                                                                                                                                                                                                                                                                           |
| >scaffold_37_F1        | MGLLQKVKTMMIPTVALSLTATRIGVPSVLAARAVPTQTHQPLLRRAKLIRELRQGINVSRLLVAKSPRIRL                                                                                                                                                                                                                                                                                                                                                                                                                                                                                                                                                                                                                        |

|                        |                                                                                                                                                                                                                                                                                                                                                                                                                                                                                                                                                                                              |
|------------------------|----------------------------------------------------------------------------------------------------------------------------------------------------------------------------------------------------------------------------------------------------------------------------------------------------------------------------------------------------------------------------------------------------------------------------------------------------------------------------------------------------------------------------------------------------------------------------------------------|
| 084                    | QGHLRAVVRYRTRRMIL*                                                                                                                                                                                                                                                                                                                                                                                                                                                                                                                                                                           |
| >scaffold_11_F1<br>319 | MRIGYVTLTATTAILASFGNVSGDSDLTQVVKVASLDAVLPNTNRLRGRKNNEEMEERNGFEALAAKL<br>DKSVLPAILKVANLDLGRAALTQLRIPFEQLAIQALLRLSKDRKAVLLLIK*                                                                                                                                                                                                                                                                                                                                                                                                                                                                 |
| >scaffold_11_R2<br>801 | MKWCRASSASLALLACSLAGLQDQAADRWTVHTVQRTRSAEELVHEGTSRWPGDAGAVASVTCPSDLLL<br>ALQCREADGQRELRRDDQDLRRLTRMCMCCADHRRIKSGGLFALYMKASVRLTANCDRYELDAPLVSTLTC<br>RSVDKDIHLLPDKEPL*                                                                                                                                                                                                                                                                                                                                                                                                                        |
| >scaffold_11_F2<br>657 | MQRMMSTPFFLMITTIGDAQGEVEVVMIPADNSPLIKSDNFSRNCGATRRTRWATGVALPTSMSQTAPRA<br>AGGRAFPFPIRRCLRFQMICLNRSICSGVLPASSIWMSSILTSSVVALTSGSMAI*                                                                                                                                                                                                                                                                                                                                                                                                                                                           |
| >scaffold_50_R1<br>378 | MGLFYLVCAILAFMAGDSTGDRVIVSDGFNQHRENAARASVSTTRLLRTKSVIDEERVGGIPVSATDKLAK<br>FLKPSKVTDKQLQEWLRNGKTAESVFYRMLNLPSTKYLFEDLQFTRWLKYADDLSASGKGASAVISLSAKY<br>GDEILYLMIDRAMQEQSALGIRLQADQLAHWVKVRKDPDEVFKLYDLNYAGRGILSNQFNAWTKYVDD<br>LSAKNEGAFVSIIPTRKYYSDDNLIKIALAAKEVDETEAMGMKLEDAFVQFVIHRKETPDNVLDLGLKSTK<br>TLLKNPLNLTKEYTEAYNVNYPMSRMTTVIETLRTFSDEVMAKTFLAGRTEYTTKIAKQFQTDQLEMWLSGG<br>QSVDDVYKLLSLPPRNSLDFGNQKLFDTWLTFMNAVSIKNPKDTSIAFTTLAPTFNDRPMMQILEAAKFP<br>SMEKAATKLQLEKASIFSTGVSPYTAFRMVALDDVGESVSSPLFKKWMMLRPDRYHLMASHLCCRPAAQ<br>HFLKRPRRRDVCGGNSCVLPRYVVRGRGVAGVALLCRKPNEQLLLLSTTDC* |
| >scaffold_17_F2<br>587 | MIVYTGTLVTTLVAFVATVCLETEHTACVLSNDLGISSSTAQVLGLSLWGSVHLEQVEQSPFSRQLHGHVVA<br>LDQLEDGRYKGHQVFARLLRGALSRLNHAQRATDHVLLVLRHTLHQYWD*                                                                                                                                                                                                                                                                                                                                                                                                                                                               |
| >scaffold_25_F1<br>282 | MRLSFLPAAMAAYCATCNATSDQNKMSMVQSLDARLNGQADGTRFLRAHHESEESDREERGFTDLFK<br>NEKAAVKKMAKAIMADPSKADEVYNTWAACKYTLTQLSNFLKSKTAGKYDRVYNGYALHLDY*                                                                                                                                                                                                                                                                                                                                                                                                                                                       |
| >scaffold_68_R3<br>1   | MRLNLAVLAAVIALVSRCTAVSAASSTNQJNLSNLNQAINTMPNHAGDGNRLRTAKIVDDSEDDIDSDDDI<br>DRDEEERGGKTWAEKFAKWHARGESADDVYQRFALPEVVRQAYKYGQIGRLDDNEYRKYWAAYSA                                                                                                                                                                                                                                                                                                                                                                                                                                                 |
| >scaffold_11_F1<br>227 | MKLSMLVLALVCISQLGGSSANEATDIMRRQLRVGKAVASLFENQHQSTRELEENIMQDEDNKPNEVQAEF<br>TKFRMRRLRSYVELIE*                                                                                                                                                                                                                                                                                                                                                                                                                                                                                                 |
| >scaffold_117_F<br>62  | MLRSVGGAHFDVHIVSLLFLLHGFSTHTLELLVANVQSQGIETSECEVDDQNGNTEPNVARALIDREALEL<br>SFALSISVSVTRELHQHIGT*                                                                                                                                                                                                                                                                                                                                                                                                                                                                                             |
| >scaffold_53_F9<br>79  | MRLSVILLAVFALSSSVSATRNHPGETATANTAMQGVDMRTDTNQMRFLRTEADDDEERLAGKNMNFN<br>AEKIEKALQDTSYAKTLFRRWKRYEVEHGAADFCLKIFNIGKDDKVFGLYKSYVSWLEKHHPLGAETGGGPNL<br>FSKAKLKDAMKDPKYENTMFGRWKRQGFESDAAYNKLLAFNLASDADVYKIYKYVTWLNIIHPLAKTRKT<br>TAKDFLFNVDRIRAKKDSEFAETLFKWKTSGLDEKPVYKLWDMGLKTDELYKLYKNYVKWLDIHYPLP<br>AKAT*                                                                                                                                                                                                                                                                                 |
| >scaffold_22_F2<br>097 | MGGLRRPALLWIPHFLVADANCNAAVEIDFKSGRILRDIDYAVISDEFARVAISRSTFAVVSVPKVFNRNDEE<br>GTGIVDRVRLMLHPTDLSSSRFQDVKLSFTLVRDVTNYCREAEVRLRQAREIDGQLPCLTMHSFQLNIRE<br>NFSLNLHISEGHRVFRWPPPTAEVLLTHVEIPLDNLQESVTYPAFMEIPIHAVVGKTPAQKRTAVNSADTK<br>TPNTEQLFQRDWAVVPIRLDSKAELDVAPPSPSIERTSTYLVDLKTANEGDPTRMTVEQKEFTPYFYV<br>EMAFSPTFWCRYDQTWVFDKTKKVLDMYQVVHRGFDTKVMISTSAYAGCVRVARCSIDCLENVHLF<br>FCHHPYISKAIICLVKISQPTLLKWMMPRAADCITYLKSFKLIIPS*                                                                                                                                                              |
| >scaffold_13_R9<br>5   | MRLFWTLLVALVALSSCDAASVDENKALQRKLYTKVASQALAADNRHGKRALGESSKIAPSSVTEARAAT<br>VSTGFSGKIMAFRAIKEKYLKWEQKILAPSFKEKAEGTTYSEVLANYRTRLNWSGLWGTPSGFKRYARLYE<br>TWLKNPNKYSHLAV*                                                                                                                                                                                                                                                                                                                                                                                                                         |
| >scaffold_73_R3<br>02  | MSSRGHFFSTAFPILAACKFQVSSSPFPHVALPFGSFLMSIANTFHAPGSLQYLVASLVSAGVMSSGTATSG<br>KSGSDASMRWLSNMMRMLRRLRASLTITSRTSR*                                                                                                                                                                                                                                                                                                                                                                                                                                                                               |
| >scaffold_25_F1<br>407 | MRLSFLSVAMAVIYCATCNATVDSQNKVSMVQSLDARLNGQADGTRLLRTHHENEQESDREERGLTDL<br>FKTEKAAVKKMAKAIMADPSKADEVYMKWEAKKYTLTQMSNFLKSKTKGKYDQVYNGYVIHLDH*                                                                                                                                                                                                                                                                                                                                                                                                                                                    |
| >scaffold_60_F3<br>66  | MLIHATTICHVVWLVLQLANGFATFVTMEMKTLTITRLLRRATAKETRNTCTWIASAGITIWMRTERTRRR<br>CVPSPIQMAWTCASARRPT*                                                                                                                                                                                                                                                                                                                                                                                                                                                                                              |
| >scaffold_5_R26<br>54  | MRPYFLLLAVLLAISNQLRPADQSIGPLKTRRSLRLAKKSDTSNEKEDERLGLSSLKTEIKKVPLKVKLAWWQ<br>HFVGGPSEYVKKLGANHPLYLYRHTREGLEMWSWLAEAIRHTKSGKGLMAWSHCMNLDQIARQIKK<br>PEGTEPFRVYKRYAKEFDGHRLLSSDITYFIDESASVAGRYARAHWAESKVDKEYVLEFLGLLYMKPIYVKHNPY<br>YQYCSASSVLVAMVIKVFVEVHGRVEA*                                                                                                                                                                                                                                                                                                                               |
| >scaffold_13_F1<br>424 | MLGLPLAILELLHCHVVLAHMSGLTSQNILVSNFTFCKKQKLHVCSRLRLPDTNSRGGRIIPRTARAQVCAG<br>ADQEQGEADPEPTGADPSTYQQAETLGCGEGLTF*                                                                                                                                                                                                                                                                                                                                                                                                                                                                              |



|                        |                                                                                                                                                                                                                                                    |
|------------------------|----------------------------------------------------------------------------------------------------------------------------------------------------------------------------------------------------------------------------------------------------|
| >scaffold_7_F13<br>78  | MSVLCLALMLAMATGAFESTGDAKNGVVTSSRLLGFTADQEERKFGGPATGTDVNSHAWENFKAWF<br>KKTFFFWRKREQTRRLRI*                                                                                                                                                          |
| >scaffold_24_R3<br>31  | MVLFSFCLVYIILCCYAEKIRPLTLGQDRRLRCAVIAFPVHEKQRSEDEVDITIPKVFLAKGSSVEMLWHFCAIS<br>ADRRTLFLQRGSLRLRLISRPFLECAWGIPTFLDVVPAAPARWRRRTSRAQNRRAIRPREVAVRLDQGG<br>QIGFKEKIKPSPVARTRAKGNDEKECVLHDIRDKFHQLLHVLR*                                               |
| >scaffold_11_F9<br>7   | MPTSRPCSWLHPAALCPVVFPMMLPLLDLDCREFSNGPFNLAYVIAVGSSEPTPIPTTARMCRSGQTPFCP<br>KFRLGCPFFIFSLNCRGRHPHHRALFHRCLRHFLHYPRRHCPRRWQCPRSVRTS*                                                                                                                 |
| >scaffold_6_R29<br>10  | MVSFFLPFFLFLAFVFFTFSCSSPHHDNEPPSRTDRSTPRSSGQPDLHPLRRLRGKSGSGTARRCILPGQTPSD<br>ASKDVPLRPPPHAS*                                                                                                                                                      |
| >scaffold_25_R1<br>205 | MRITYILAVTVAATLHSSVTAIPSVKSSKATENGAVPAVIDSTHTGTGRMLRWVNKYEGDLDKYEGDLDDN<br>DDLDDDDLEEERGFSDTLKKNPLKLVKKGTKLTAEQAAKVQALKDAADYQKMIENANKLIRSD*                                                                                                        |
| >scaffold_12_F7<br>09  | MRASKLLMLTVFLLASLDATSGYNKLGQNTTEVVDGTQRGVNSERLLRGHPSTVDKVSADDEERASLPTFLK<br>KSTSGATNWLKDKKLAALKLRALPMNLDSVQKTMKDGIDPDRVFTLLNLQKKS                                                                                                                  |
| >scaffold_12_F2<br>959 | MRLISIVLAVATIFACCGAPTVDSDKSIQVPHHVQTENNANRLLRVHQDEEERTGAQLVKSLEKFSKKA<br>AEKLTRSKSFNDFVKLDDVAYKENFHSATQALYQRIEKMGNPDGMLKTMKRKGDVLDLLAEYTRYWMK<br>KYPTWTKNQ*                                                                                        |
| >scaffold_5_F36<br>83  | MFCGVLIVALVQSLFFNFLDLSPEKRVRYLIELEWWEKATRQNAAKLLQTAWRSGNLRRTDIDGQCHLFS<br>LMRTARRLRIDKPAIELSVEDQVAEMEATILAEVDRMEAQKVKVLRQIQAQATQLATLKHKLQMKKKK*                                                                                                    |
| >scaffold_495_R<br>1   | MRLSLLVAAAVLVANSDAAPQSTSLTKFSTDVAPVRSRSGASKTKTEVDEDDSDPDEEEERGIAMYGLDK<br>VDDILKQLNLADDSVIKLLAKGKGGVEQLITTDKGVKTLVITSKKTGKKVFTFNIDIENIRKIESTPAIK                                                                                                   |
| >scaffold_536_R<br>3   | MVLMLVSAVCMCSCLLYCAAQRLVNPQQLPTGVMVCRHLRWNHWSRRDALTALQASDTLQDATYAKGA<br>SACEVTKLCELVSSCRRRGDAGSRLCPA*                                                                                                                                              |
| >scaffold_5_F17<br>32  | MALGVAMAITLGLLSLVSNNTAVGTENAVGPVTRHLRSLLDQKVSEHGAALDQQPLAASMEATSRRSVPQ<br>NPGGPLGGGRTMEAIAPRYEKKAAPETIAEAVAKAEAEIEEALIVALGAENDLQAEIAITEASILSLATNSIT<br>EGLGGEEIVVGEIEDSDSDSSDQEEHTTRTKAKKHKDW*                                                     |
| >scaffold_1_F44<br>48  | MNCSQQSRLLFSLAFCQHSRLIFALVFSQQSRLQCVYDDRILPDEHLRAIRRDVSPSLYSRDLRRPSNAP*                                                                                                                                                                            |
| >scaffold_53_F9<br>2   | MRLGYFLLATIVGFLACDNATASVSESTSKLTAREEHPIHGRIGDFTAGHDNKRALRSEDEDDGADDSDEE<br>RDLILSTIHRPKYWRWFKAGMTPYAVQVGLTGVRRLLWPKFKRREYKGYVVFYTEQCHKPEYHDFCKKHA<br>DP*                                                                                           |
| >scaffold_12_R4<br>2   | MRLTSIVLVAAVSIFVCCQALADSDSKSISVPQHVVHTENANRLLRVHQDEEERAGPQLVKSLEKFSKKA<br>AEKLTRSKSFNDFKLLDDVAYKENFHSATQALYQRIEKMGNPDGMLKTMKRKGDVLDLLAEYTRYWMR<br>KYPTWTKNQ*                                                                                       |
| >scaffold_3_R28<br>40  | MMALLLVGAPWLLPLMLPLPRFDLAPDVTLTPRERALRFSSLRILPSLISSLANLFTLLRLPMTAPPRGFLPLR<br>*                                                                                                                                                                    |
| >scaffold_68_R5<br>30  | MKTIIASLLTAVAVNAANGDVNALSIASTISDAKQVSIRALRAAHGSHEHSSGMGSMEDSHDTTSSSTHESTV<br>AGDDDDDDHSDHDTSSKSSMAGTAGSAGPSNSTESTQAPDTSSAASITVAAGSIFLAAAAAFL*                                                                                                      |
| >scaffold_24_F1<br>366 | MRLLLVVALTLAAFLAAADVSALNDAPSKRLLRSTVRVDEEEERGMWETLSSKVTKLIKPNQVAIKAMDDPKI<br>AEVAGTSLTSLKSVNPKKFDSVDGLFSSKAFNNLENYVLRNLNKQDINKQTSVAKVFSTGLGDKQAFHLFFTA<br>TQSSDSAVEKSGRFFRDQLLTQWATEGKTWTEVSKSVKGLPATYYPRENKYFDILFNLAHDTQKRAARLA<br>RLEKARMAANTAA* |
| >scaffold_77_R3<br>94  | MRLTYIALVIAATLHASGTAISTDKSVKIPAIADDAGRMLRIVKEKPVSDKEAEREERFANPIKKGAFLLKKK<br>WDKQTLKEAIKRDENRRKWIREQGFEPD*                                                                                                                                         |
| >scaffold_5_R20<br>89  | MRLSFVLPVAVIATFASSGNAVATADGRNTGLSAITPPNVVASIDTAVGGEKRSRHYHNNKDLEDDSDDEG<br>LEDAEEERRGNMFSATKLEMDLGDGKQVMSRFKKWKAFGYNTYNLPDAIQARKYDELKMYRKFLYYN*                                                                                                    |
| >scaffold_12_R9<br>67  | MRLQFAVLFALSIVITAANGFSETTAQQFNELSTGEKQHDEKRILRTEKVEDEDEEGTEGEERVQVSPVSWII<br>DLFTPKTAEQIAEAAKAEAVKFYTKLANSPSFRAPERFNWKIDGMQVESVLVHLKLWGLDGEKFKAIATKYT<br>EFLASGKLS*                                                                                |
| >scaffold_535_F<br>2   | MRLTCILLVAAASLVGVLDASAATTGNTVVANAAMVISPLAPESQGRSLRLVYDDEDDSADEKDEEEESA<br>DKVDEERGWLSDKMALTSVSKFVKGSTDEMGEVIKLTTPAQIDTIFDKGEDSIQKMLPGFYSGMDFQKFD<br>DLIRALPQEQQAVMLSAYTKYLHQNGRFS*                                                                 |
| >scaffold_29_F1        | MRVFSIFLLVAAATLVASASTESESKQRLDNSPAAPQWRTITENEVPTKRNLKRRKKIEERATTAISLFDDAVK                                                                                                                                                                         |

|                        |                                                                                                                                                                                                                                                                                                                                                                                                                                                                                                                                                                                                                                                                                                                                                                           |
|------------------------|---------------------------------------------------------------------------------------------------------------------------------------------------------------------------------------------------------------------------------------------------------------------------------------------------------------------------------------------------------------------------------------------------------------------------------------------------------------------------------------------------------------------------------------------------------------------------------------------------------------------------------------------------------------------------------------------------------------------------------------------------------------------------|
| 837                    | AKGWQVLPYAELANLDATVRTQYLKLLVNNLERKQIVELTGQVPRYVLKHGDSKATRLVQYNKWIFNHFKE<br>AVDPAWVLKNYPAFFKGYDKFYQNRFRGYKYA*                                                                                                                                                                                                                                                                                                                                                                                                                                                                                                                                                                                                                                                              |
| >scaffold_11_F1<br>676 | MRLPHFLLVATATFLSSYNSTATVSTEGQMMPADAAVPRALEANDGKRFLRYKKEDMYDENDGDDDDV<br>DDDDKYDEEVEERGVMATQVAKWTDKANKWVRLKETLVTIKEKLTNMKGVISAKNREKYNLFTAVYGRA<br>NPHVFERL*                                                                                                                                                                                                                                                                                                                                                                                                                                                                                                                                                                                                                |
| >scaffold_31_F1<br>184 | MRFGLFLALLVATFVACSTVANAESVALTLDNEVRRRLRNQQNIAKAAGDFISKSSESATLTKAINIAKTANG<br>DEAAARRAVMLAAGAKEGAKLSDETMVKLSAMIAESAKKNPKSWPRLKFKVKITLGIQVGLAIYGAYKLLF<br>DKGSSTAAATTTTTTSSGAA*                                                                                                                                                                                                                                                                                                                                                                                                                                                                                                                                                                                             |
| >scaffold_40_R1<br>072 | MAFSSFLKFLAMATLLMVQVNAEPSQQRNLRISDLPQEQARRLGNWALVINVKNPVGSDGVMK<br>LLKADLITGTSSKIKIEKVKDAAEKVKNSAGVKDKVTGN*                                                                                                                                                                                                                                                                                                                                                                                                                                                                                                                                                                                                                                                               |
| >scaffold_62_R1<br>2   | MRVTQTLFAIAVVLFAATDNLTTASKATTSSKVQKDGLYAEIYNVEDGVVTKMRVPLGDVEQYSDTDFEQL<br>KSTLTTEERAAVHLPFGVDSFFKGLEKVFVGFVKGRRLRIEEA*                                                                                                                                                                                                                                                                                                                                                                                                                                                                                                                                                                                                                                                   |
| >scaffold_4_R32<br>84  | MVKCAFVVGLVMALASGENNVVDVGDVGGNGVKTEAVVRVNAVESLRFVFLDAIINRSVVLEHSRETRD<br>LRVLSIEREGVVEVEVDAATVSSCNATTACPPENVNDEIDENSVPPLSQQTDRLVLDGENVSTLSFQD<br>VIDSAAGSVAVLPLFKPIGSAHVLSGFARVEILSPKLEFPAIPEREQVVMAWIEEKARLKAEREAREIANN<br>KELQERLEKERLLAEALAKKEEELLAKLDREYERTRMTPHNLAAGKRRDGFWEFVEFEKTKGPIGLNWDL<br>NTRDKAVVSHLEPELPAQQLNVIAPRDQIISLNGVDTSKMGPPQEVVEVYLSAIPKRMVFLVQMSAERAAK<br>SAEKNPVKRVVMNWTAFDAPEVLRGWEVRLHLASWSVPPQINETNASLPLQFELPTPITGCSFVPVQSS<br>NETAGVVYLAYRGACTLVEKAKNARTANGSALLIVNANGEGRFTPSGTVVVERVDVPTLYESTFVFIRCIW<br>NLICGVCTAG*                                                                                                                                                                                                                          |
| >scaffold_211_R<br>6   | MRLSQVLVIAVASFVFASDTVATSNQAKISKTVQSSQSQRLLRSNHYPVKEEEDSESDVDFEERGFTTPDEE<br>DLEERSPLSAAIVEKLDDIASRWGTSWAAMGQSSISEDKIKALLALRDAYLSGNKNAKAAAKLAILRANWT<br>RSQQKW*                                                                                                                                                                                                                                                                                                                                                                                                                                                                                                                                                                                                            |
| >scaffold_80_F4<br>73  | MSFSLFCFTQLLWSCNFQTVKAVFEAYAQTYVRIPPEGTVVFSTALPTCTWKSTDSVFSFITRILRF*                                                                                                                                                                                                                                                                                                                                                                                                                                                                                                                                                                                                                                                                                                      |
| >scaffold_62_R7<br>23  | MIGCKSLISRWPTFFLTLAADSIWSDFFVACNPQLTDQARHLNSRERKRYLREYPGIARHFHRRFKAFFFL<br>QHLLWKRSSSWGNCRLLLAR*                                                                                                                                                                                                                                                                                                                                                                                                                                                                                                                                                                                                                                                                          |
| >scaffold_1_F54<br>50  | MKTATTFATVLALIVATNAAQVSPHTPALRGLRLTADTPSVEDDKEDRKHDDHHVKKVKKIAIPVVPVVEVPQF<br>IPVVPVSPSTVVASSNNAVGPSTNVAGPGAAAPGAPGAVTPAPTTLNRPAAATPAATSTRSRPTPA<br>PTNFAGARPSGAQLPAAPVQVGAPGMTGFPNSAGVDNTNNAFAGIGAGGFPMTGNLAGGFGFR<br>NPMNGFGGANGMGGGIFGGAGAGPAMGGNGFGGNGLGGFGGQAAMNFGQAGNNGFEGGQGGF<br>GSGFNRRERHRRR*                                                                                                                                                                                                                                                                                                                                                                                                                                                                   |
| >scaffold_26_R1<br>820 | MAAIKISWQPGCFPPVALSYLVVWSELCAANRRMVWIRRSRFRGKTRLRSPYLTEHKLCMFHVFMHFFYL<br>N*                                                                                                                                                                                                                                                                                                                                                                                                                                                                                                                                                                                                                                                                                              |
| >scaffold_52_R8        | MSALRAQIYLFVVARAAVDGQVQVCLVAVQQDLVRARAIRLATTNHVHQRLISTRPPQSRHQARRRESAH<br>TLQQVQGLFRALRVRHGVQKVLERHHNHERRAANRRFALLRVVYFYGILVQNDGRILLDR*                                                                                                                                                                                                                                                                                                                                                                                                                                                                                                                                                                                                                                   |
| >scaffold_33_F2<br>96  | MGVWFCAIILLIMASMSIPDPYGDPAHMSIDEEDWTDQIDSINADAPNSAGKYVPMMLASFGLMCE<br>LQQMPWWSSTHNENRSNNVAFAKPPFTPSKRRSLRSELLSRSS*                                                                                                                                                                                                                                                                                                                                                                                                                                                                                                                                                                                                                                                        |
| >scaffold_16_F1<br>464 | MRFSQLVIAAVSLLFANDTVAVATSNHAAISKTVQSSQSQRLLRSNKYLVDEEEDQSESDVDFEERGGGKS<br>HPLTNRKLRSLKQSLVGEELLIRELLWVSQASRPRLMRCLPCETRTCFATGLLSRQQR*                                                                                                                                                                                                                                                                                                                                                                                                                                                                                                                                                                                                                                    |
| >scaffold_2_R38<br>99  | MRLQSIVLIVATLVATTQATTKLNAPSSETVDISPQRFLRKHHTQNDEERGAASLIEKAKRVFPKITDKTLQR<br>WANKKSPKQALTRLKLDIPGRTSLRSLSSASGPLSWPSATRTPPKRWSRLYWRNTAMRP*                                                                                                                                                                                                                                                                                                                                                                                                                                                                                                                                                                                                                                 |
| >scaffold_28_F9<br>19  | MDTCLSVLLSLVVSACSSQALPEVLNASVEMASVTVSLYGVGTPSLISRWLRAIAEFYDYPISQLLDDHFCGL<br>WHRFISASHRPVPQEEENSTGWMKNSQLAPLPNGHSLQQFPLCILLGEEPMNTQETHFAKMLDKIVPIG<br>VLHSFISGDMSENGDRFKFVDEILSCFPVDDMNAERKIDFGAQLTDLFAFSFMLLVYDPDLKQLAQQM<br>VDIAEERAHGNTLQLSHLGHIAASKMARFTVWNIQGCDEDLVTQSDLWRDALKMMKEKYSAFDWKLLNIA<br>DLLGEFVYLLRTEHIDPRAVCAVECFKIFVEETRDVAESSLVQLLQSICFQSIKRLAVRNRNRIGRVLVLLVRE<br>NCEYFMKSTDKFGKYLGFVVQEISDILSKCNASSQTRNSVSGALSVSADDQAELEWVIFAVCNELGSGLGKH<br>ALDIDMVDGISSSLDKLNALISSRKVVSSETSQSEERKKNLSQSAMGTRNQAIQILMFIQREQSRGAQFY<br>NPHPFSGTASAISETYVNAATQSPAGSLADVRLSAVTTCIDMVRDSSQSTMKLYGKLAQTLVYSSSGTFTGT<br>SRYNCEAASLANTLGQLGALHASEYVSPAEEGELSRLYWRHFHREGALREIKTTFGLVMHENVLYLSSL<br>LFEGTRFGHVDPTVVEETLKTQLTVLNLEEGLAALARSKDNELKAFKPFESSSPSNWSSSYSSSGGDWGVKP |

|                        |                                                                                                                                                                                                                                                                                                                                                                                                                                                                                                                                                                                                                                                                                                                                                                                                                                                                                                                                                                                                                                                                                                                                                                                                                                                                                                                                                                                                                                                                                   |
|------------------------|-----------------------------------------------------------------------------------------------------------------------------------------------------------------------------------------------------------------------------------------------------------------------------------------------------------------------------------------------------------------------------------------------------------------------------------------------------------------------------------------------------------------------------------------------------------------------------------------------------------------------------------------------------------------------------------------------------------------------------------------------------------------------------------------------------------------------------------------------------------------------------------------------------------------------------------------------------------------------------------------------------------------------------------------------------------------------------------------------------------------------------------------------------------------------------------------------------------------------------------------------------------------------------------------------------------------------------------------------------------------------------------------------------------------------------------------------------------------------------------|
|                        | KRTFRQFLKHWTSAEELGFEAWVRSCLAARESSDPVLKACALSAMRVDMAVFLFPYALERILRLDNRDV<br>DNPDEEKSSGVSEPSRIMKAANQGIRFVLGTGSDALSHHVLASLDGTQRESEFSQPPEAVQLVVHSINFLR<br>ETEKAQFVETNGRGPQTVSTIKGKGSRRSSTYTAASIGRQHLNDLAYGCLVDVDFLAVAKAAVRVKMPYSA<br>MQYVEMWLEKKQGGKITSLSLDRDGMVDTVRDILVEAYSFDSDDDGIYGVNDGRTVKSQLVKYNREGLH<br>ARALPLYDVSQFSSQQLVSTDELTLNTPRRLVEGILTSLSLQSLGYNHLLTGYLQSLQSGDVAGNKSQTIAIQA<br>EHKYKLAWKSMQWEAVLSGLSASGEHSSHQMFQGLRAIAHGNFTRLQGITTAKAEQVLRVSLHSFE<br>STKDSYSALVRLQAIHEIEELANHIRNSVPPEPLVFSATTTGSGPFLPSLGGTLAAPRQETLTVLPLEQWHQR<br>RDQIKNDFDKAESLLALEEVLVQVAKPSDNARVVTKLYDLASLSRKAGRIAIAYRALQKLEHLDERGSLGIYER<br>MQCQIQKAKLLWKQEQEARSIAWTGKSVSSELTGYLRDTSISATEVTSLQLLLVKLTFTGKWIAFQRSESSQVI<br>LEDFFQKATEIMSNMDPEAVSERSRDAAKAHFALAEFMAGMYQQVSTRVTSQEWLTGKMMVVQARHDEL<br>QELQSMEQNMQENRAHIFALNKEVIYDMNERSKVEASVDQFLIGAICSYGKGLTSLQAEIDMVFRVLSL<br>WFNNQHKPDINRVVIEVIDMVPSYKVVPLSYQIISRISASGTFQALRKLVMKLEQHPHHTLIQIALKNS<br>GDVEGKALQFRTNVGDAAKAEKAVYLTLMKTEQRELLQSLDSIANAYVQLALFDTSEYHGKKKKIPLSTVK<br>IFETNSGRSGGTTFDQCLRARARRGDSVVLPAVLTSQIAPQPDMMNYSNVVRMYSFEPQFSITDSGIHRPKIYC<br>YGSDEPEYKQLVKGQDDTRQDLVIEQVFETMNQFLMEEKATRKRKRLRTRVPLSPIAGVLEWVENTMP<br>WGSYLVSRTSKRLSAHERYHPHEWKHTECRQYLNAPDKLPAFLEIEANFTPVFHHFFLEKFPDAAVWYQRR<br>LSYVQSAAVTSIVGYILGIDRHSQNILIHEKTGELVHIDFGVVFQGMALYTPETVPFRLTRDMVDGGMGISG<br>VDGVFSRCCVTLQLLRKKSASVVILEVFVHDPYRWLTSPLKALRIQEGQGHGKPTRSRSSSSGSAEYDG<br>TGSMQDTQPADEMHAEPGSTDAAARALIRVKQKLEGYEDPNGSALSIEGQVQQLINAAQDPLNLCKLFPG<br>WAPWL* |
| >scaffold_29_R3<br>08  | MTSSSCRLLPLWSGVSSVYSDAEIPLRRPFLVFLHRGFWYSRCQVPVSSLCFRIRTFLEVPWPPARVTRHR<br>VHRSSGRLRFTLLSRRVCCSYRARRSLRSACRLRAFVRSYRWYSIGRLFSTQVLVFTVLRMDHPHLGDVLLRL<br>LHCRRLCGALDCGLRSLFSILSDRPIAPISHATIRYIPDAGEFIPNSLWVRENCVGVSRCCRRIHRIPYANT<br>WYYHGVSGRPNRYRIRHLRSYPLLPDVLHPLSYIIGVVHLRRLVYRLVKCLRLALSH*                                                                                                                                                                                                                                                                                                                                                                                                                                                                                                                                                                                                                                                                                                                                                                                                                                                                                                                                                                                                                                                                                                                                                                                    |
| >scaffold_21_F2<br>030 | MQRRMSTPFFLMITTIGDAQGEVEWVMIPADNSPLIKSDSFSRNCGATRRTRWATGVALPTSMSQTAPRA<br>AGGRAFPFPIRCLRFQMICLNRSICTGVLPASSIWISSILTSSVVALTSGSMAI*                                                                                                                                                                                                                                                                                                                                                                                                                                                                                                                                                                                                                                                                                                                                                                                                                                                                                                                                                                                                                                                                                                                                                                                                                                                                                                                                                 |
| >scaffold_494_F<br>2   | MRLLYLAGVAIFAADAKVLVSDSVNNRAQAASASVVSTTRLLRTRSVIDEERAGGISASASDKLAKLFKSS<br>KVTDEQLQKWLNNGKTAESVFYRMNLENTLYTRVFESQPFRWLQYADDLSASGKGASISVLSTKYGDDT<br>LYKMIGWAKKESSTKALGIRLQTEQLEHWVKIGKDPDEVFKLYKLDYAGNRILGNPQFSAWTKYVDDLNAK<br>NKGAFVSIPTLRKYISDDDLFKIALAAKRSGETKAMGTKLEDAIVQFWNRAGGPVGNPT*                                                                                                                                                                                                                                                                                                                                                                                                                                                                                                                                                                                                                                                                                                                                                                                                                                                                                                                                                                                                                                                                                                                                                                                       |
| >scaffold_100_R<br>322 | MRICFVLLLTVAALVTAVSGSSVNLNRDSQRIDVVQDKTSSRELRGDLNTEATEERASDFVKKLVAKLKGDPL<br>ESFAKRQTKYIFSDDIFDEMLKKFPDPDALYTTKLHVIKNRSNKYGVTTARHKLHQNFLLTSYIDKFPNWRSKL<br>N*                                                                                                                                                                                                                                                                                                                                                                                                                                                                                                                                                                                                                                                                                                                                                                                                                                                                                                                                                                                                                                                                                                                                                                                                                                                                                                                     |
